# Supplementary material for: Potent MOR Agonists from 2′-Hydroxy-5,9-dimethyl-N-phenethyl Substituted-6,7-benzomorphans and from C8-Hydroxy, Methylene and Methyl Derivatives of N-Phenethylnormetazocine
Source: MDPI journal article supplement (doi:10.3390/molecules28237709), 2023-11-22
Supplement: s1 [file s1]

## Supplemental Materials

### Potent MOR Agonists from 2'-Hydroxy-5,9-dimethyl-*N*-phenethyl substituted-6,7-benzomorphans and from C8-Hydroxy, Methylene and Methyl Derivatives of *N*-Phenethylnormetazocine

Madhurima Das <sup>1</sup>, George W. Ward <sup>1</sup>, Agnieszka Sulima <sup>1</sup>, Dan Luo <sup>2</sup>, Thomas Edward Prisinzano <sup>2</sup>, Gregory H. Imler <sup>3</sup>, Andrew T. Kerr <sup>3</sup>, Arthur E. Jacobson <sup>1,\*</sup> and Kenner C. Rice <sup>1,\*</sup>

- <sup>1</sup> Drug Design and Synthesis Section, Molecular Targets and Medications Discovery Branch, Intramural Research Program, National Institute on Drug Abuse and the National Institute on Alcohol Abuse and Alcoholism, National Institutes of Health, Department of Health and Human Services, 9800 Medical Center Drive, Bethesda, MD 20892, USA; madhurima.das.91@gmail.com (M.D.); george.ward@fda.hhs.gov (G.W.W.); agnieszka.sulima@nih.gov (A.S.)
- <sup>2</sup> Department of Pharmaceutical Sciences, College of Pharmacy, University of Kentucky, 789 S. Limestone Street, Lexington, KY 40536, USA; dan.luo@uky.edu (D.L.); prisinzano@uky.edu (T.E.P.)
- <sup>3</sup> Center for Biomolecular Science and Engineering, Naval Research Laboratory, Washington, DC 20375, USA; greg.imler@gmail.com (G.H.I.); andrew.kerr@nrl.navy.mil (A.T.K.)
- \* Correspondence: arthurj@nida.nih.gov (A.E.J.); kennerr@nida.nih.gov (K.C.R.); Tel.: +1-301-451-5028 (A.E.J.); +1-301-451-4799 (K.C.R.)

## Table of Contents

|                                                                                                  |         |
|--------------------------------------------------------------------------------------------------|---------|
| Figures S1-S40 $^1\text{H}$ and $^{13}\text{C}$ NMR                                              | S3-S42  |
| Optical resolution of <i>rac</i> - <b>34</b>                                                     | S34     |
| X-ray crystallographic analysis data for 1 <i>R</i> ,5 <i>S</i> ,9 <i>S</i> -(+)- <b>36</b> .HBr | S43-S50 |

# <sup>1</sup>H NMR and <sup>13</sup>C NMR of (-)-3

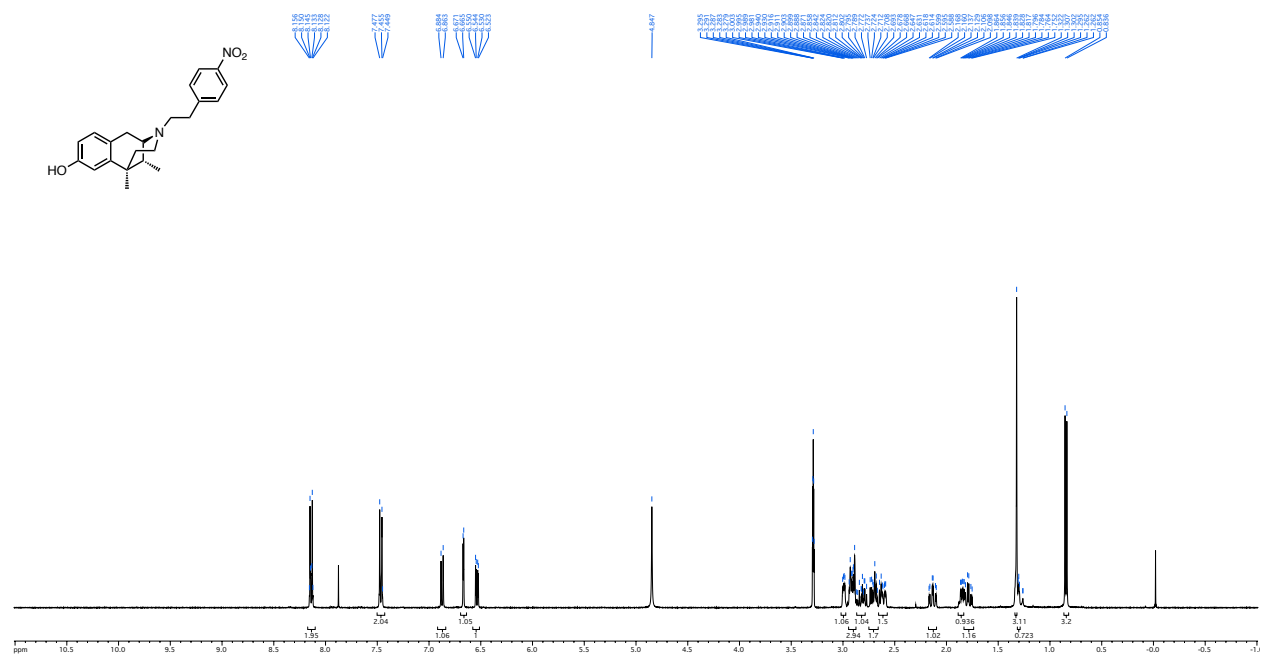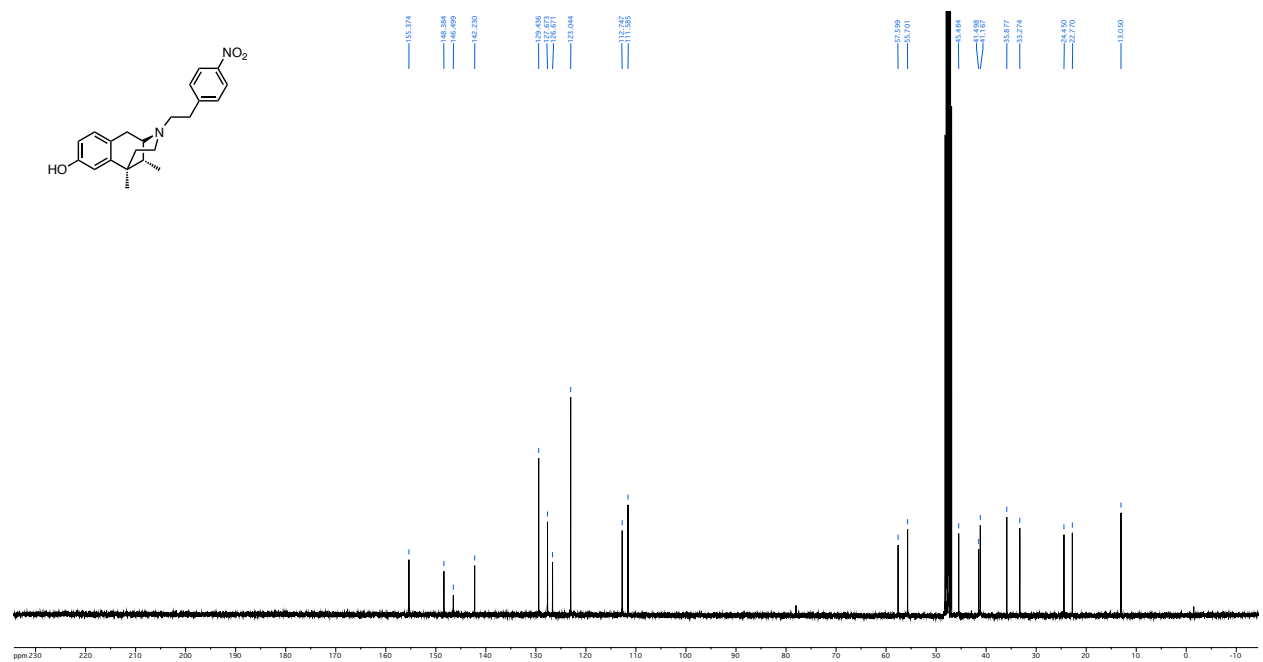

# <sup>1</sup>H NMR and <sup>13</sup>C NMR of (-)-4

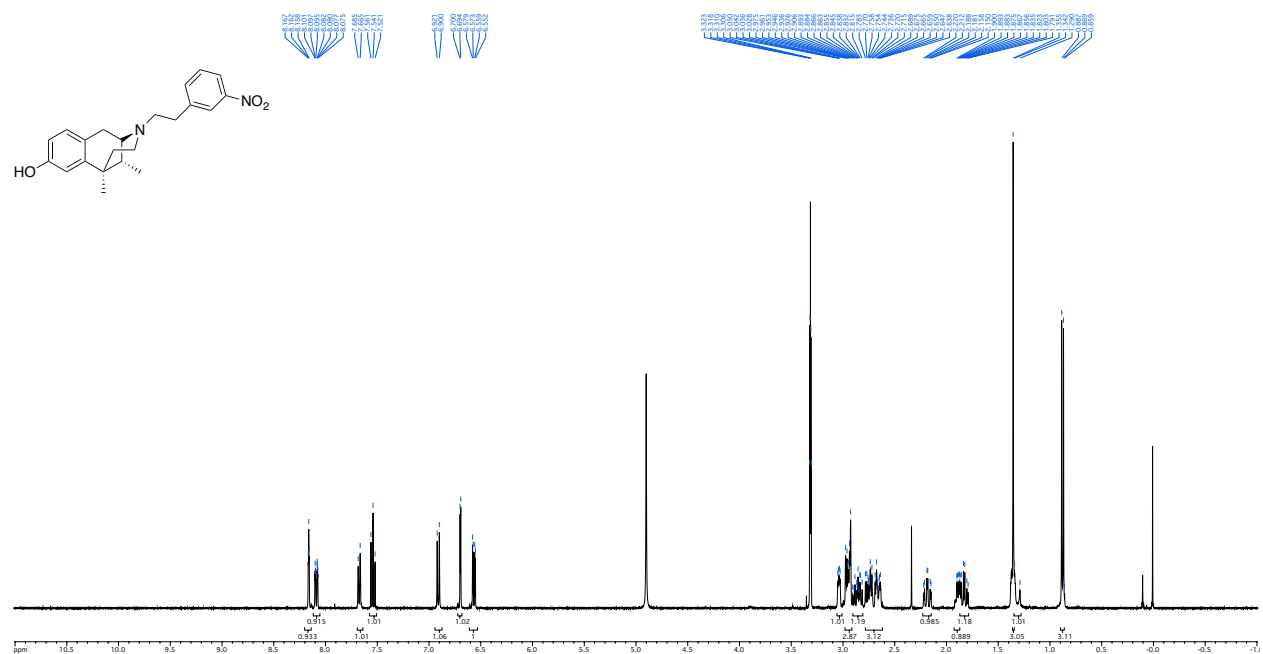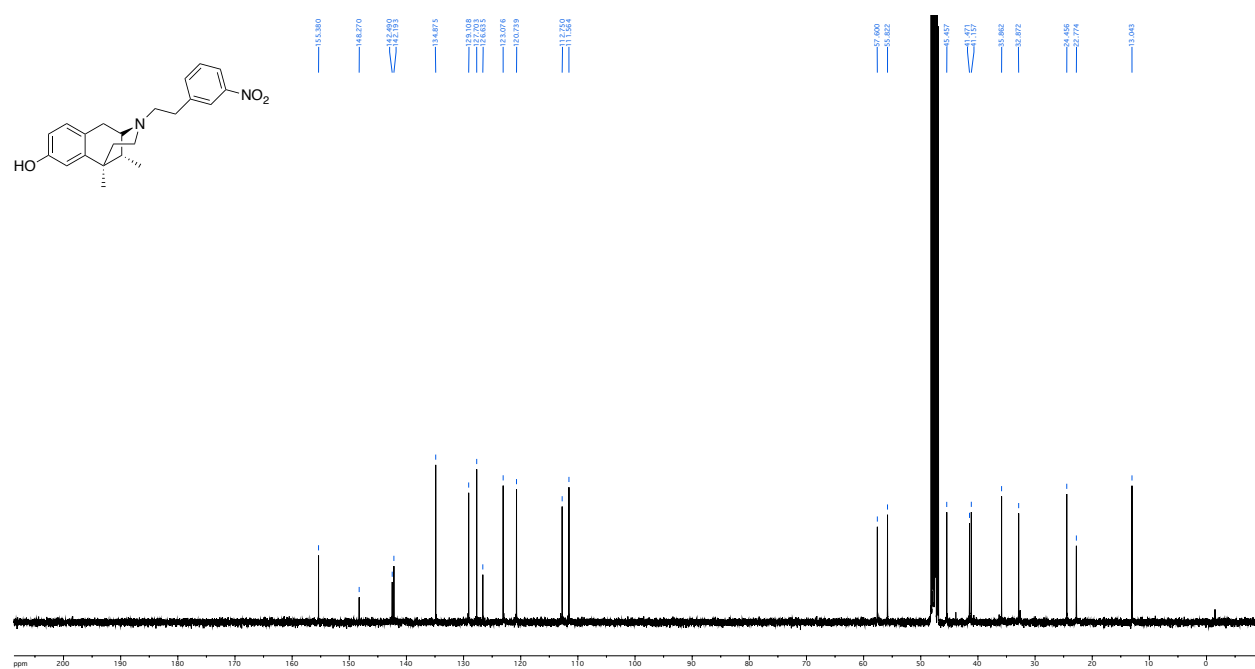



# <sup>1</sup>H NMR and <sup>13</sup>C NMR of (-)-5

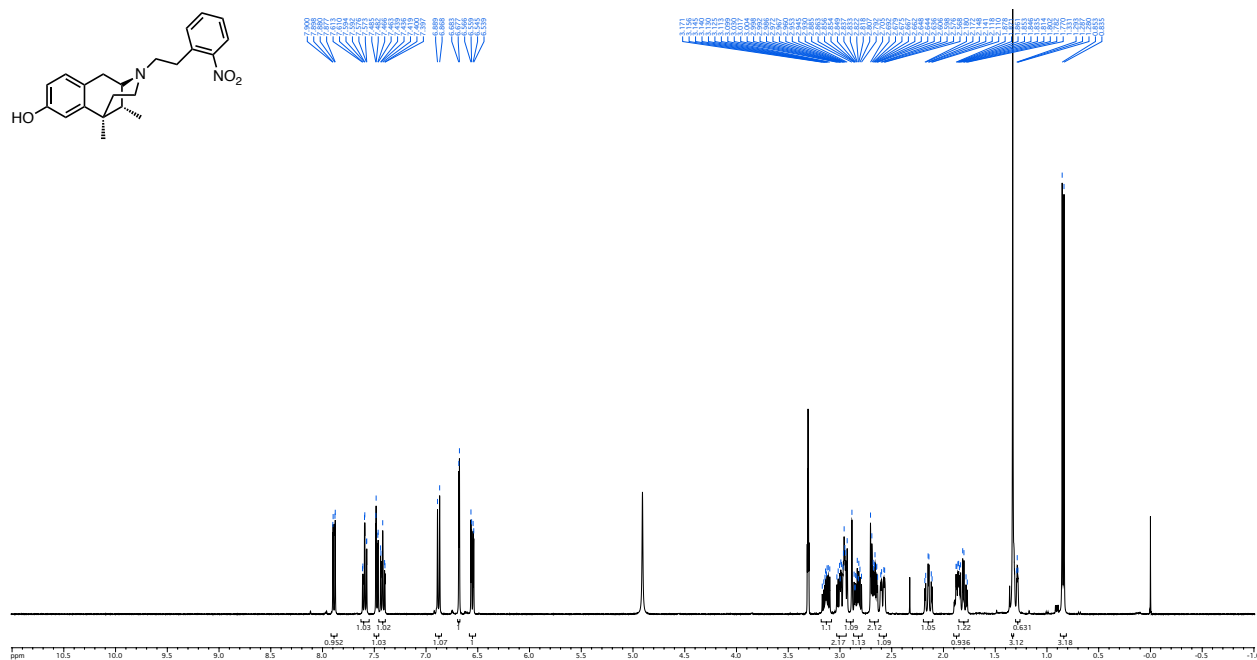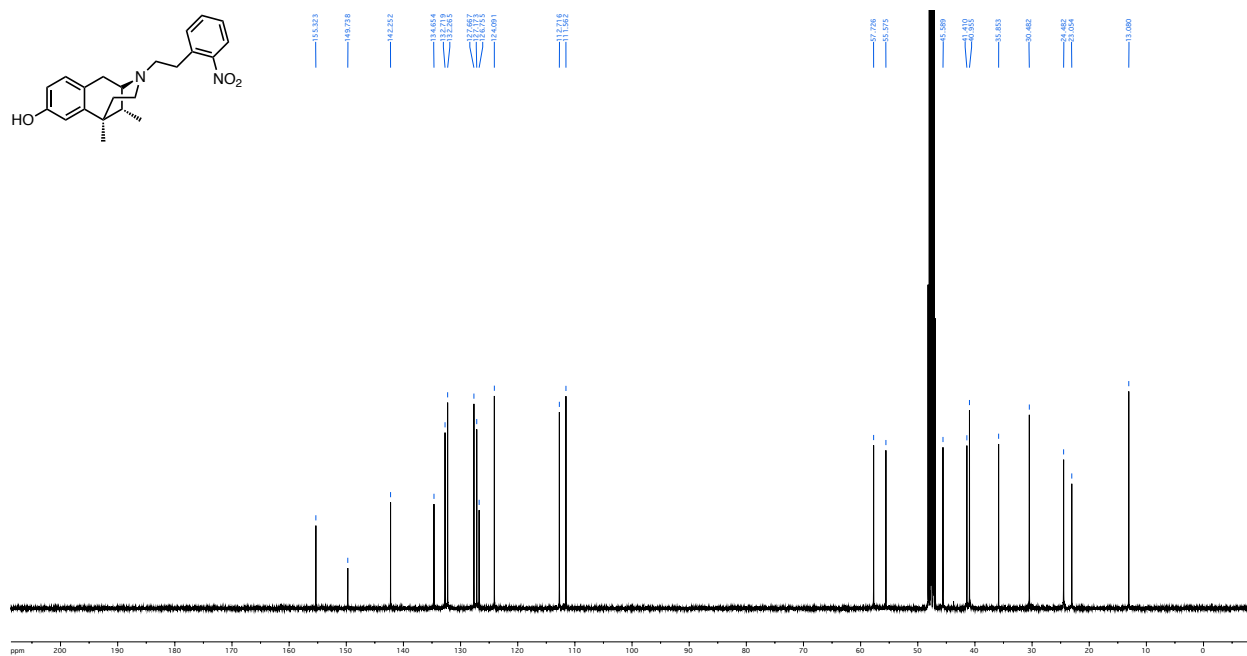

# <sup>1</sup>H NMR and <sup>13</sup>C NMR of (–)-6

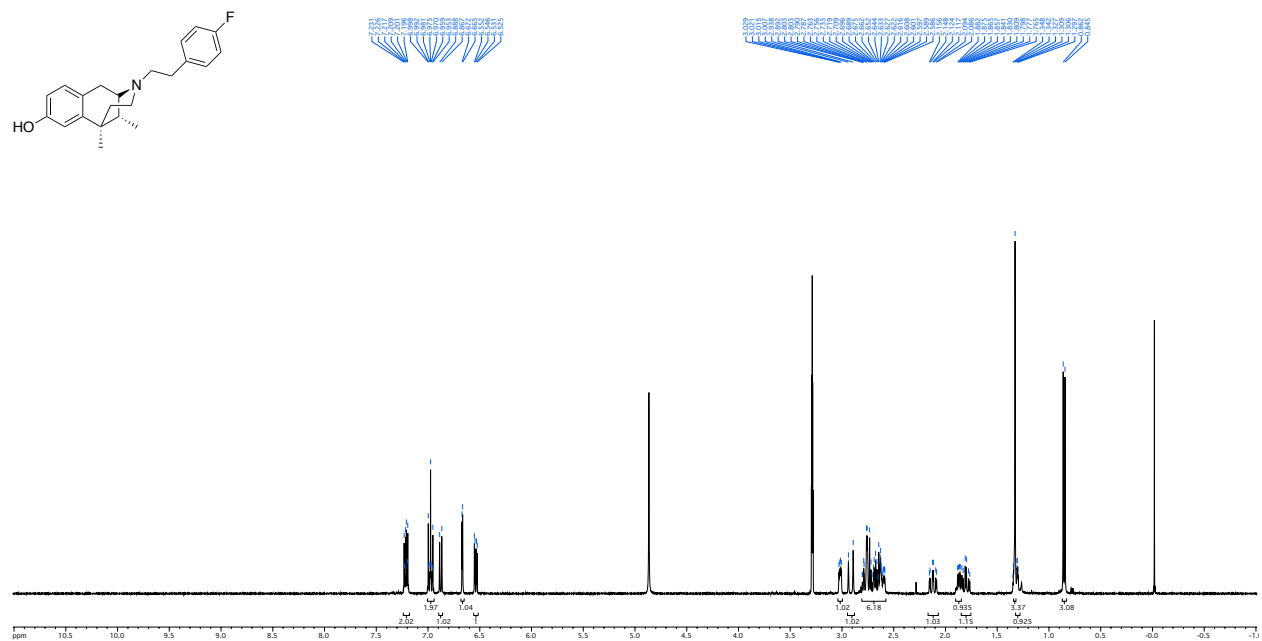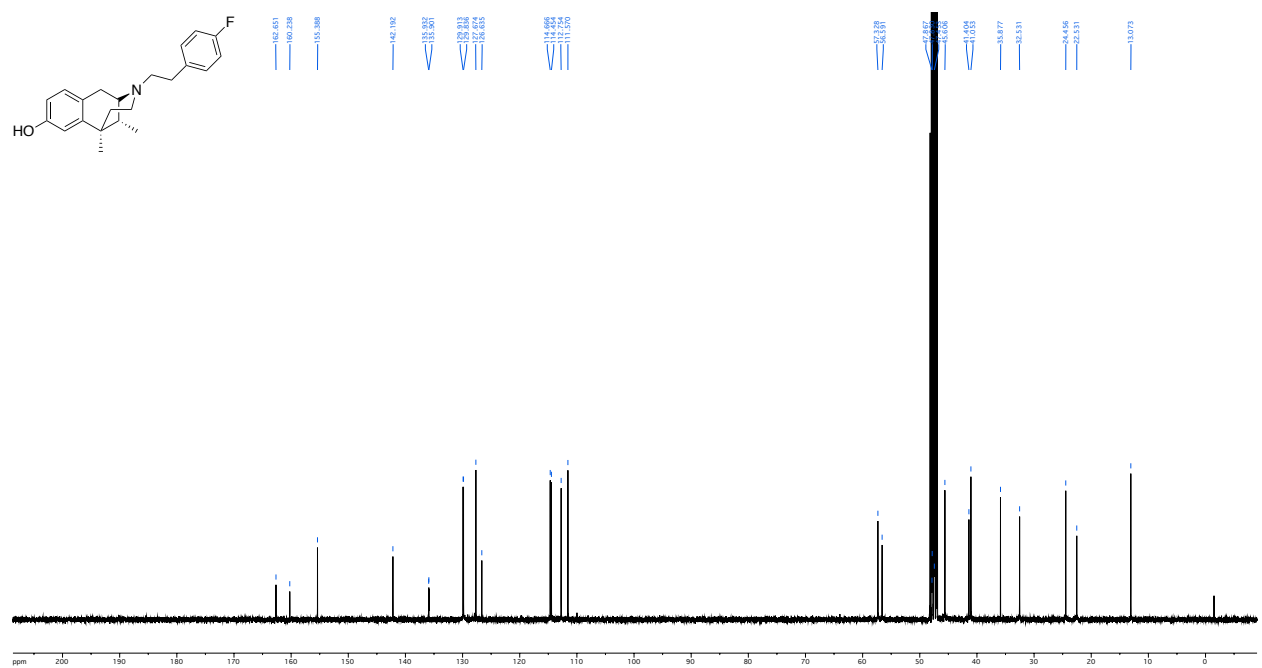

Chemical structure of (S)-1-(3-fluorophenyl)-1,2,3,4,6,7-hexahydro-1H-benzocyclohepta[b]pyridine-5-ol is shown above the spectrum.

<sup>1</sup>H NMR spectrum (400 MHz, CDCl<sub>3</sub>) showing peaks from 0 to 11 ppm. The spectrum includes a broad singlet at ~10.1 ppm (OH), a multiplet at ~7.2 ppm (aromatic H), a doublet at ~6.7 ppm (aromatic H), a singlet at ~5.9 ppm (CH), a singlet at ~4.9 ppm (CH), a multiplet at ~3.0 ppm (CH<sub>2</sub>), a multiplet at ~2.5 ppm (CH<sub>2</sub>), a multiplet at ~2.0 ppm (CH<sub>2</sub>), a multiplet at ~1.7 ppm (CH<sub>2</sub>), a singlet at ~1.4 ppm (CH<sub>3</sub>), and a doublet at ~1.1 ppm (CH<sub>3</sub>). Integration values are shown below the peaks.

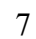

Oc1ccc2c(c1)[C@H]3CC[C@@H]2[C@H](C3)NCCc4ccccc4F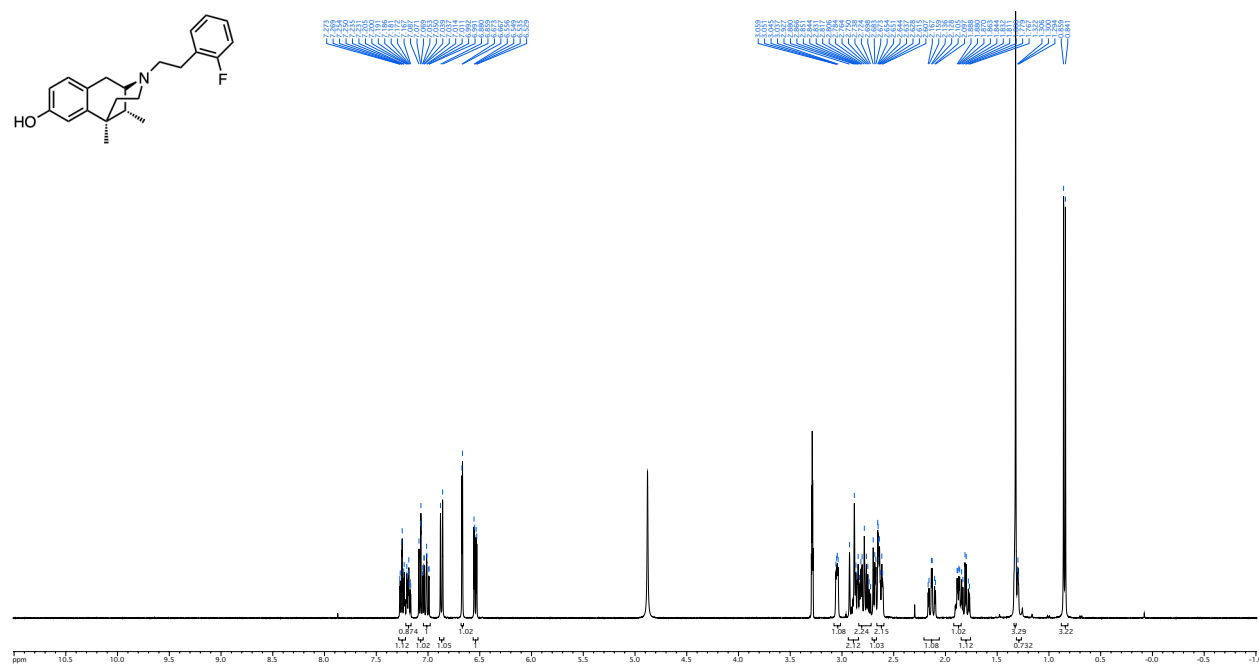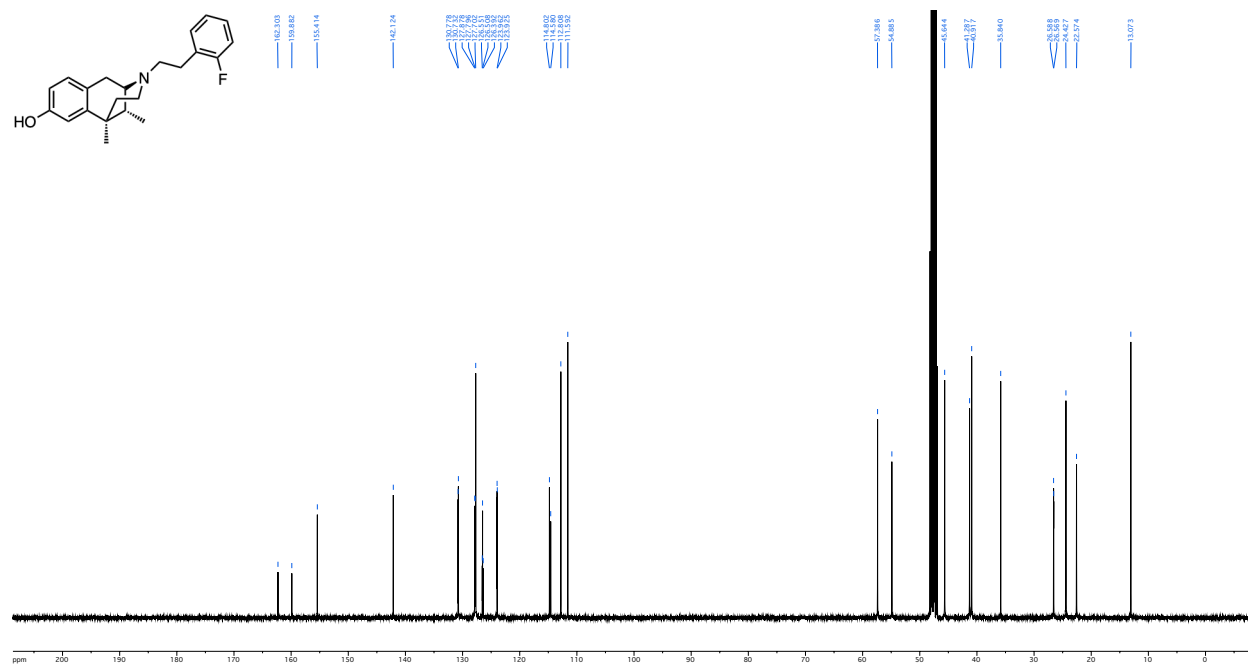

# <sup>1</sup>H NMR and <sup>13</sup>C NMR of (-)-9

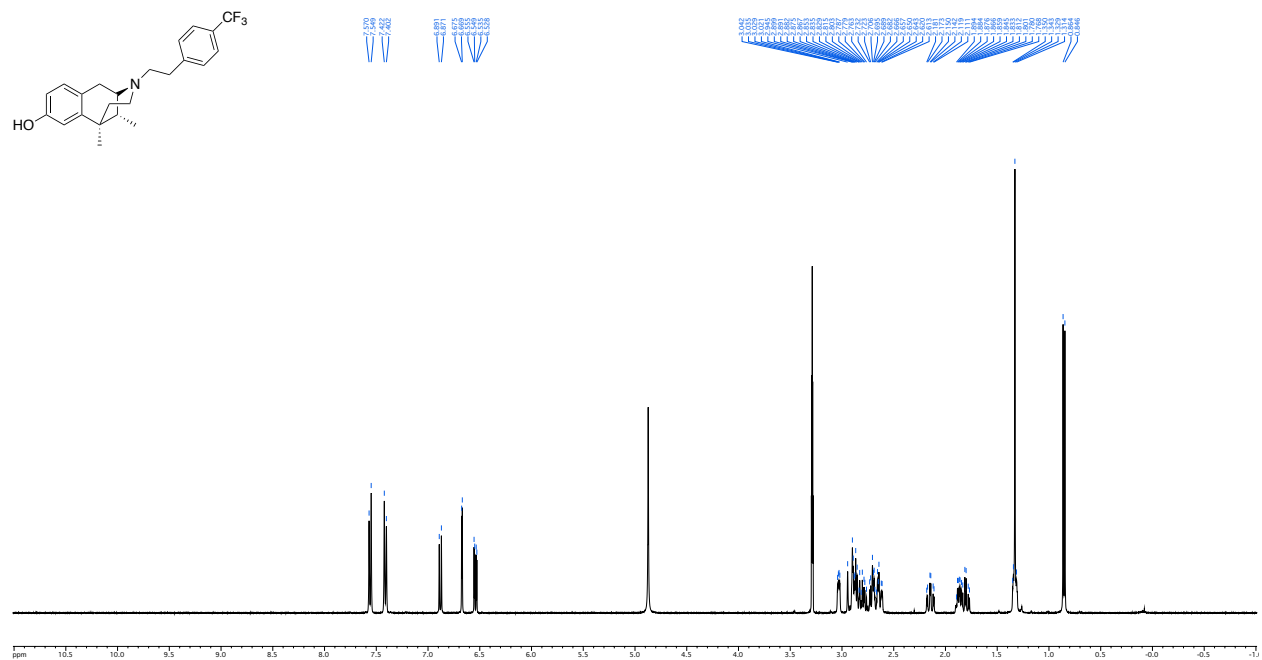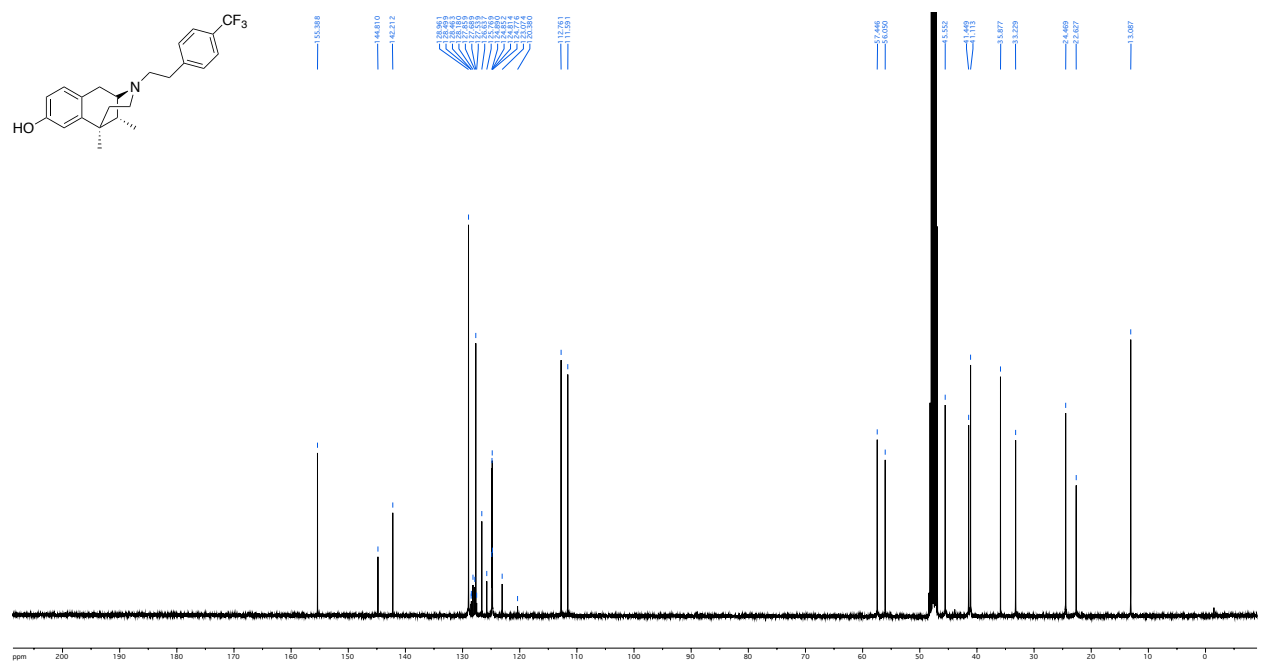

# <sup>1</sup>H NMR and <sup>13</sup>C NMR of (-)-10

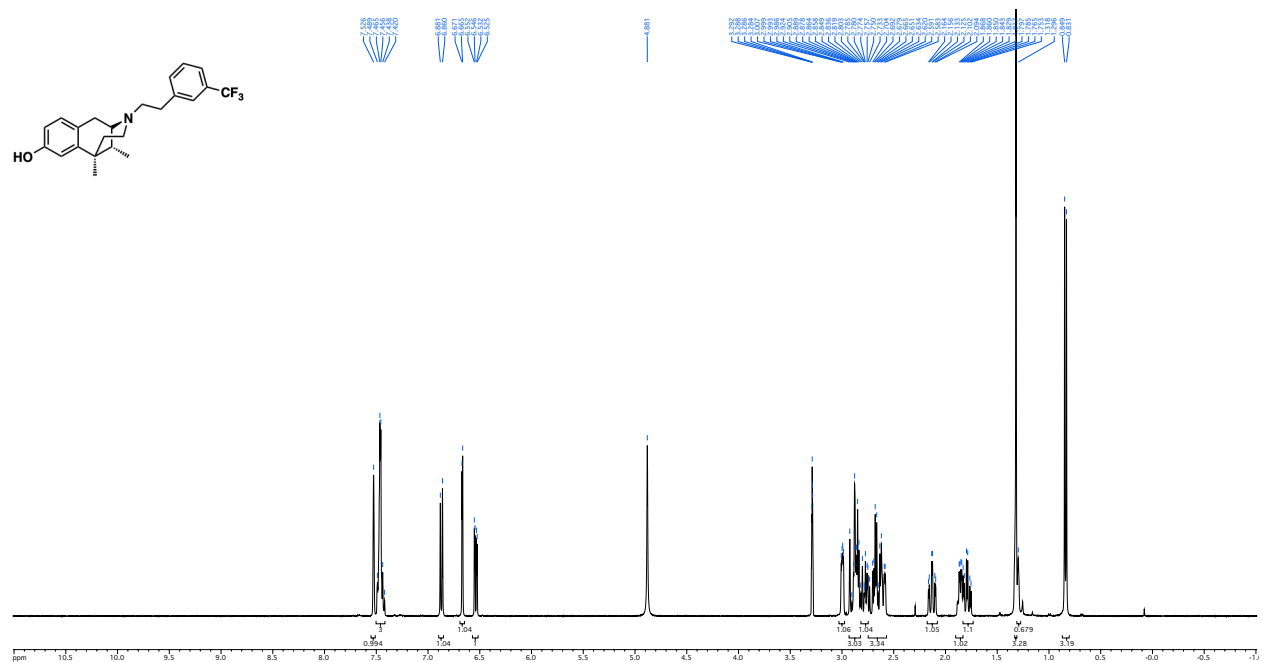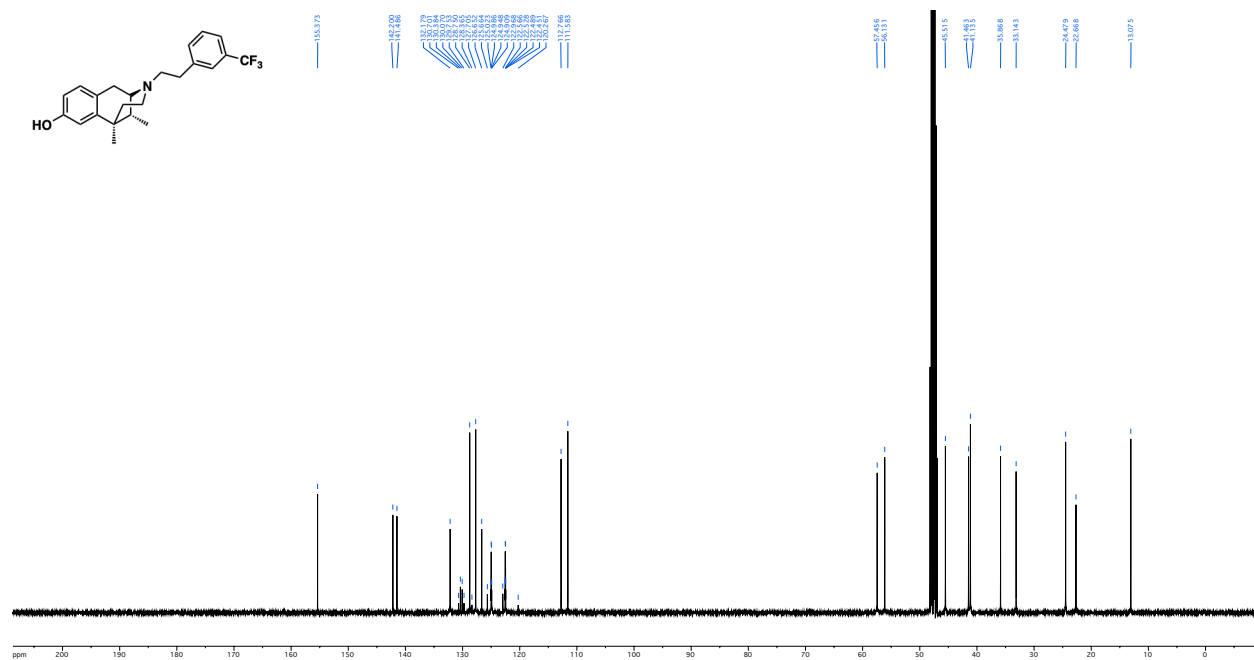

# <sup>1</sup>H NMR and <sup>13</sup>C NMR of (-)-11

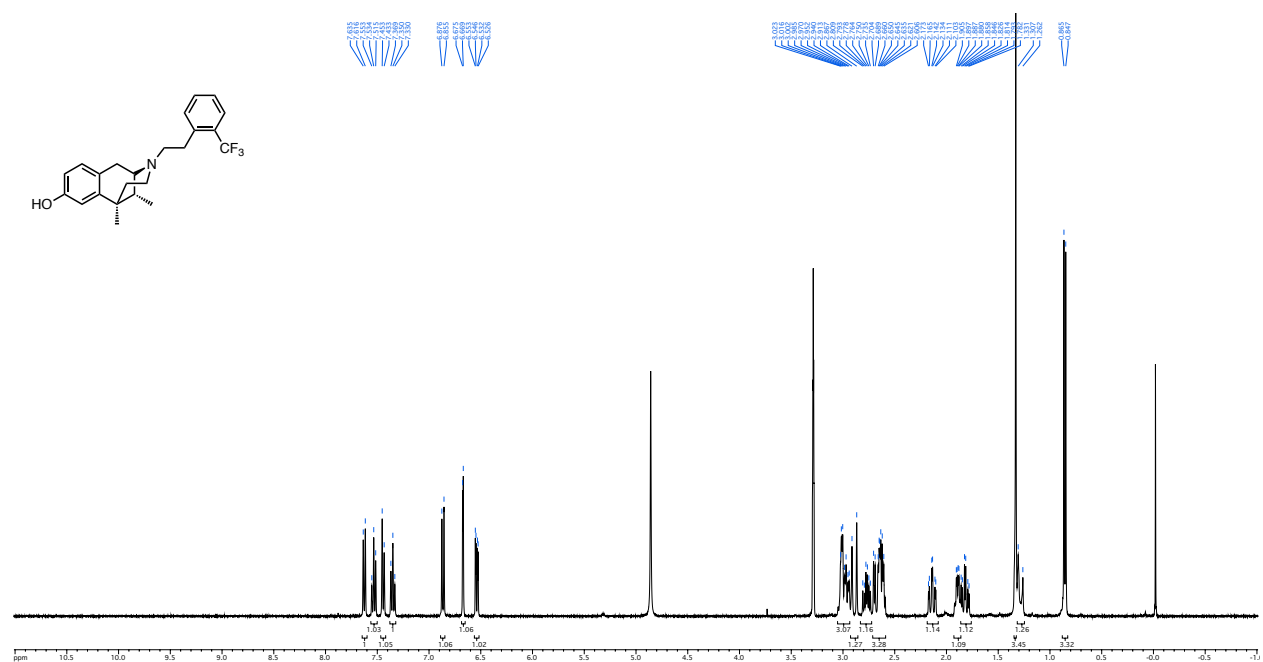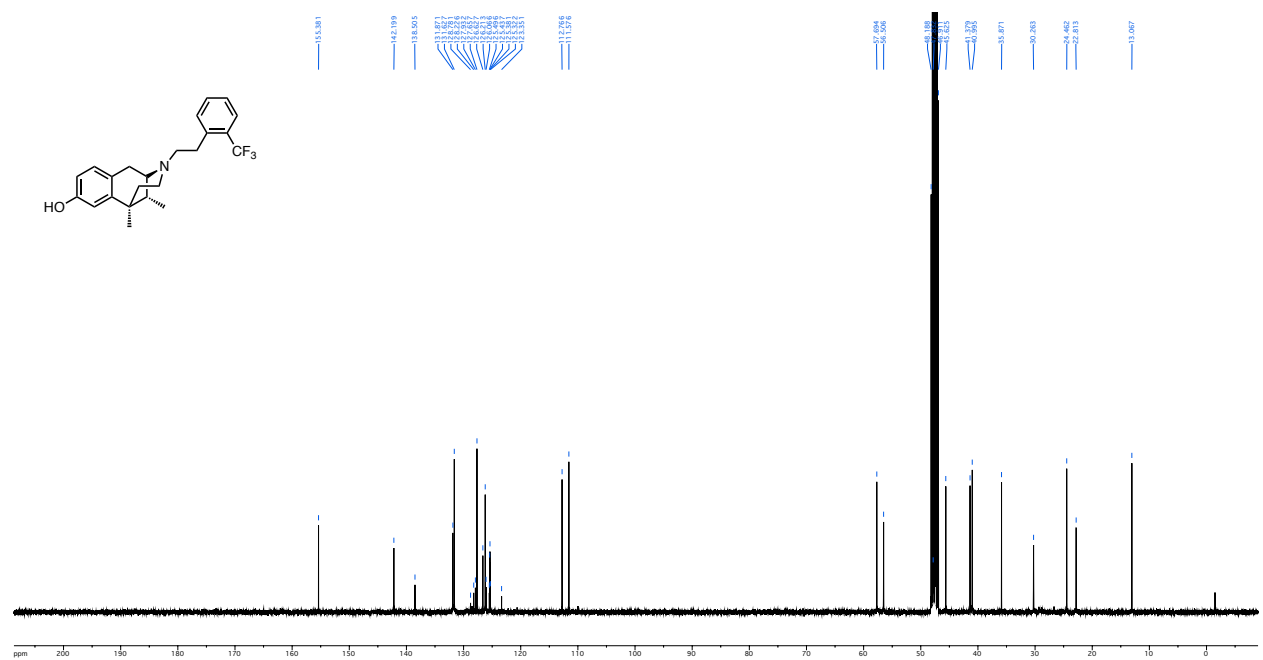

# <sup>1</sup>H NMR and <sup>13</sup>C NMR of (-)-12

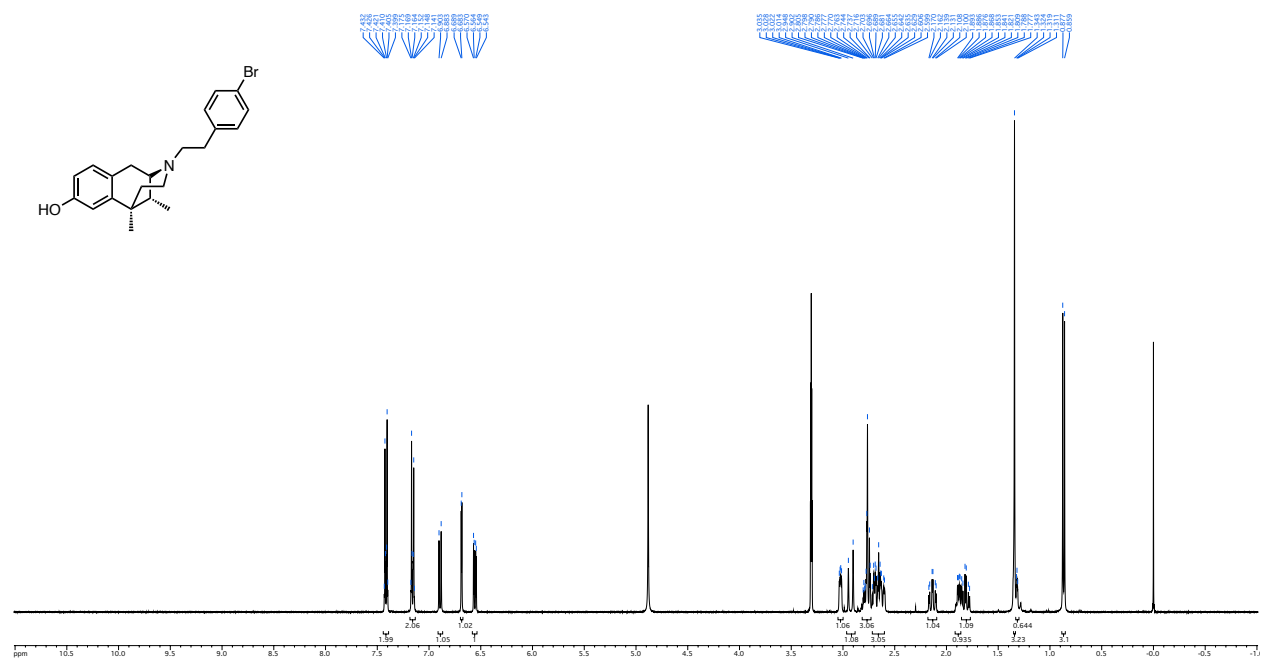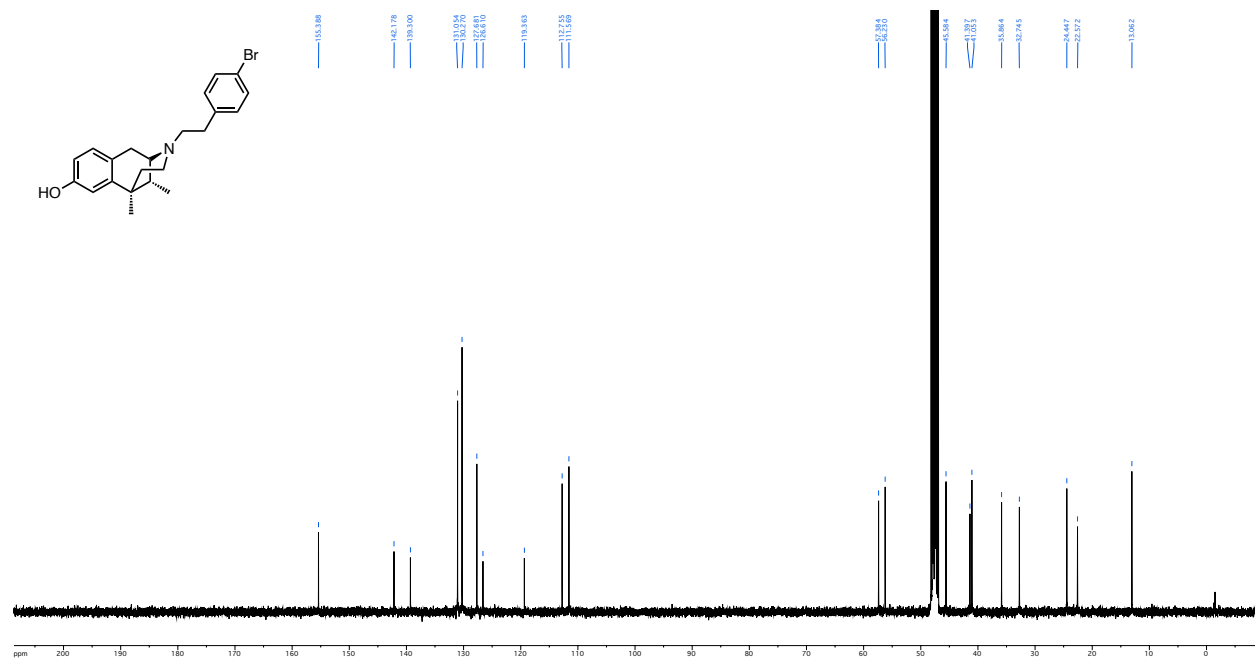



# <sup>1</sup>H NMR and <sup>13</sup>C NMR of (–)13

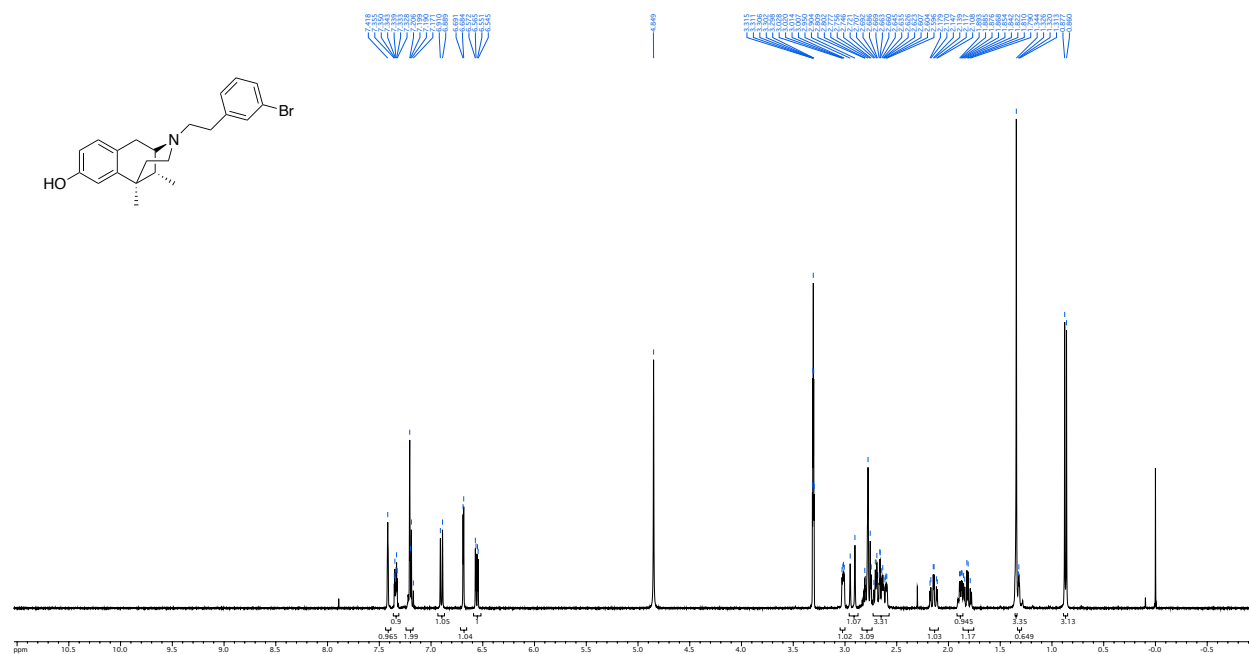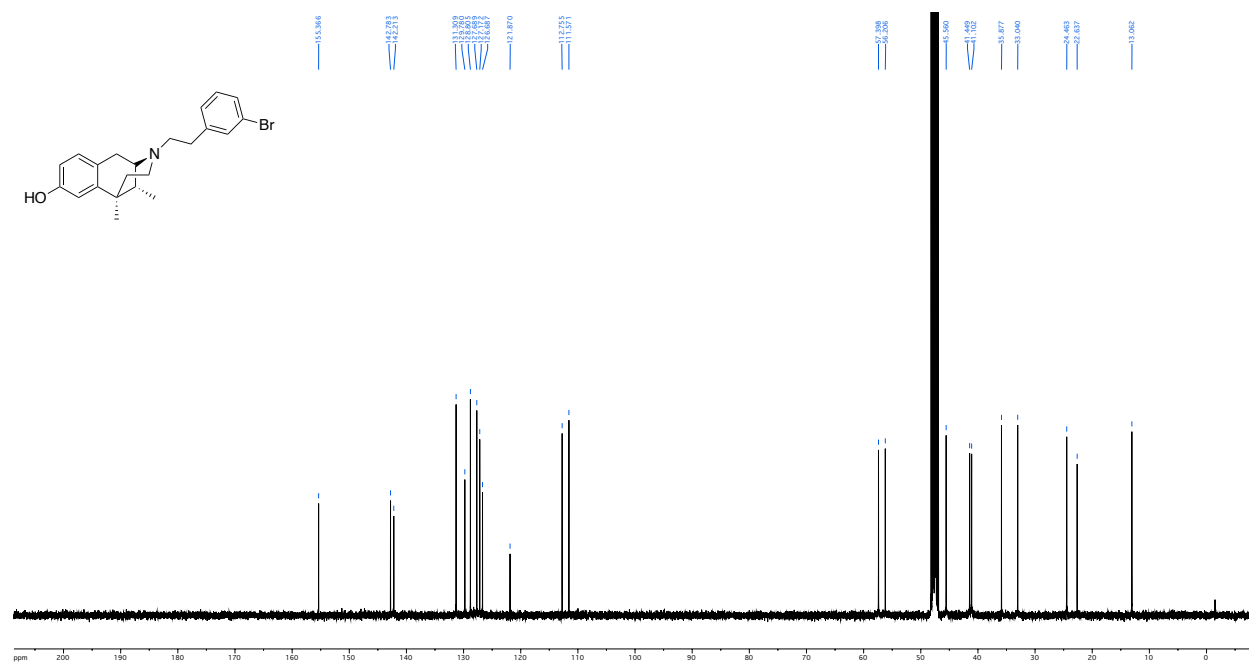

# <sup>1</sup>H NMR and <sup>13</sup>C NMR of (-)-14

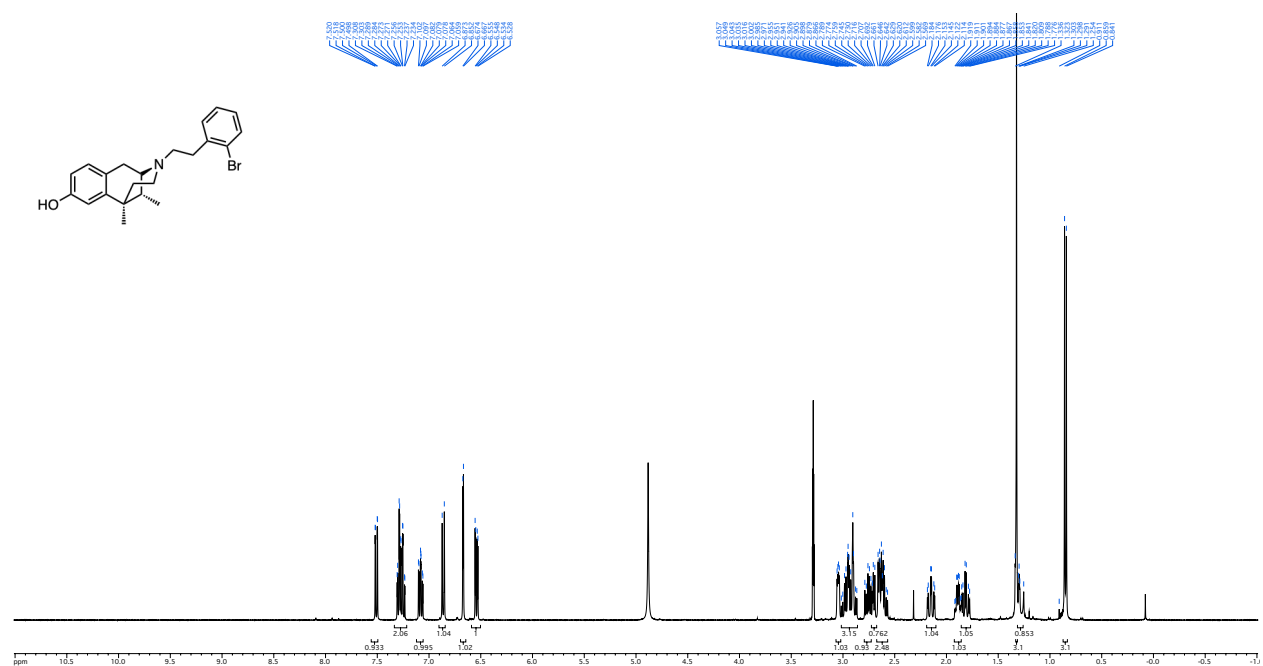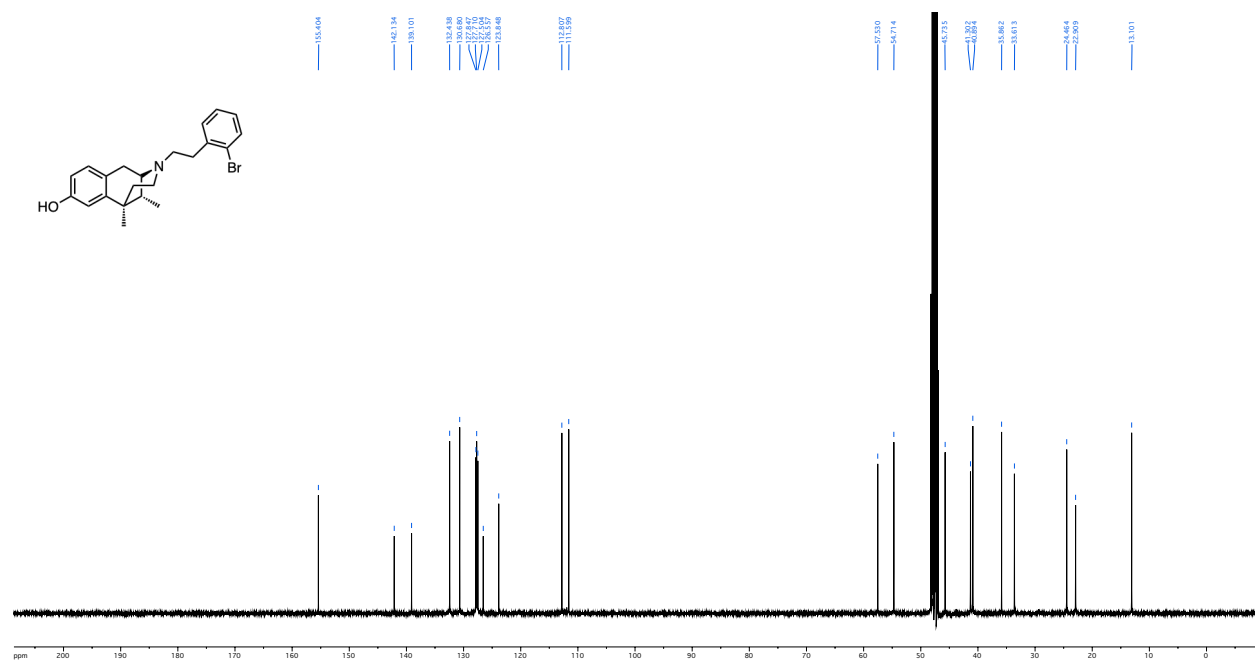

# **<sup>1</sup>H NMR and <sup>13</sup>C NMR of (–)-15**

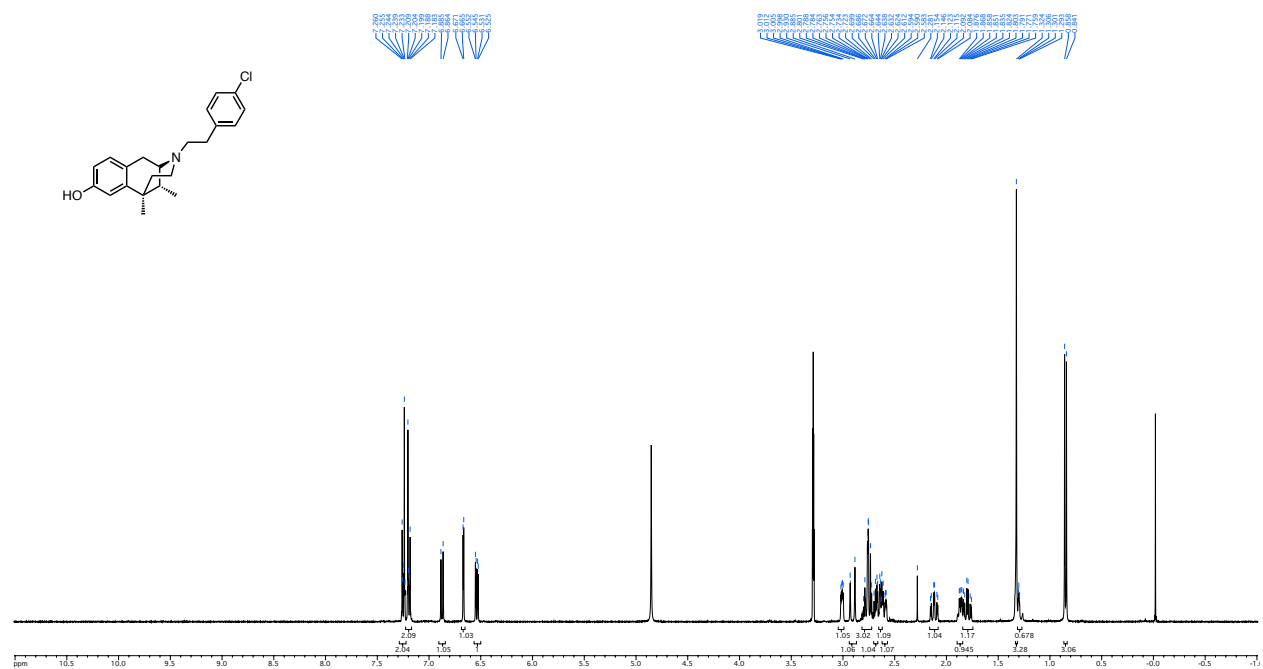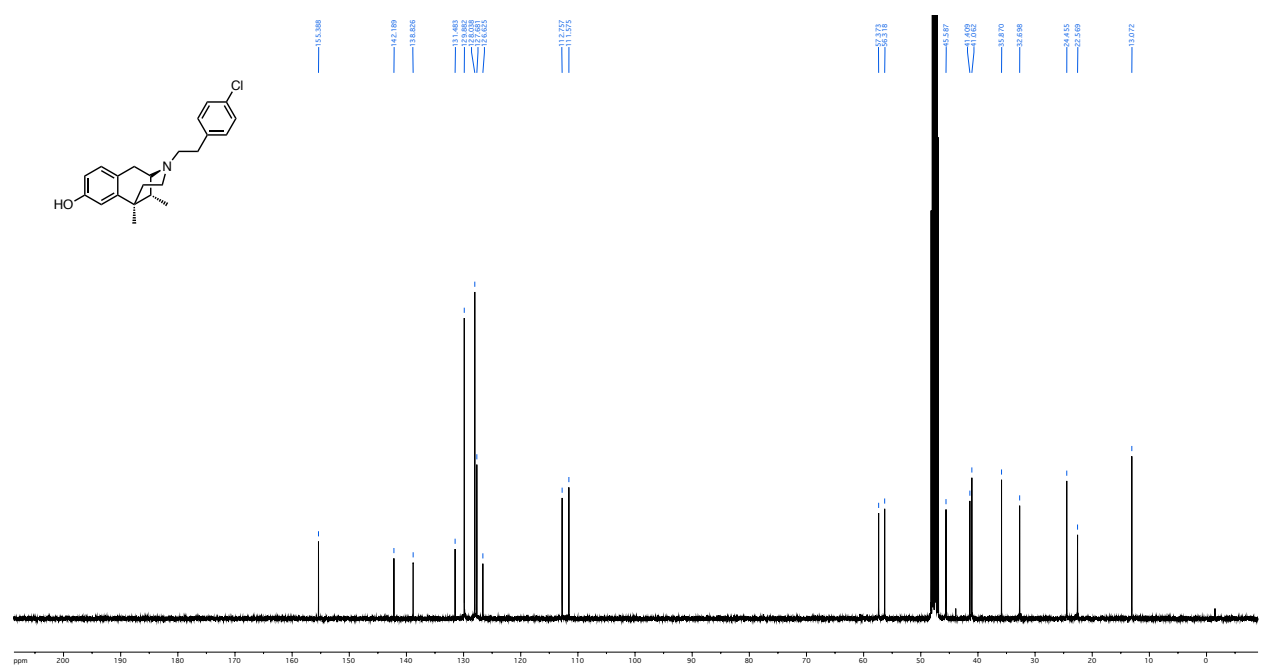

Chemical structure: Clc1ccc(cc1)CCN2[C@H](C)[C@@H](C)[C@H](O)C3=CC=CC=C23

<sup>1</sup>H NMR spectrum (400 MHz, CDCl<sub>3</sub>) showing peaks from 0 to 10 ppm. Integration values are provided below the baseline.

| Chemical Shift (ppm)                   | Integration      |
|----------------------------------------|------------------|
| ~7.2 (broad singlet, OH)               | 2.91             |
| ~7.0 (multiplet, aromatic)             | 1.06             |
| ~6.6 (multiplet, aromatic)             | 1.03             |
| ~4.8 (singlet, CH-OH)                  | 1.00             |
| ~3.0 (multiplet, CH <sub>2</sub> )     | 1.35, 3.27, 2.16 |
| ~2.5 (multiplet, CH <sub>2</sub> )     | 1.57, 1.50       |
| ~2.0 (multiplet, CH <sub>2</sub> )     | 1.15, 1.50       |
| ~1.5 (sharp singlet, CH <sub>3</sub> ) | 3.46, 0.67       |
| ~1.2 (sharp singlet, CH <sub>3</sub> ) | 3.17             |

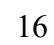

Chemical structure of 1-(2-chlorophenyl)-N-(2,2-dimethyl-4-hydroxy-1,2,3,4-tetrahydronaphthalen-1-yl)ethan-1-amine:

Clc1ccccc1CCN2[C@H]3C[C@@H](C)[C@H](C)[C@H]3[C@@H](O)C=C4C=CC=CC=C4C2

<sup>1</sup>H NMR spectrum (CDCl<sub>3</sub>) showing peaks from 0 to 8 ppm. Integration values are provided below the baseline:

- 7.37 (1.37), 7.34 (2.04), 7.04 (0.97), 6.97 (1.00), 6.54 (1.00)
- 3.04 (1.56), 2.97 (2.57), 2.94 (3.96), 2.54 (1.55), 2.34 (1.55)
- 1.54 (2.47), 1.34 (3.14)

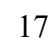

# <sup>1</sup>H NMR and <sup>13</sup>C NMR of (-)-18

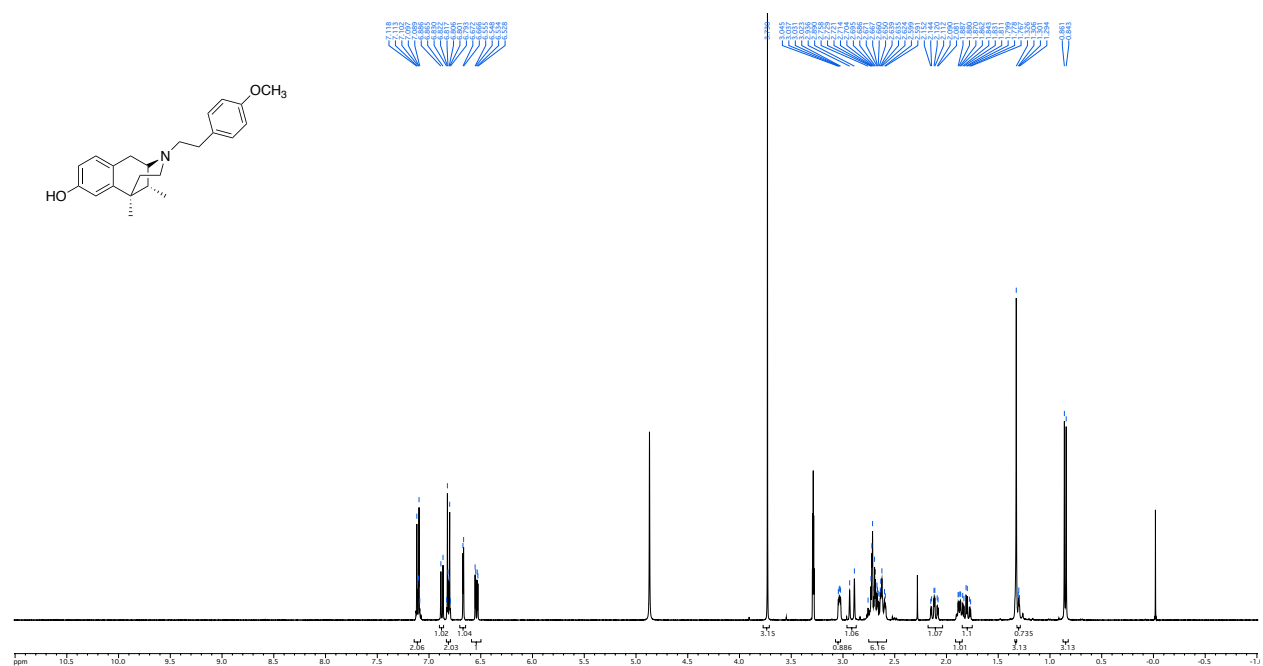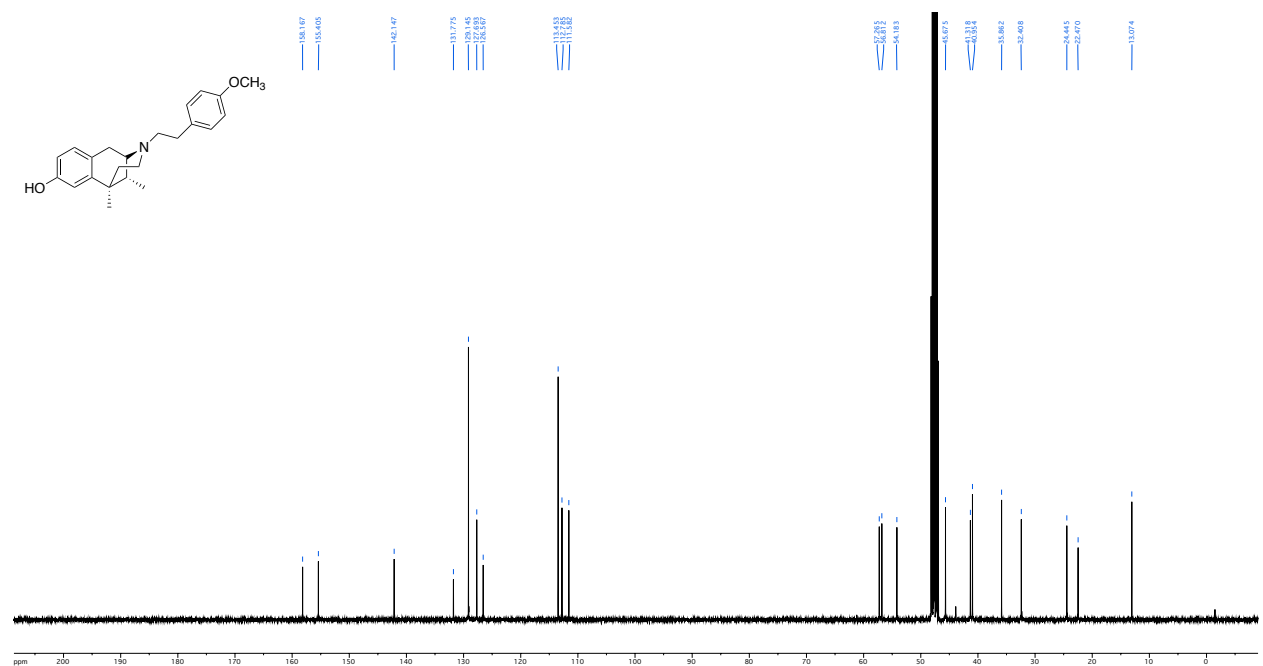

# <sup>1</sup>H NMR and <sup>13</sup>C NMR of (-)-19

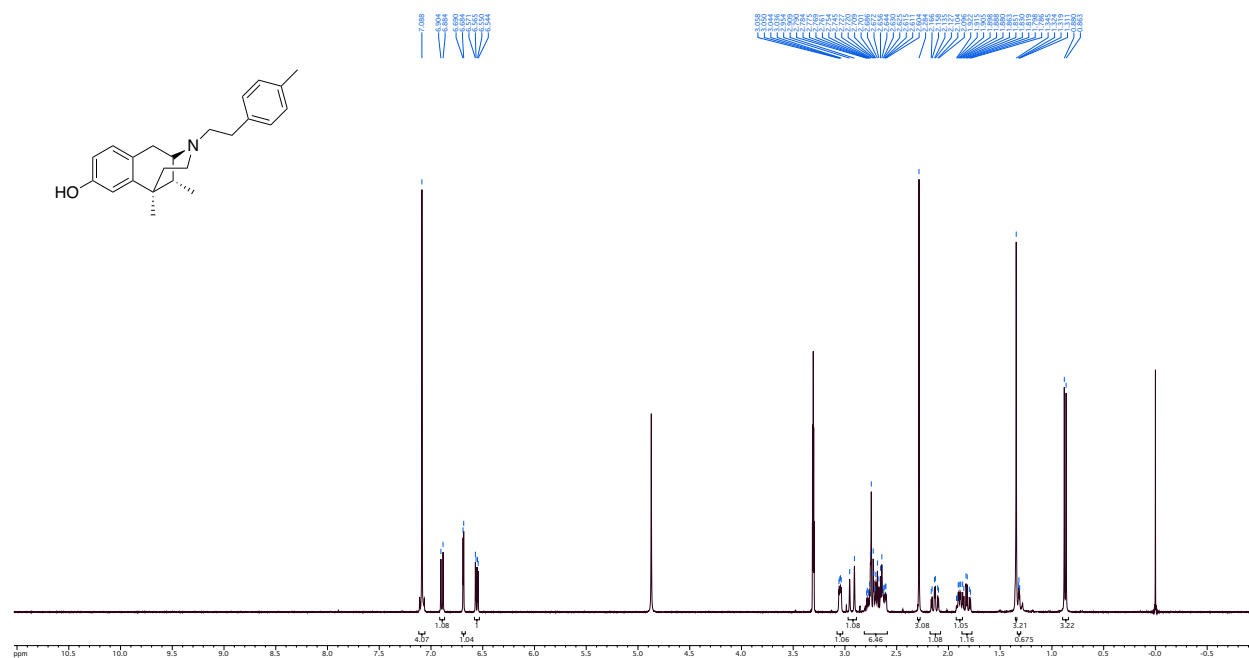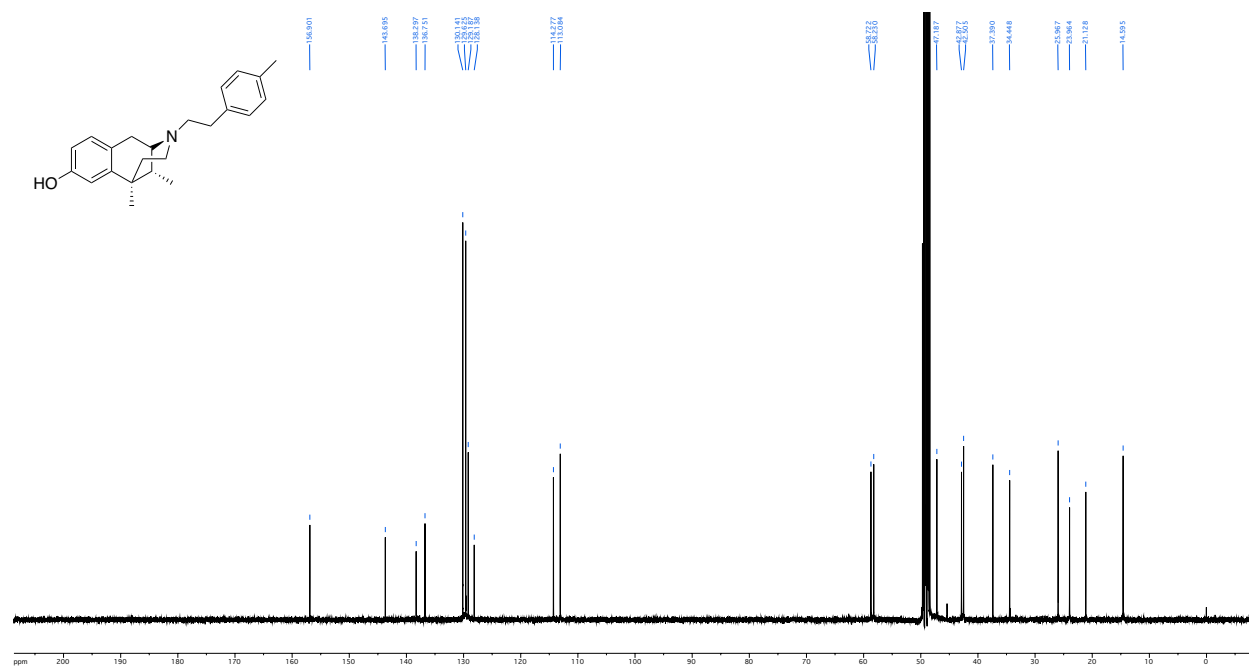

# <sup>1</sup>H NMR and <sup>13</sup>C NMR of (-)-20

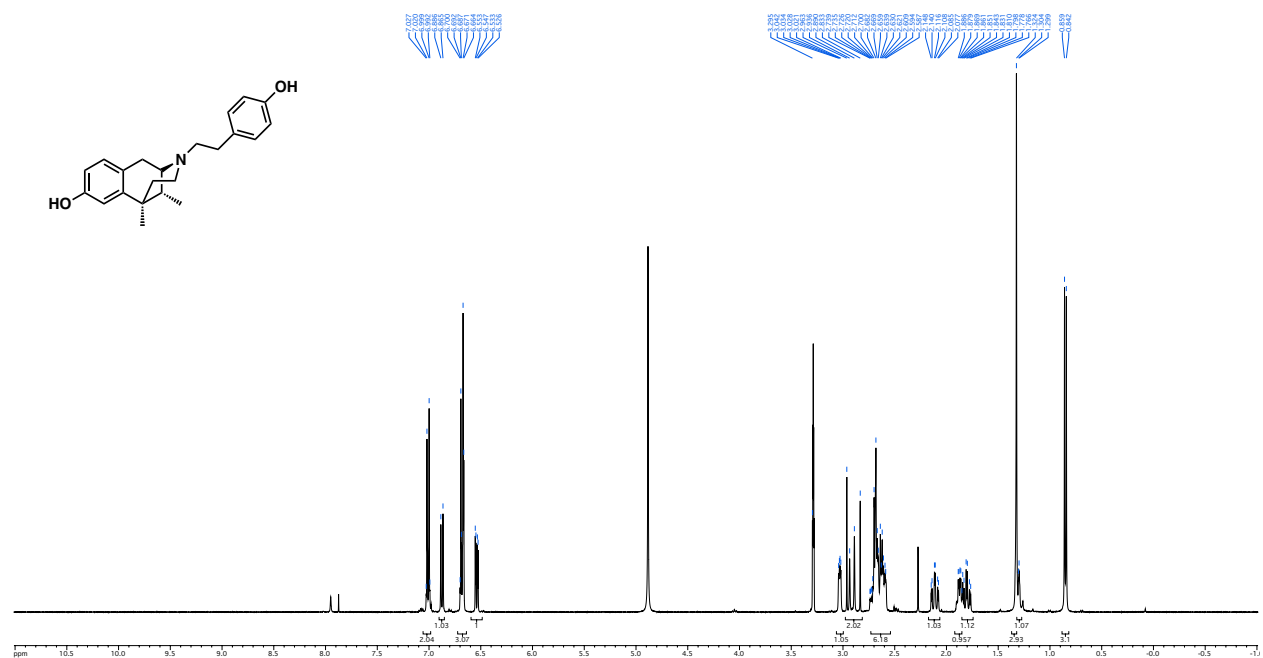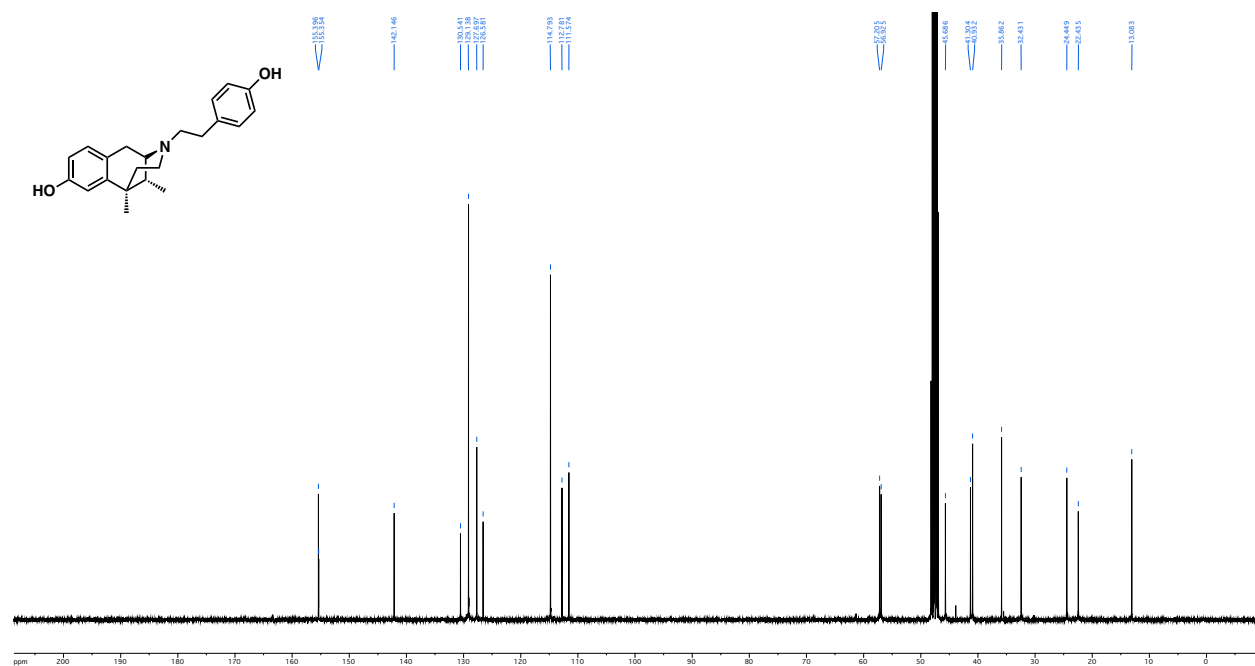



# <sup>1</sup>H NMR and <sup>13</sup>C NMR of (-)-21

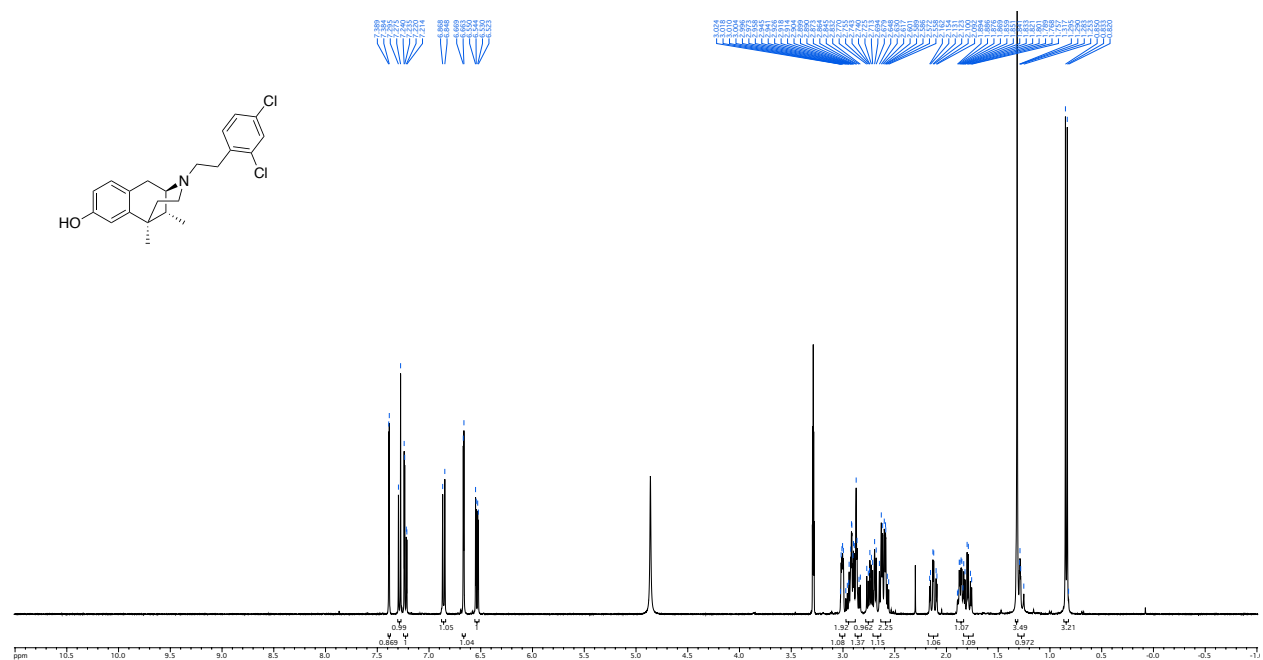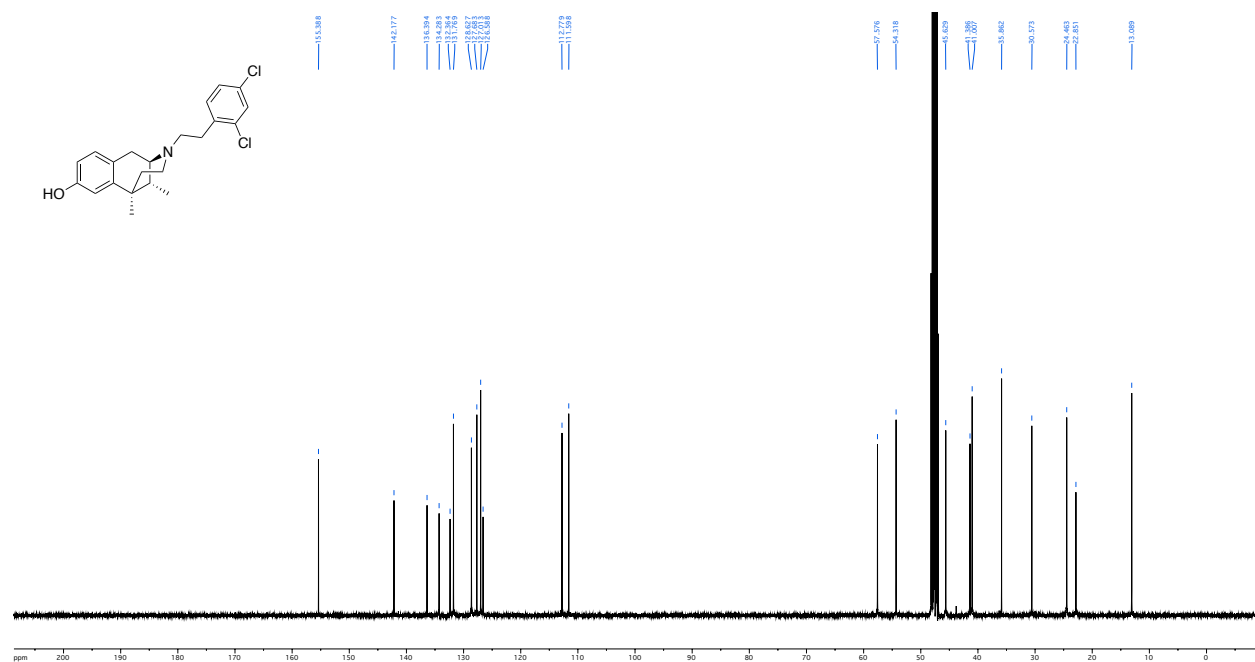

# <sup>1</sup>H NMR and <sup>13</sup>C NMR of (-)-22

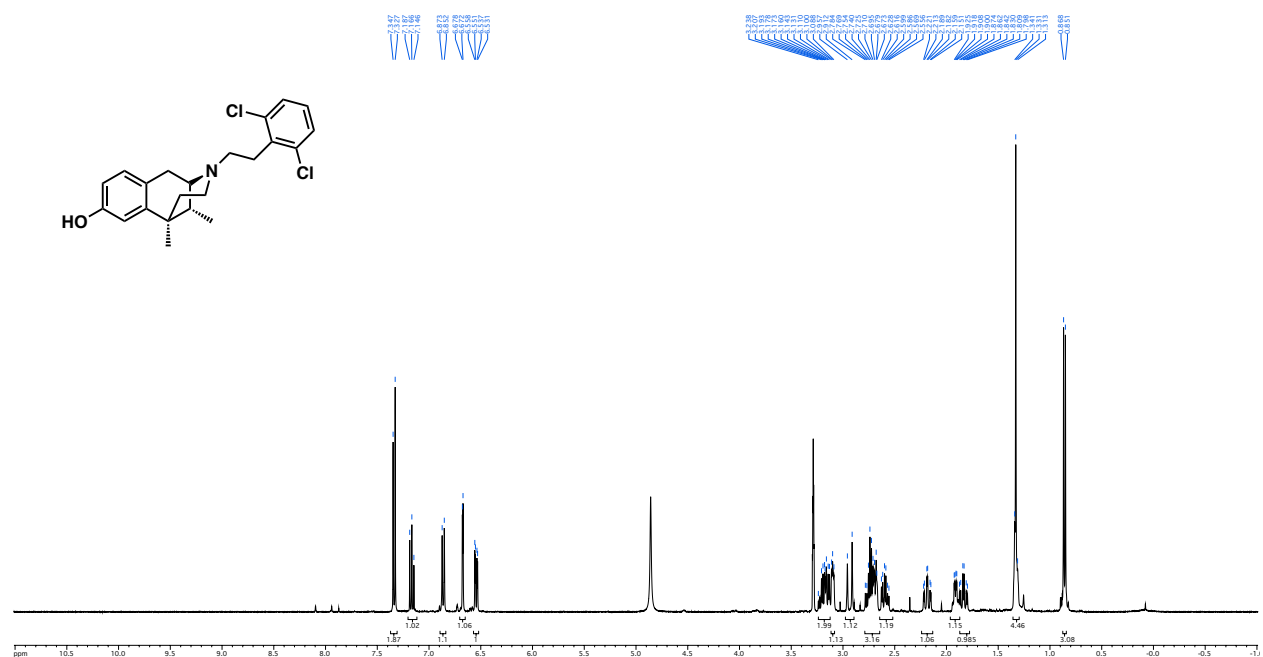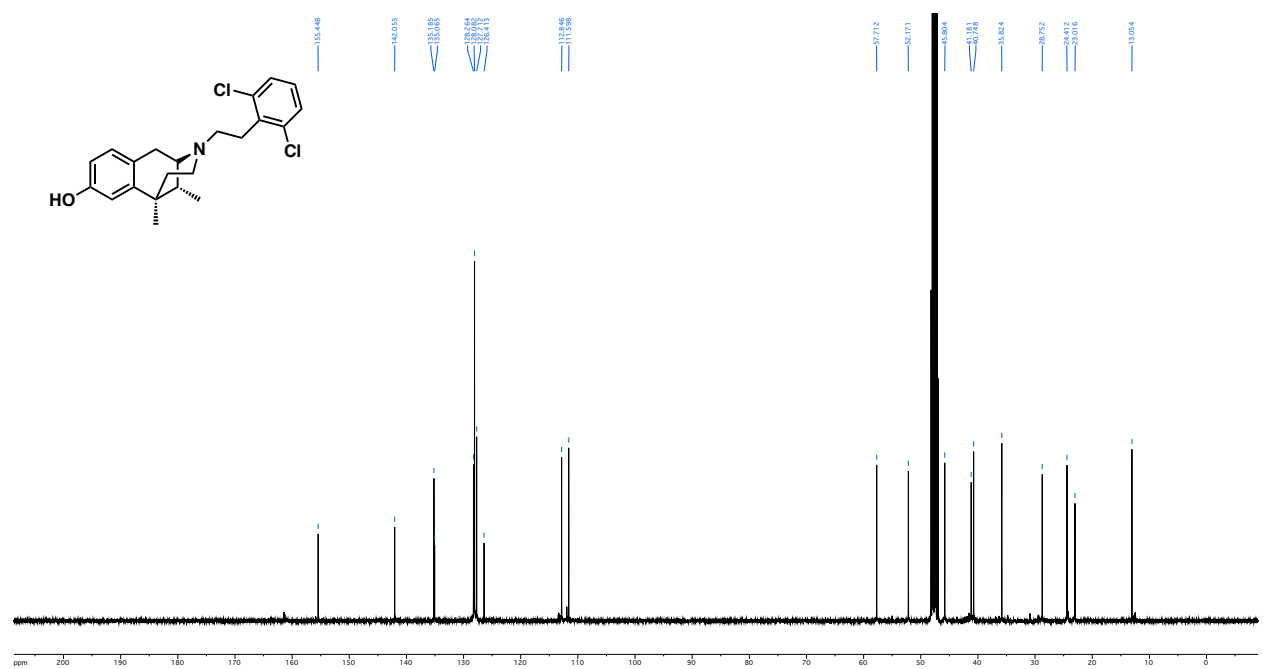

# <sup>1</sup>H NMR and <sup>13</sup>C NMR of (-)-23

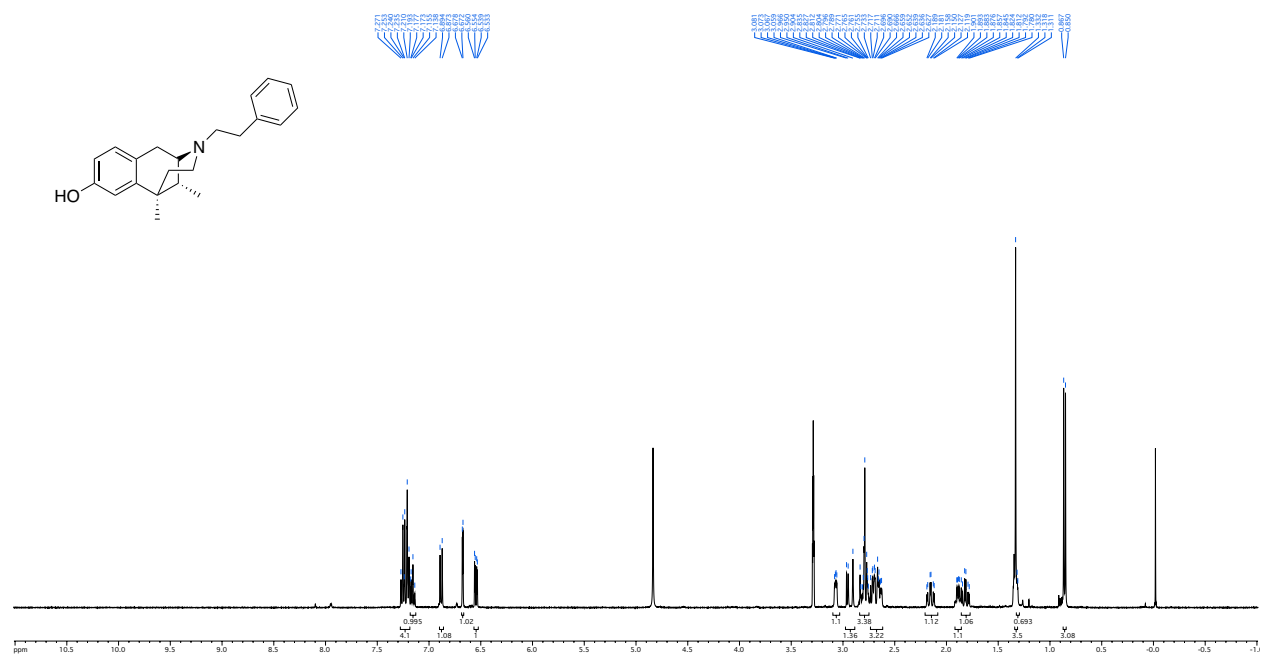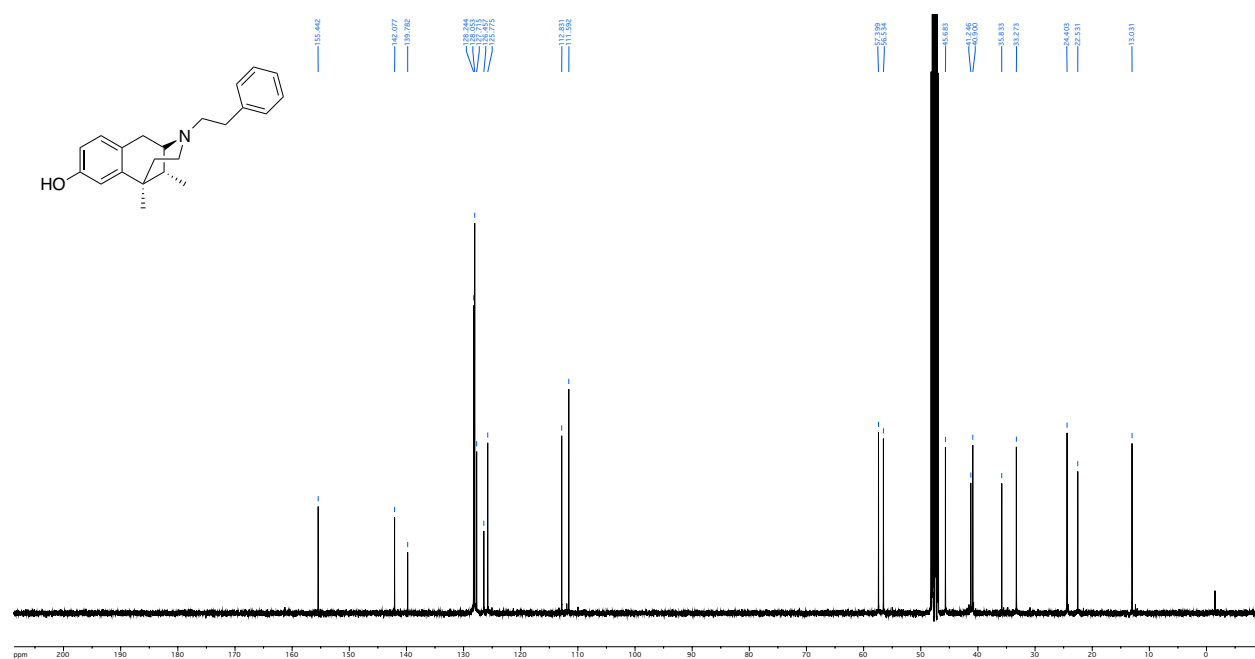

# **$^1\text{H}$ NMR and $^{13}\text{C}$ NMR of (-)-24**

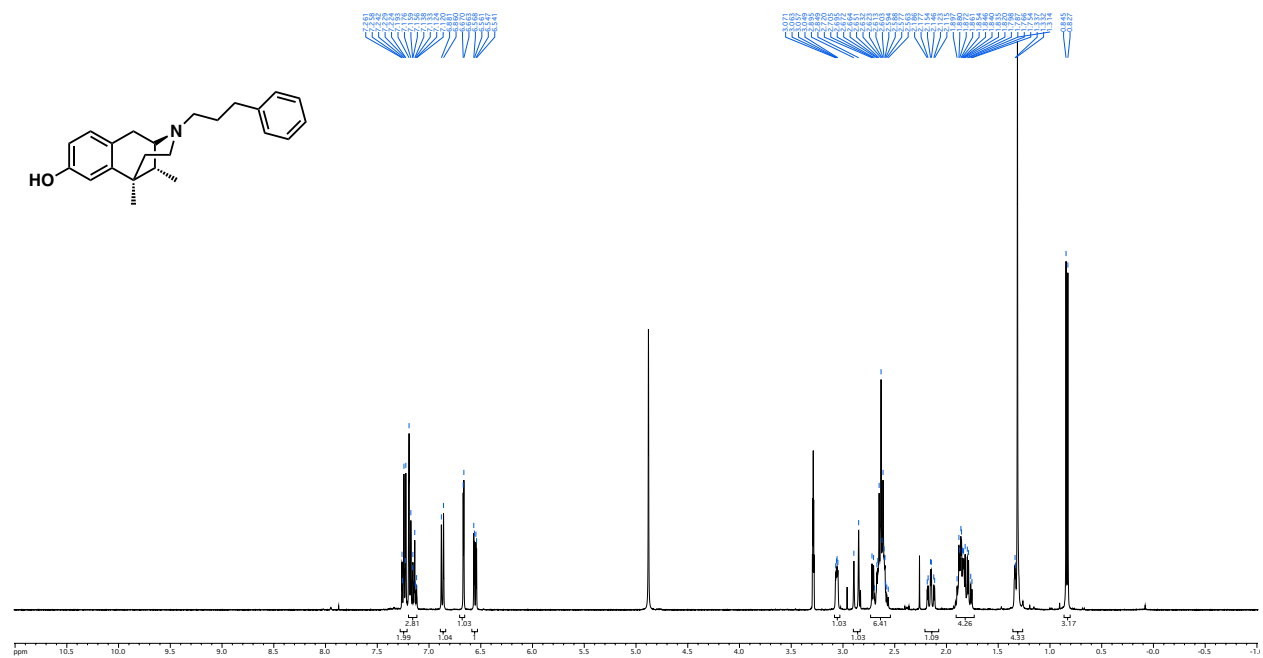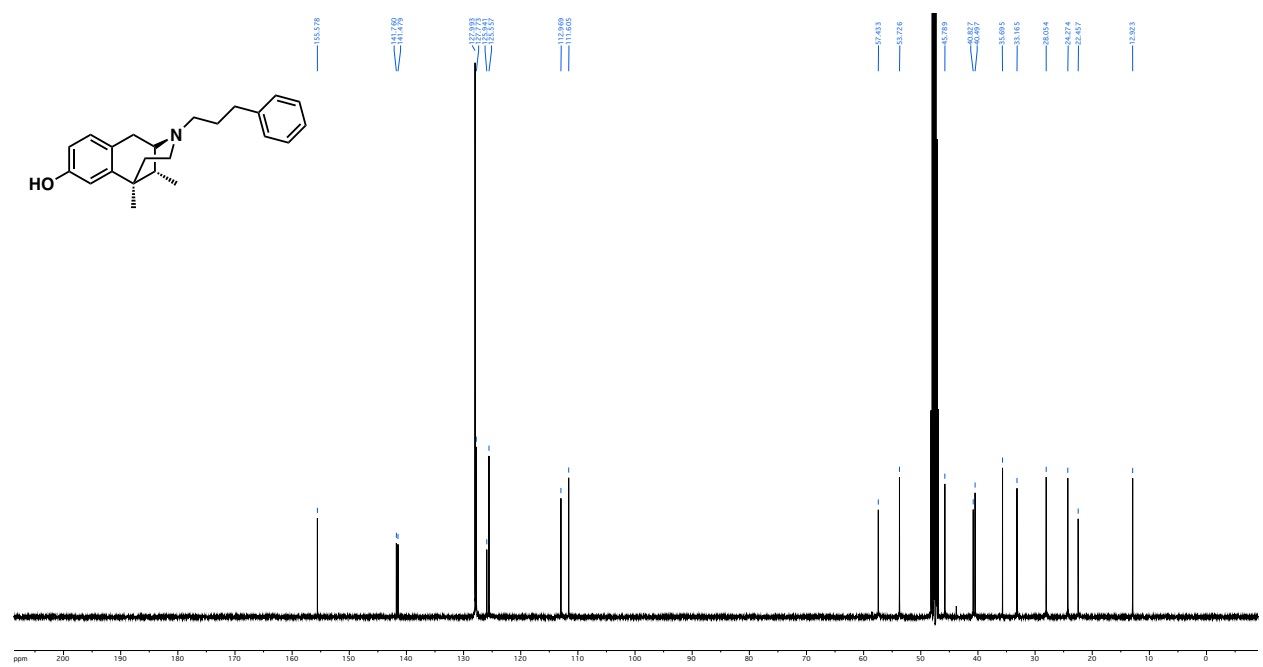

Chemical structure of (S)-1-(4-hydroxy-1,2,3,4-tetrahydronaphthalen-1-yl)-N-(3-phenylprop-1-en-1-yl)pyrrolidine is shown in the top left. The <sup>1</sup>H NMR spectrum (400 MHz, CDCl<sub>3</sub>) is displayed below, with peaks labeled by their chemical shift (ppm) and integration values.

Chemical structure: Oc1ccc2c(c1)CC[C@H]2N(C/C=C/c3ccccc3)C

<sup>1</sup>H NMR spectrum (400 MHz, CDCl<sub>3</sub>) showing peaks labeled by chemical shift (ppm) and integration values:

| Chemical Shift (ppm) | Integration |
|----------------------|-------------|
| ~7.2                 | 1.35        |
| ~7.1                 | 0.978       |
| ~6.8                 | 0.993       |
| ~6.5                 | 1.53        |
| ~6.4                 | 0.989       |
| ~6.2                 | 1           |
| ~5.0                 | 1.01        |
| ~4.8                 | 1.995       |
| ~4.6                 | 2.02        |
| ~4.4                 | 0.999       |
| ~4.2                 | 0.988       |
| ~4.0                 | 1.002       |
| ~3.8                 | 1.01        |
| ~3.6                 | 1.01        |
| ~3.4                 | 1.09        |
| ~3.2                 | 1.06        |
| ~2.8                 | 3           |

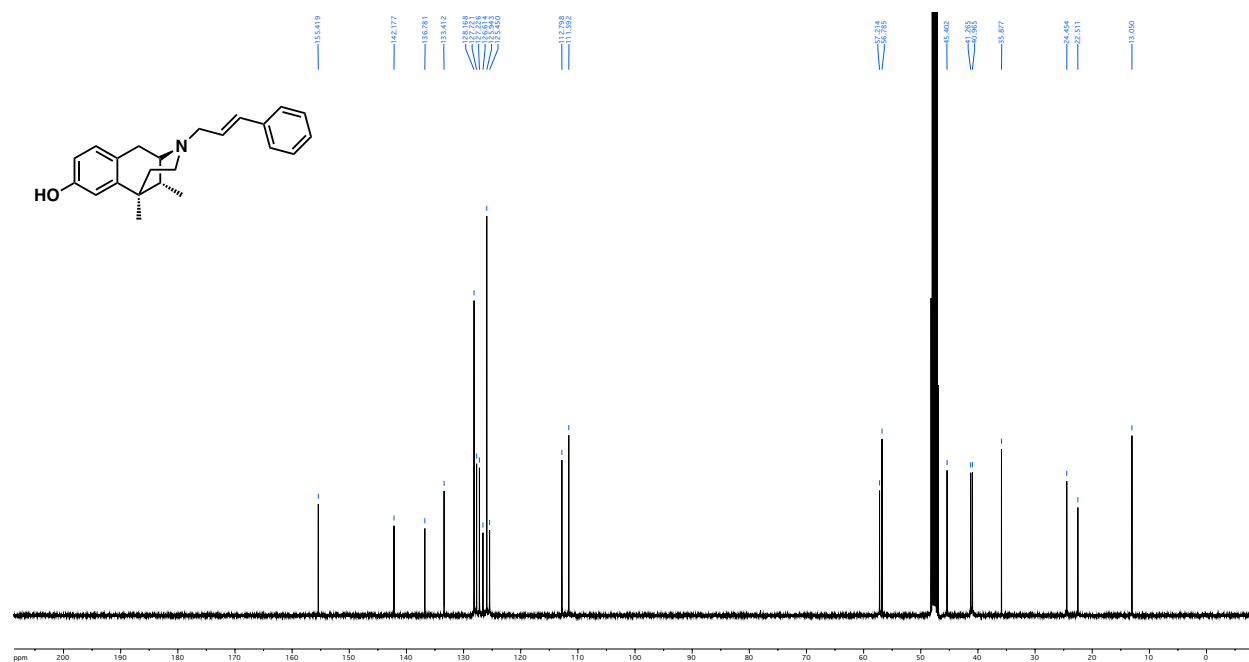

# <sup>1</sup>H NMR and <sup>13</sup>C NMR of (–)-26

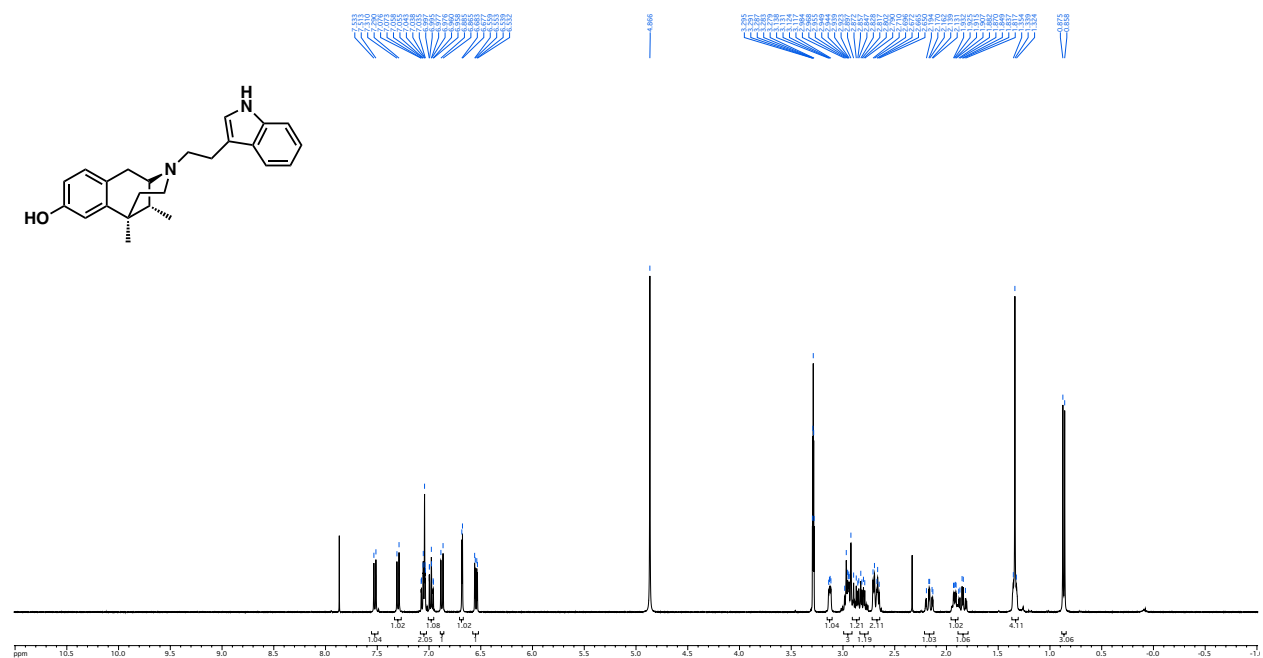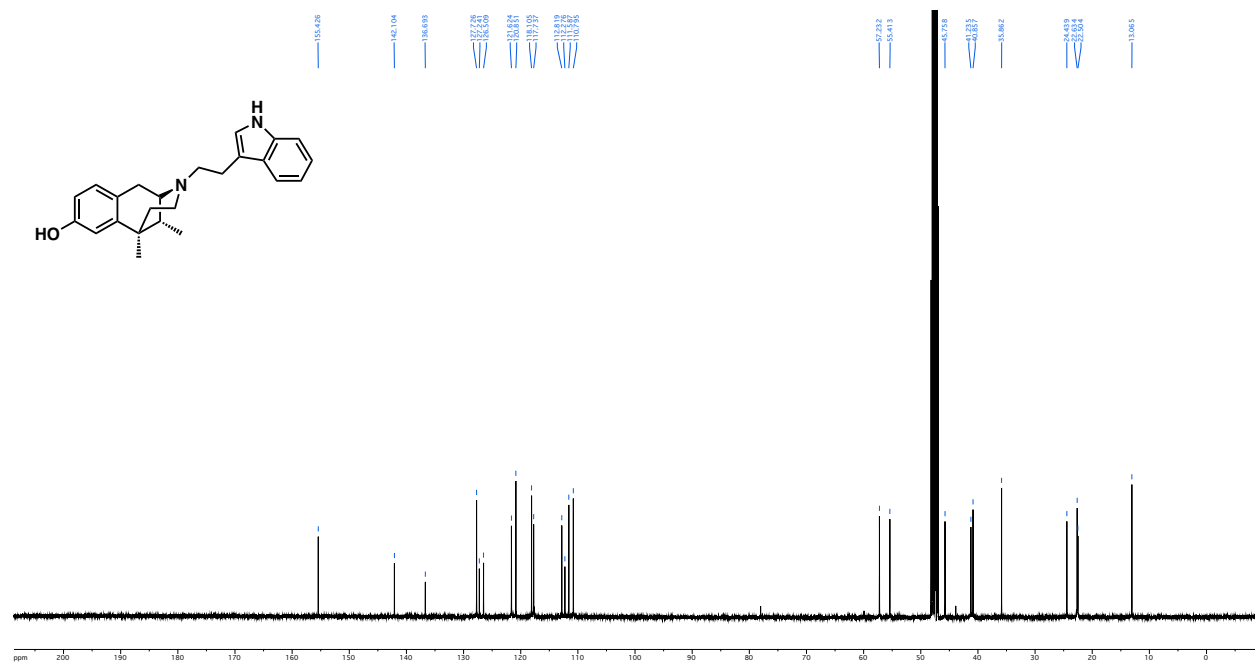

# <sup>1</sup>H NMR and <sup>13</sup>C NMR of (–)-27

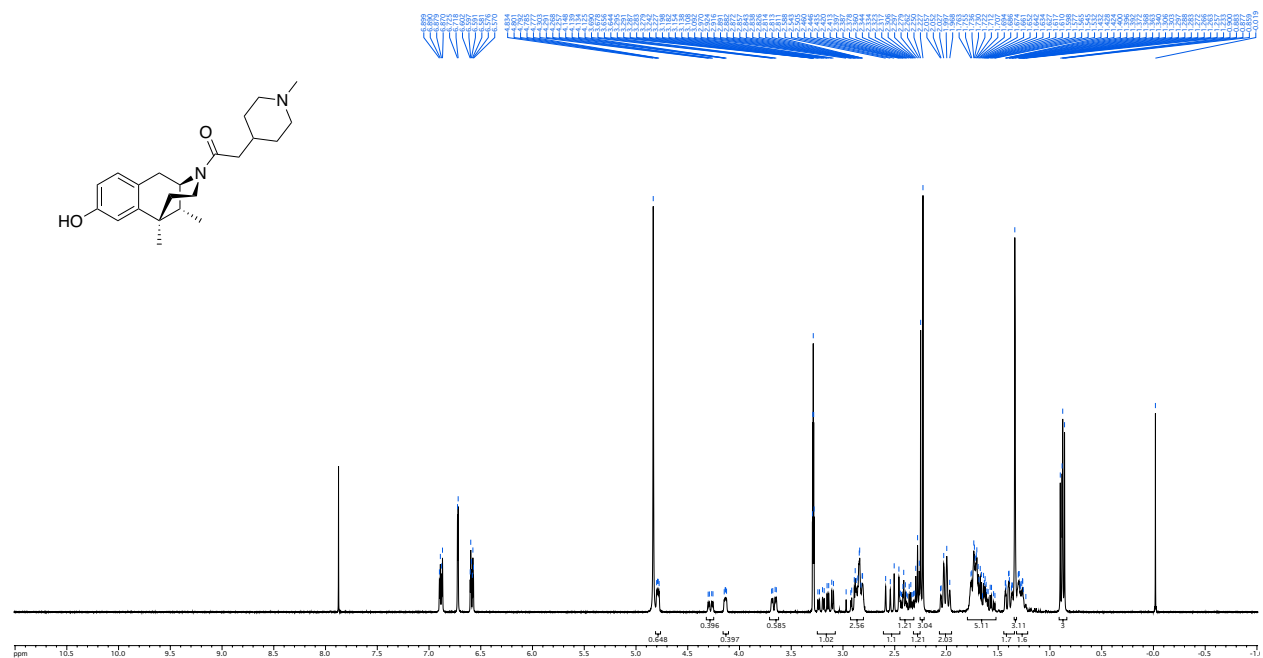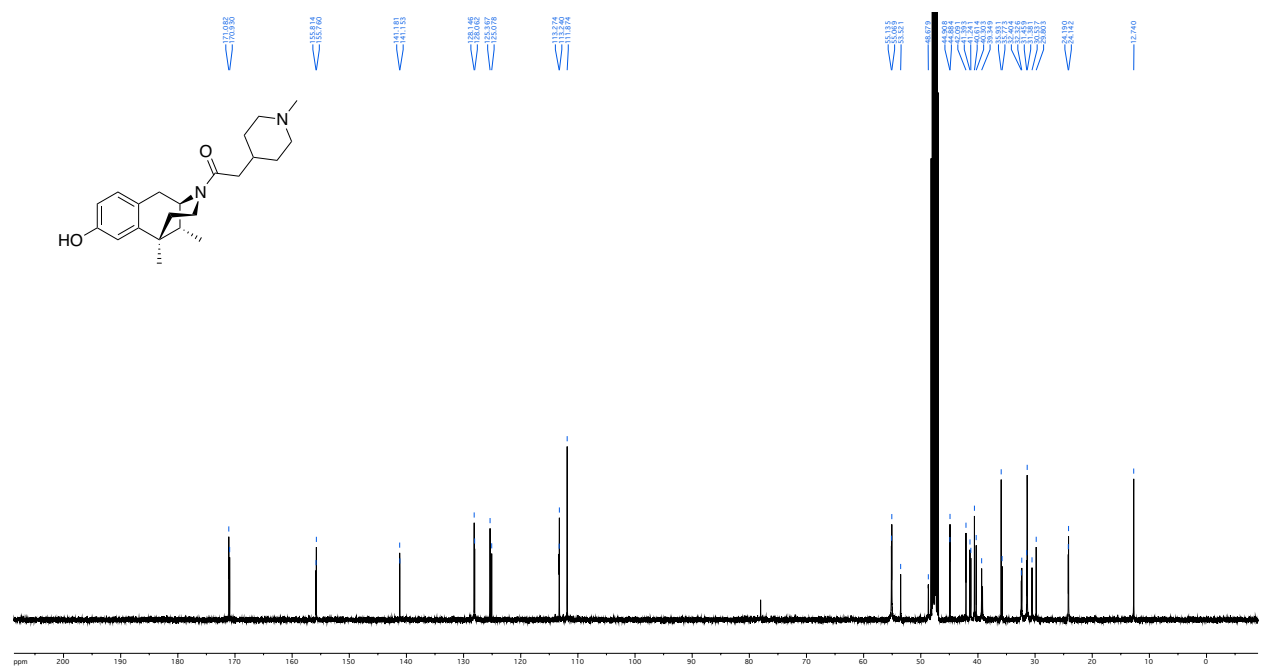

# <sup>1</sup>H NMR and <sup>13</sup>C NMR of (-)-28

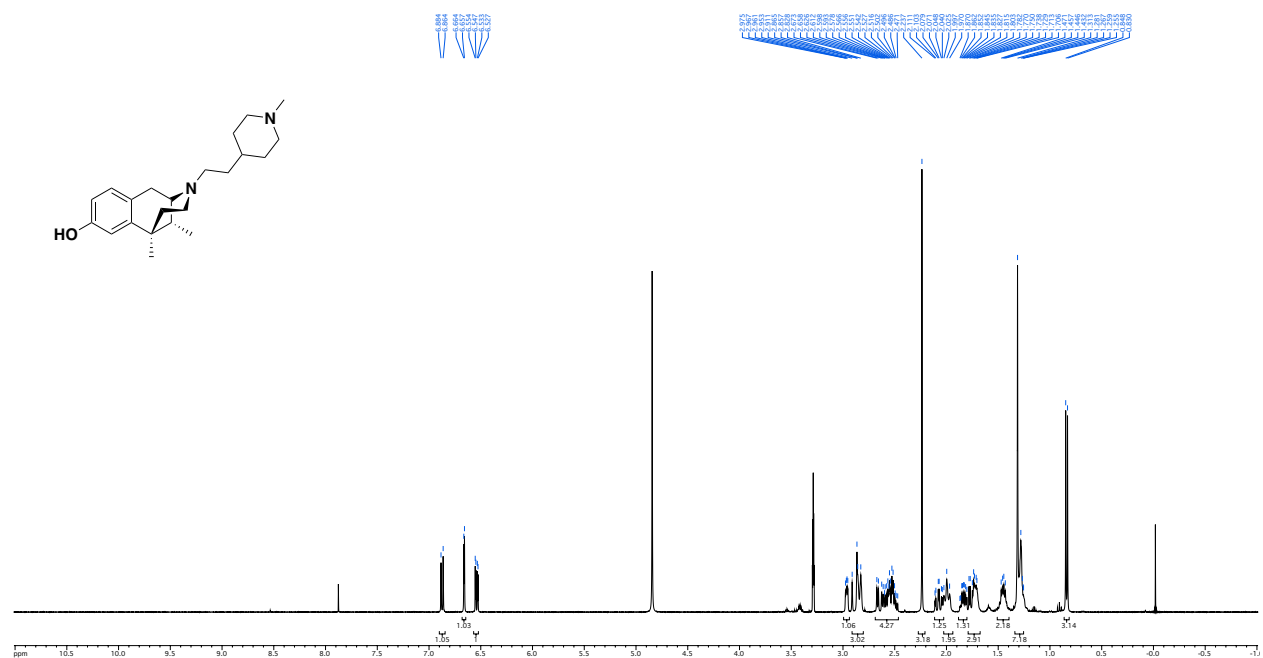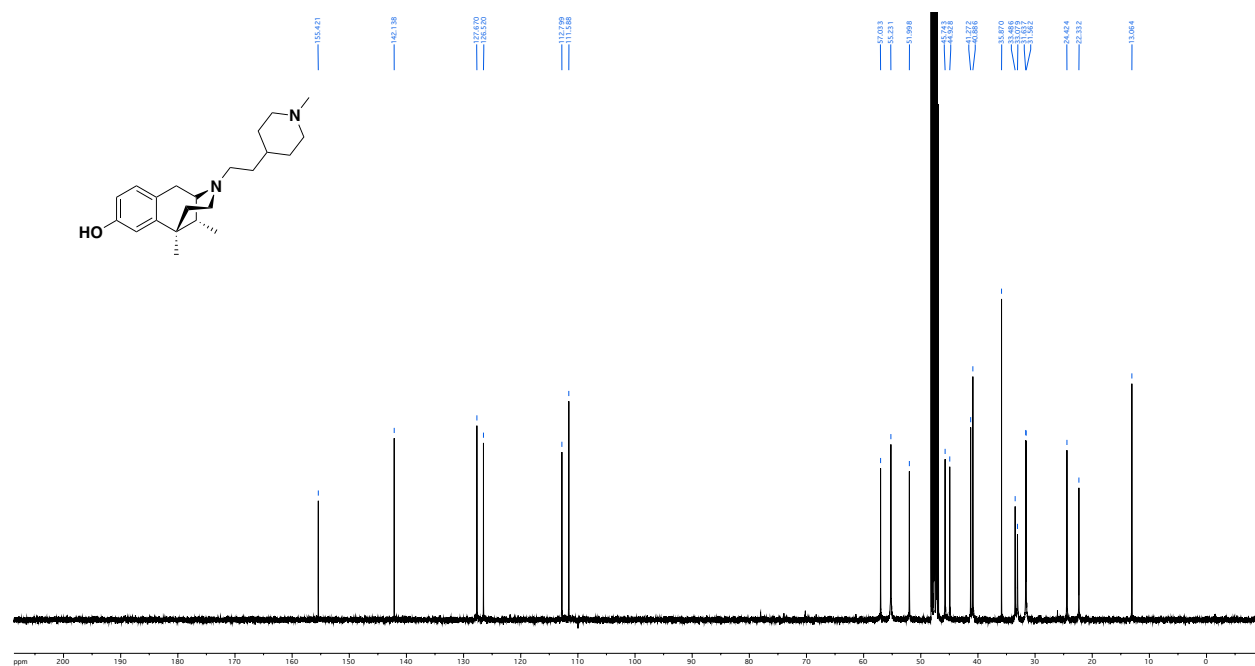



# <sup>1</sup>H NMR and <sup>13</sup>C NMR of 30

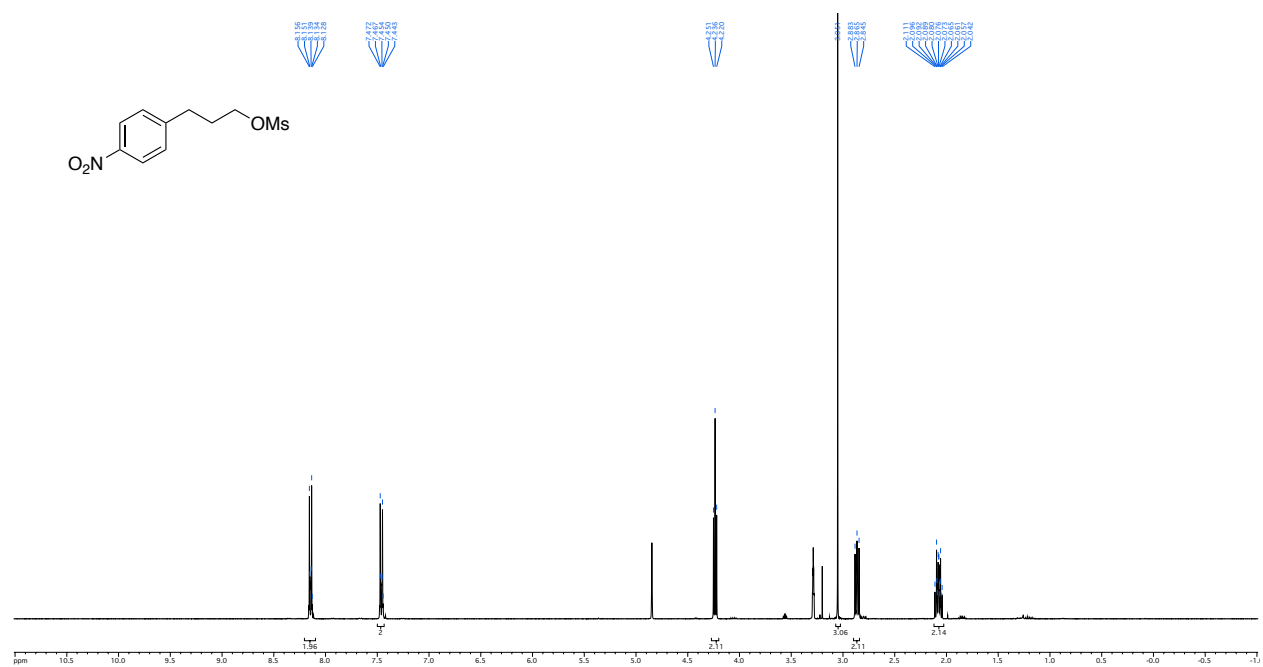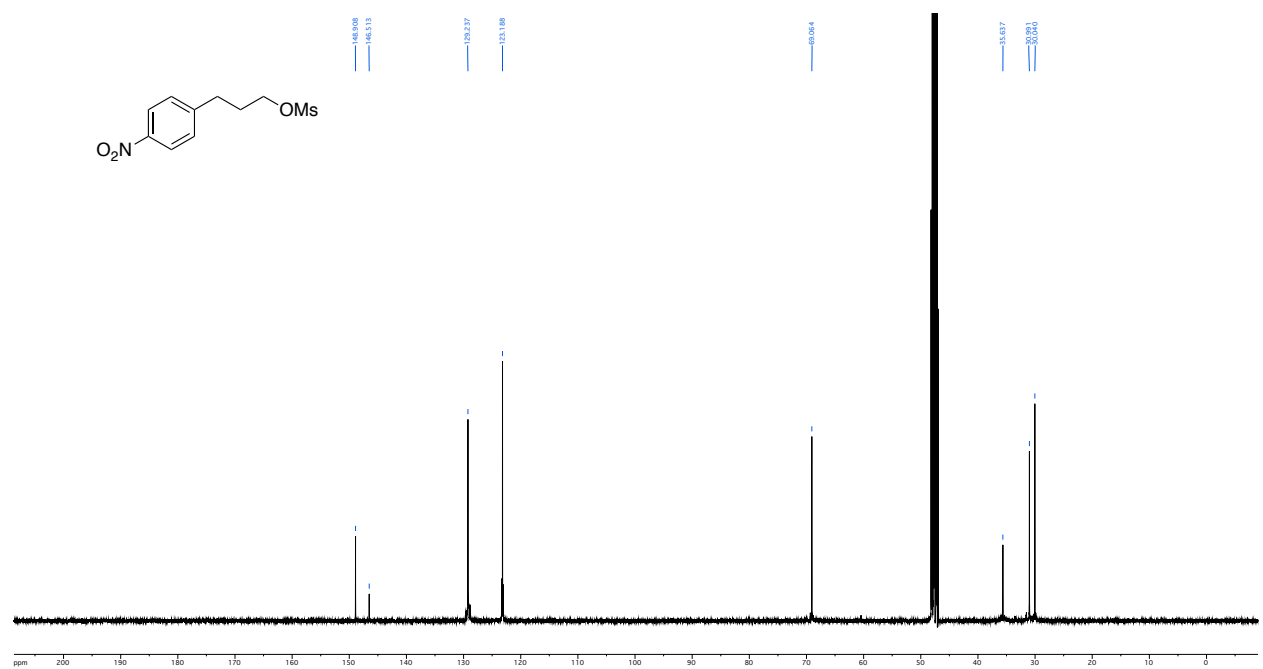

# <sup>1</sup>H NMR and <sup>13</sup>C NMR of (-)-31

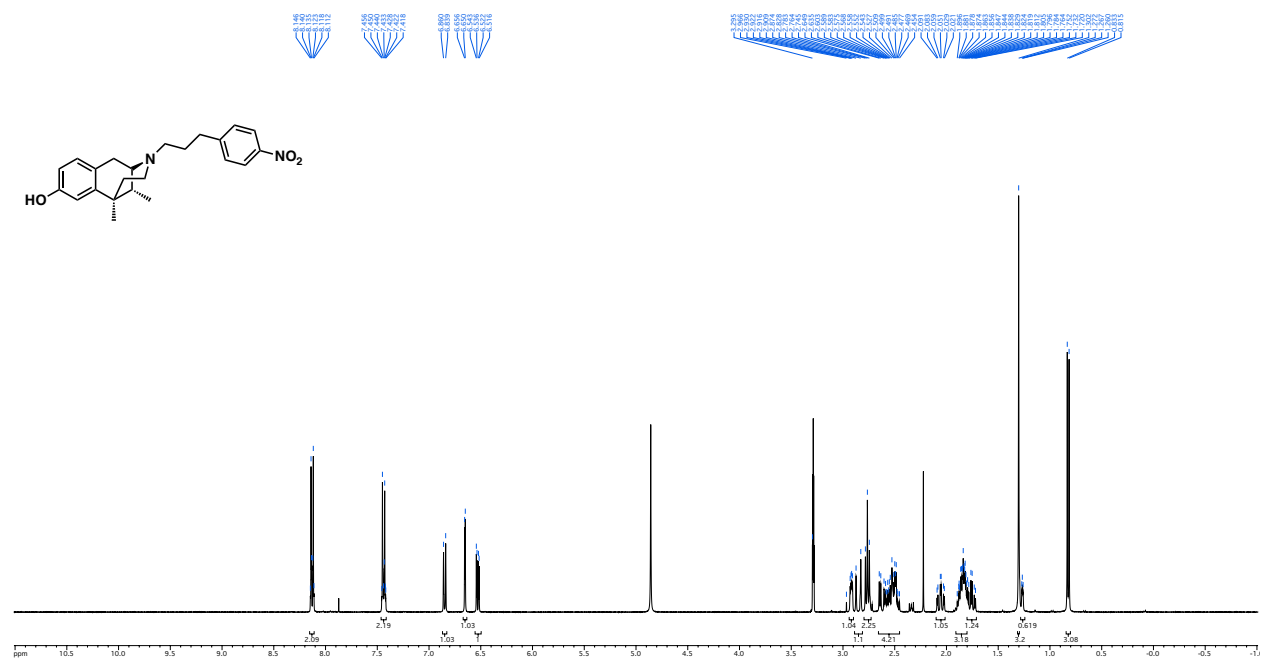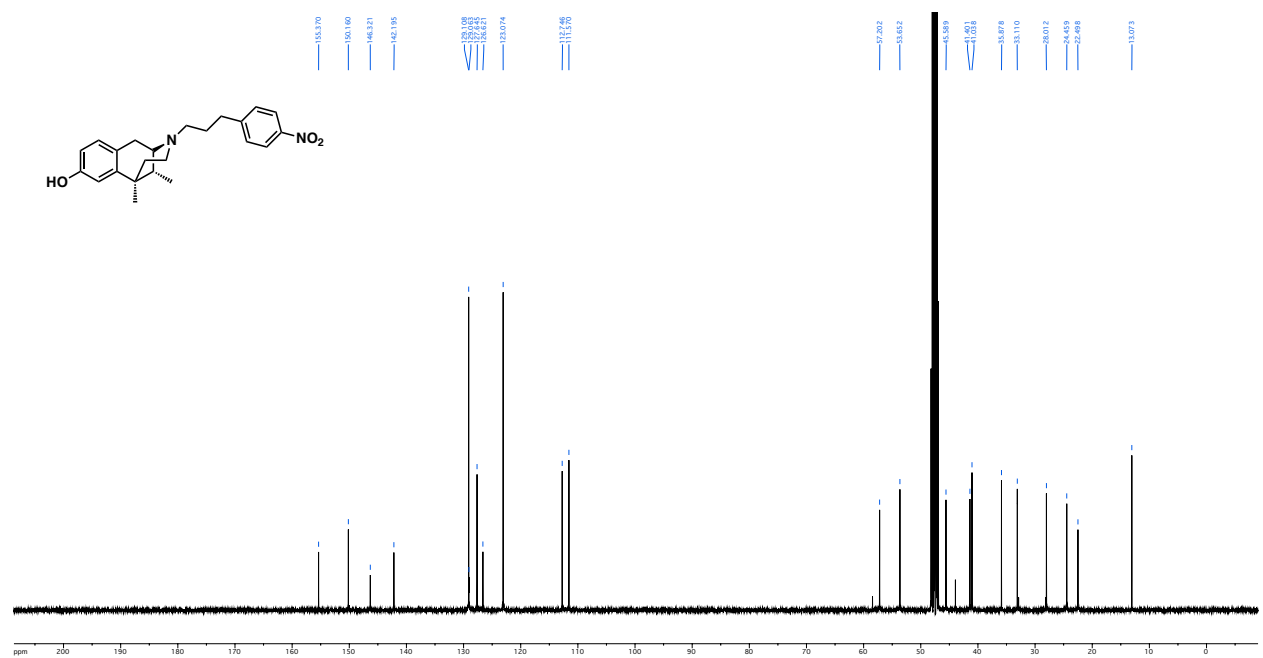

# <sup>1</sup>H NMR and <sup>13</sup>C NMR of 32

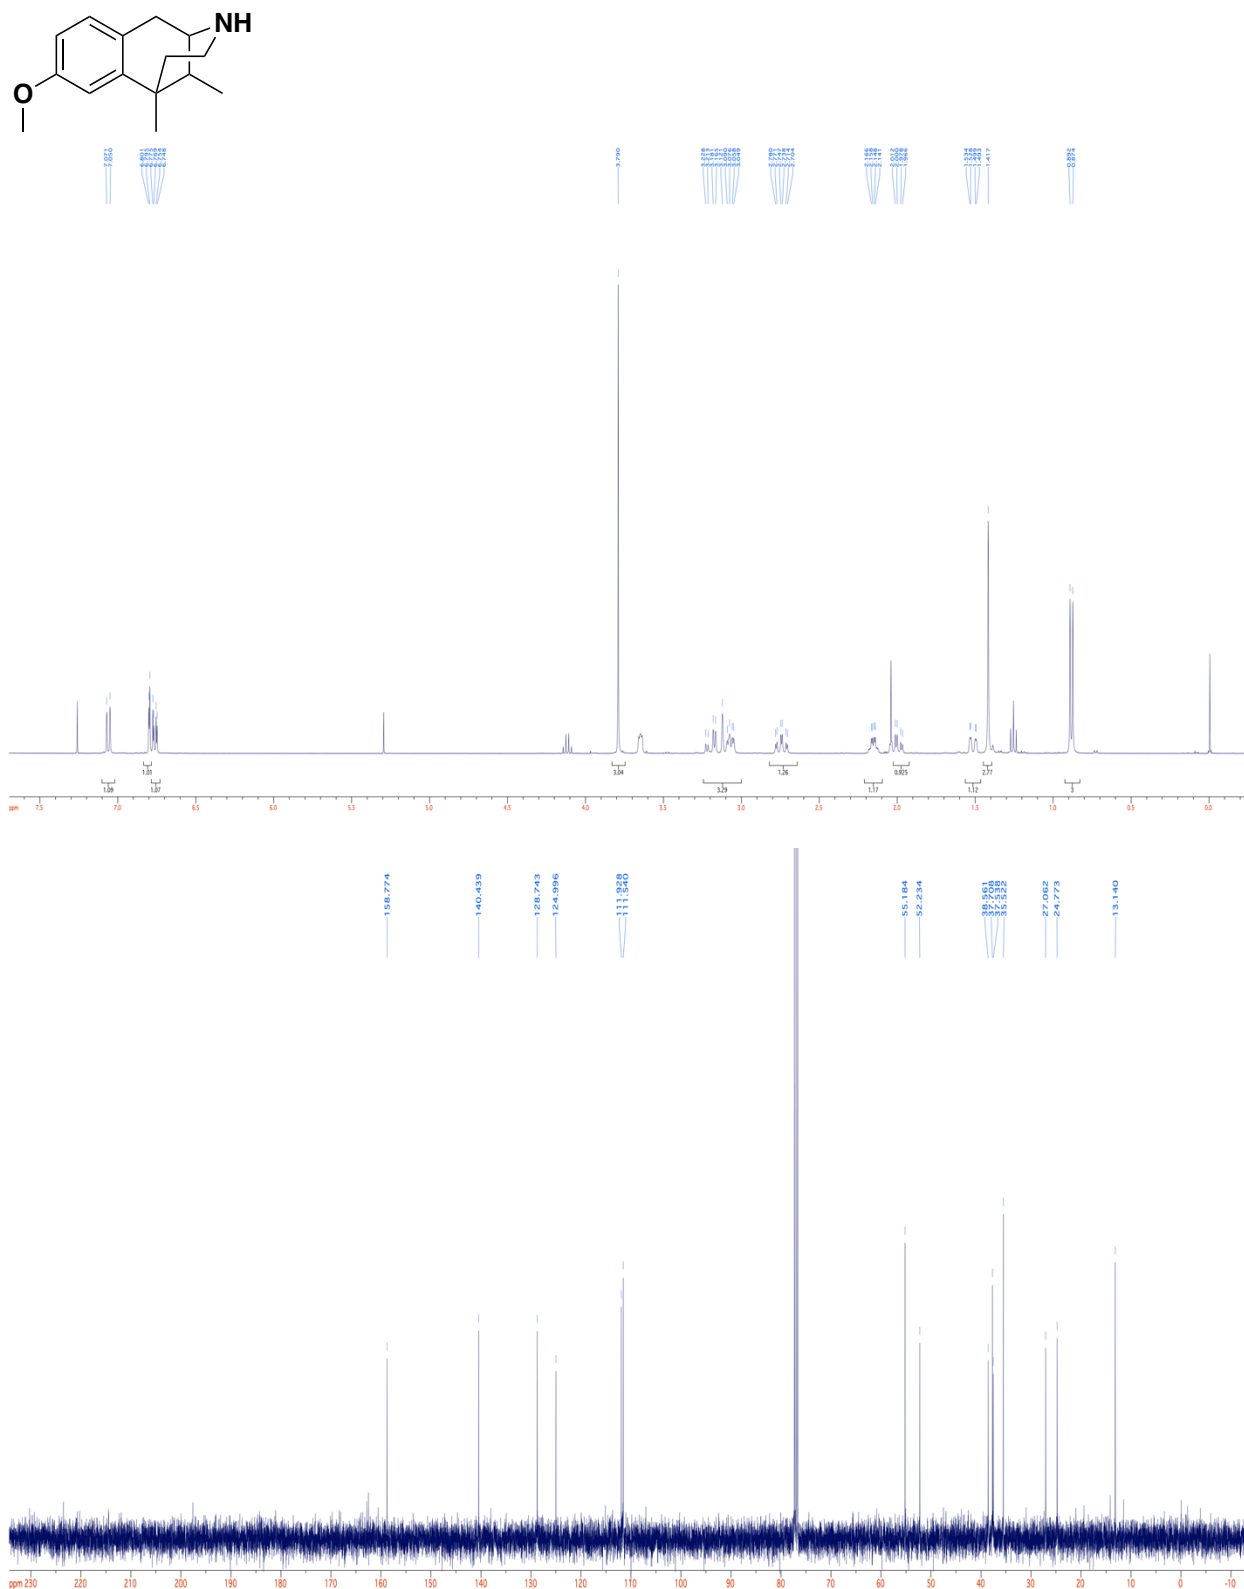

# <sup>1</sup>H NMR and <sup>13</sup>C NMR of 33

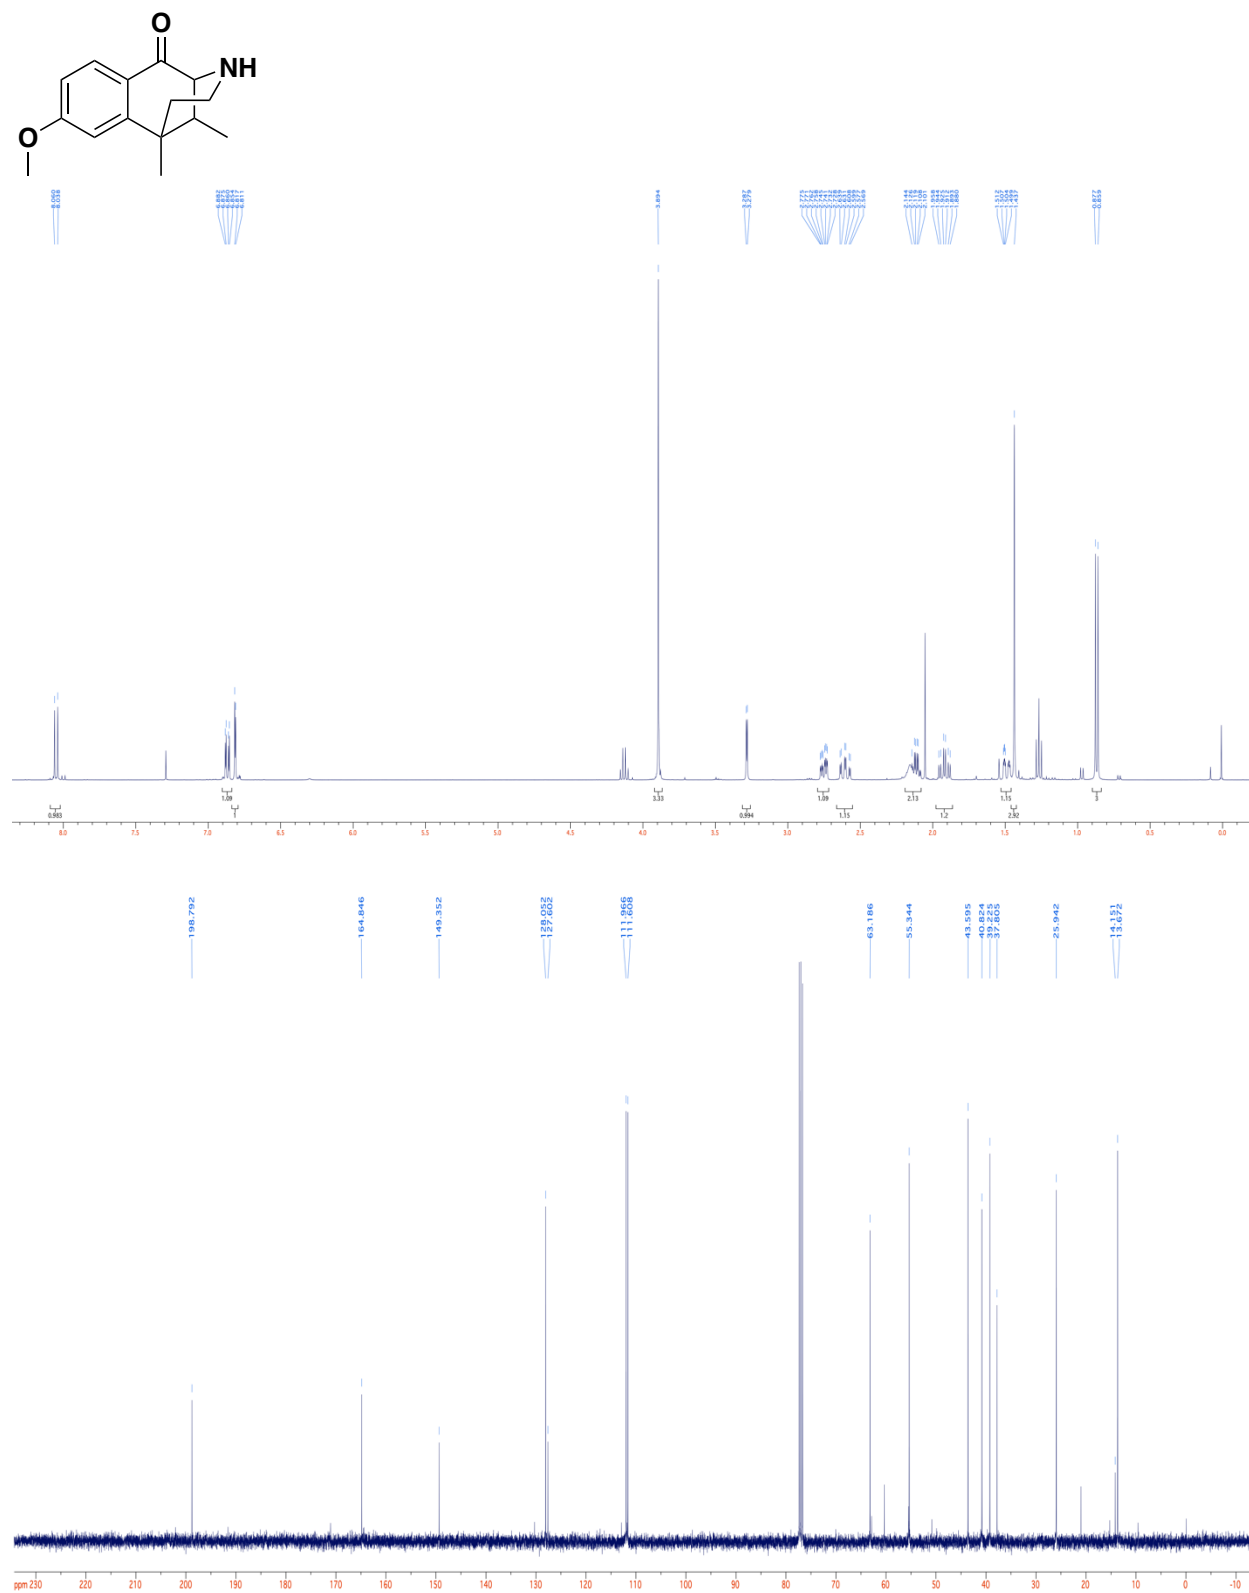

O=C1C(=O)C2=C(C1)C(=C(C=C2)OC)N(CC3=CC=CC=C3)C4(C)CC5C(C4)C(=O)C5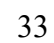

## Optical resolution of *rac*-34

Using **1** as resolving agent

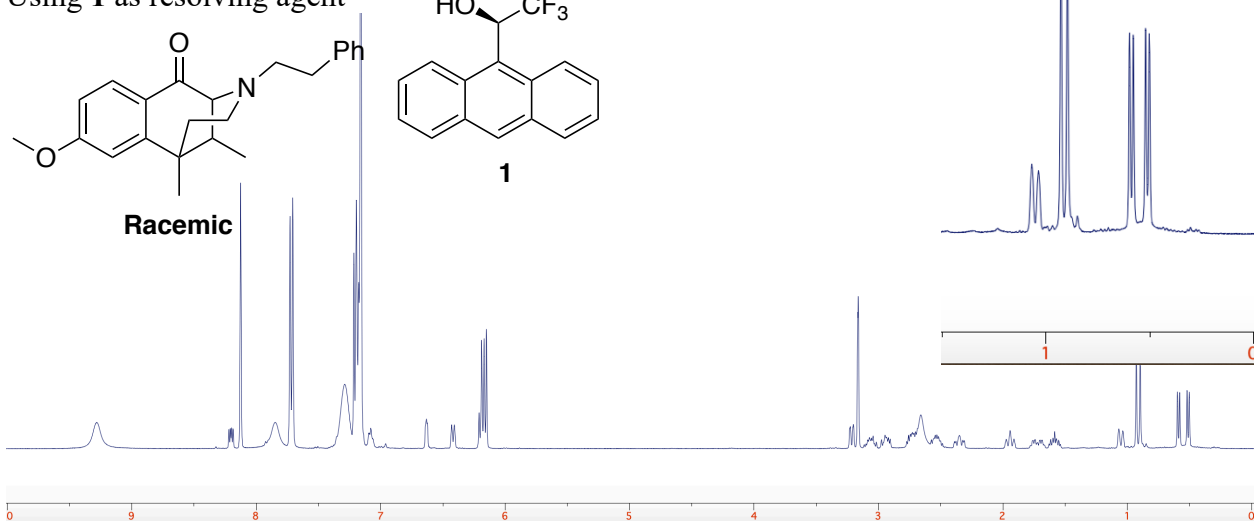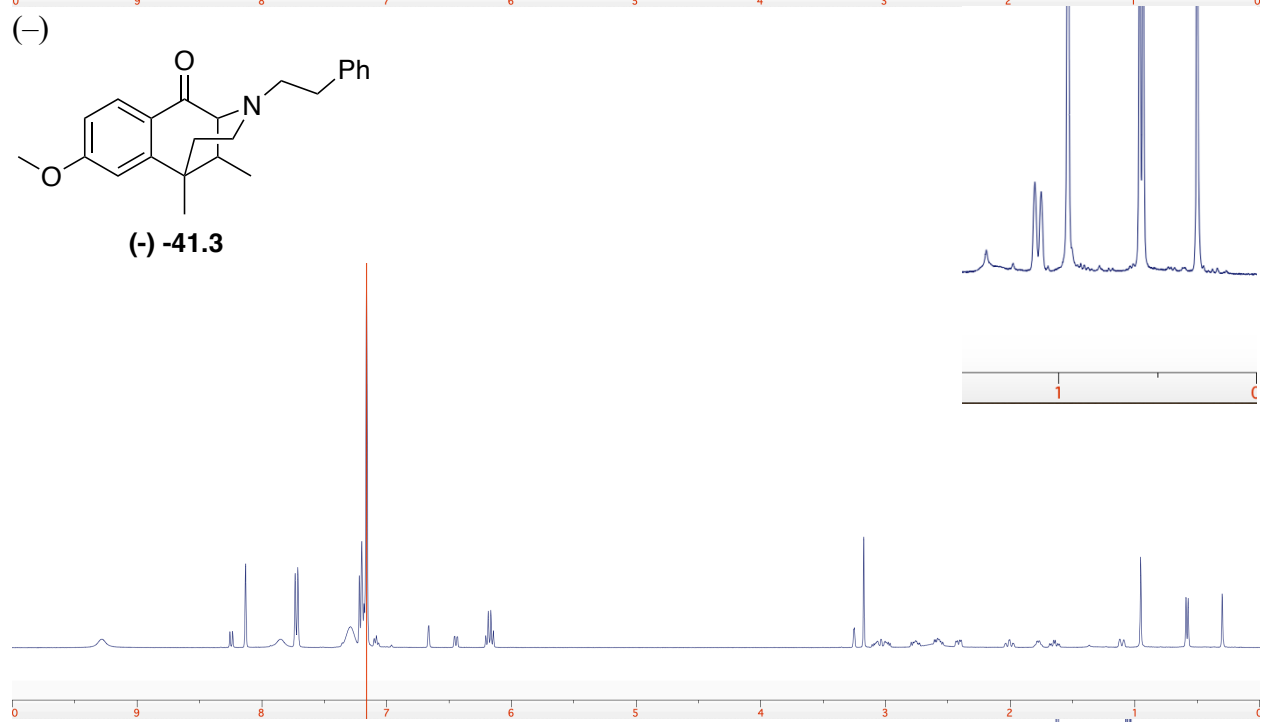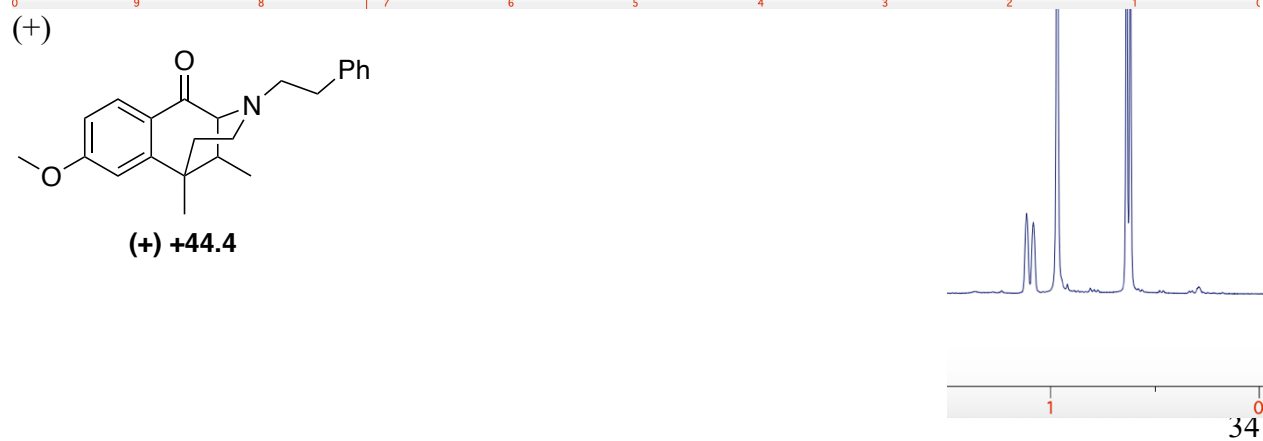

# <sup>1</sup>H NMR and <sup>13</sup>C NMR of (–)-34

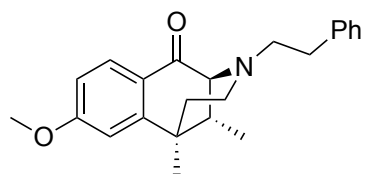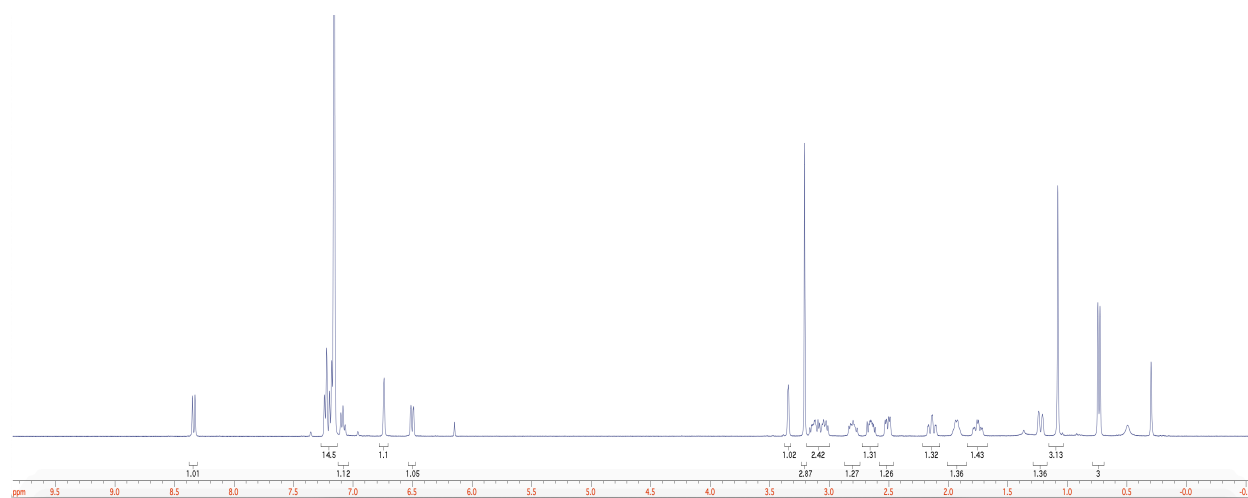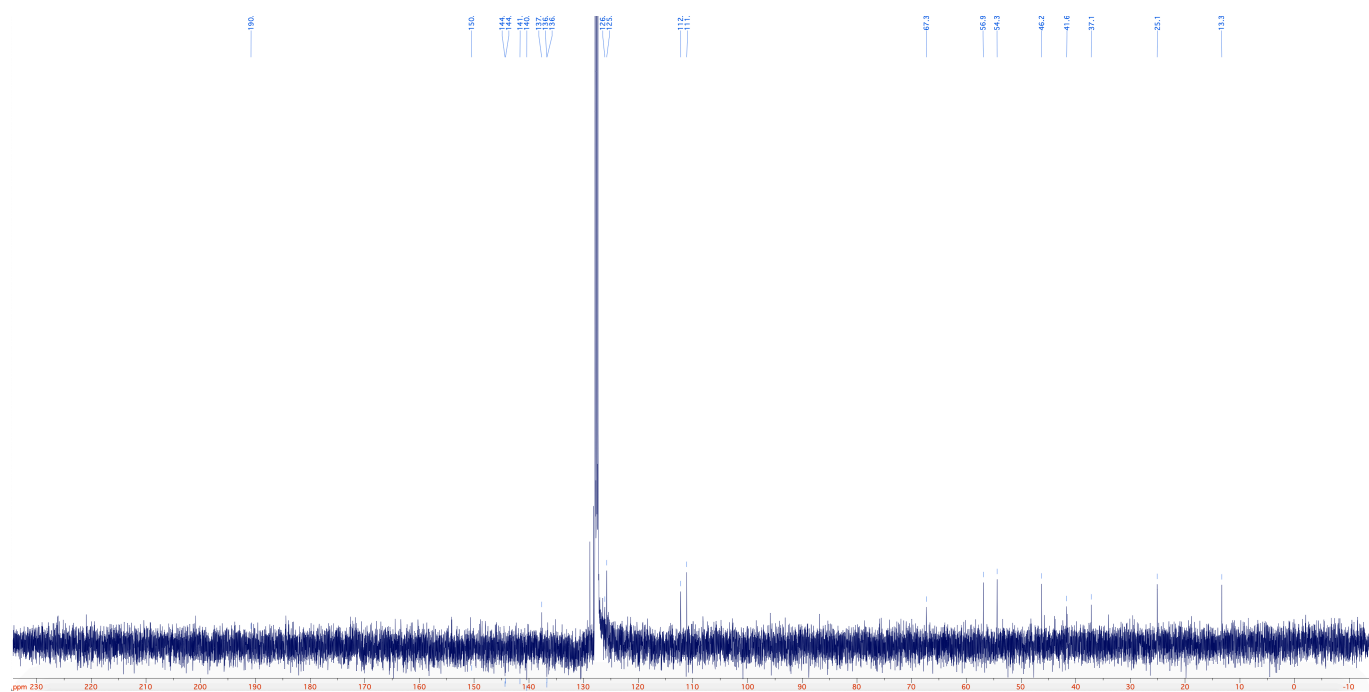

# <sup>1</sup>H NMR and <sup>13</sup>C NMR of (+)-34

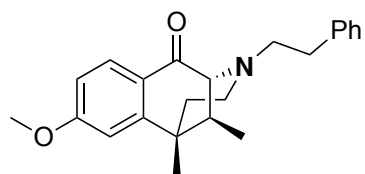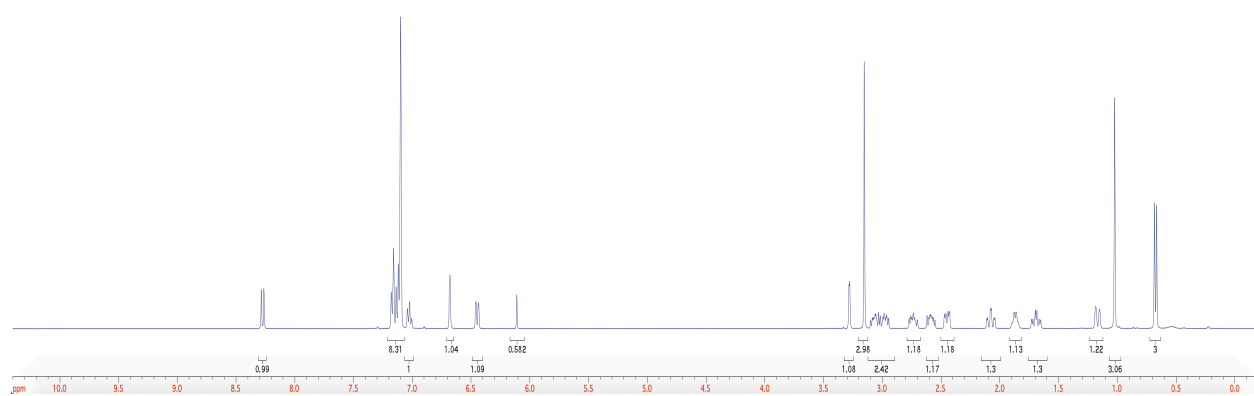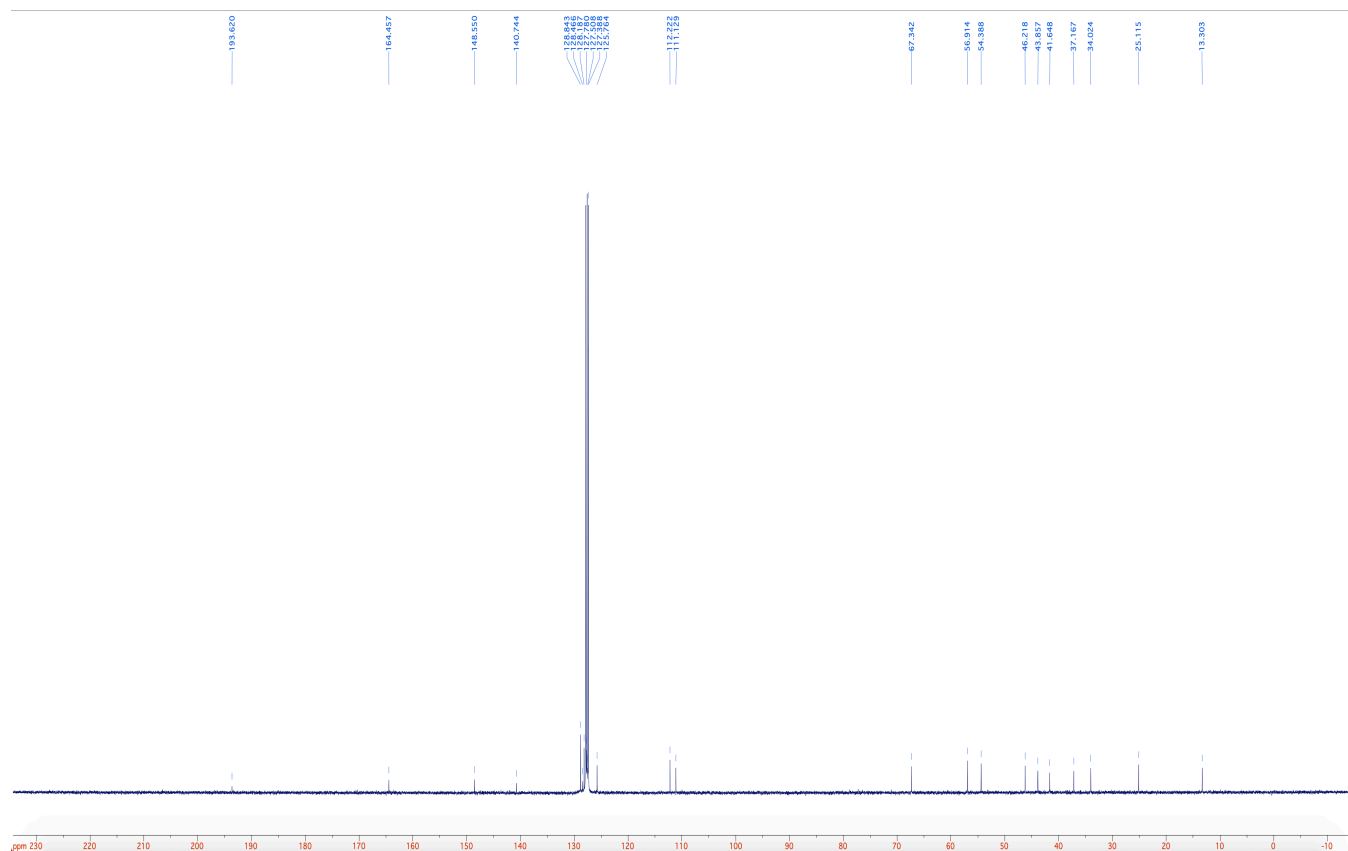



# <sup>1</sup>H NMR and <sup>13</sup>C NMR of (-)-37

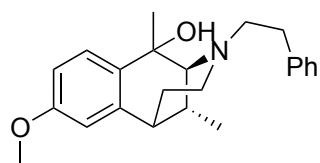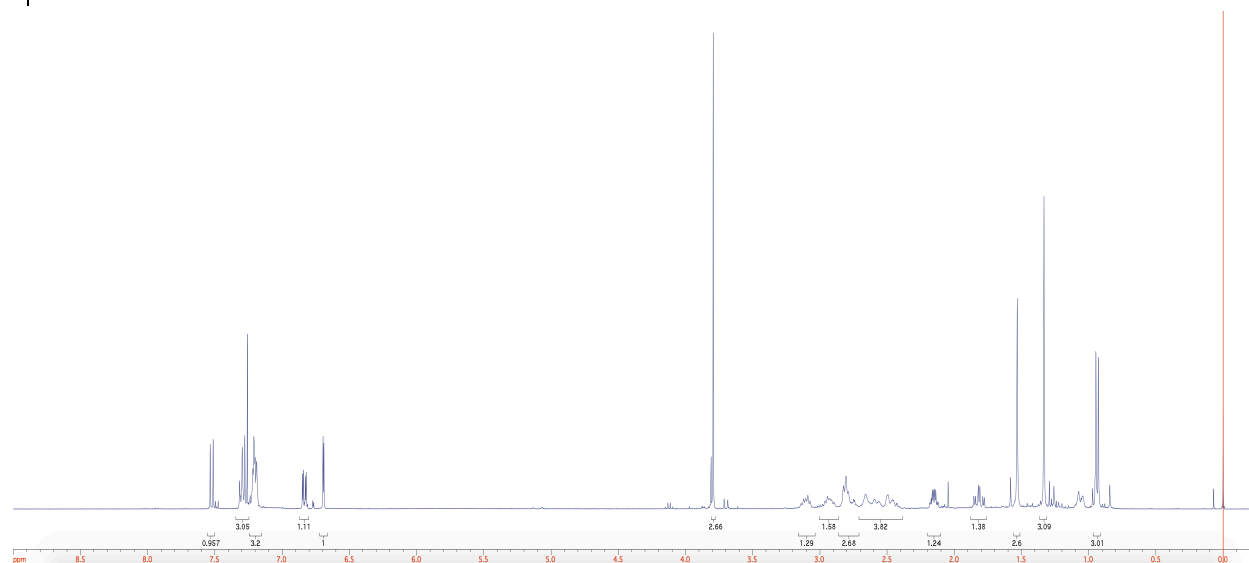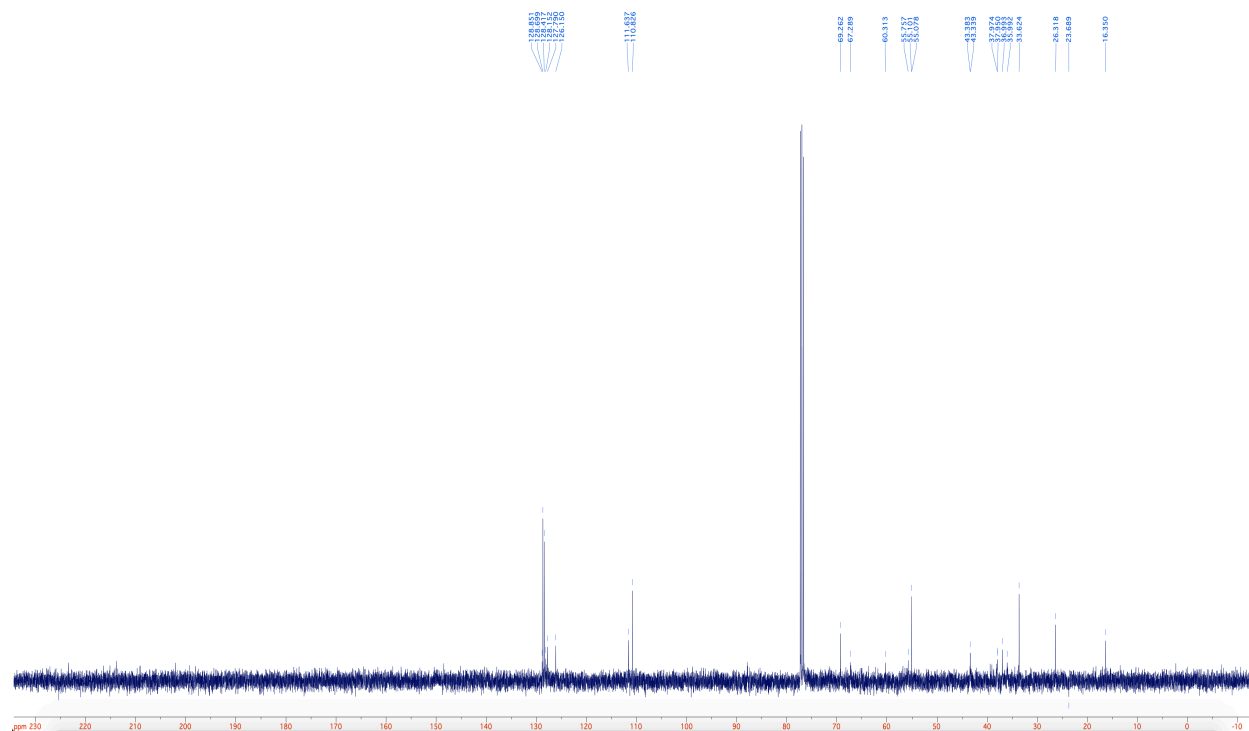

# <sup>1</sup>H NMR and <sup>13</sup>C NMR of (+)-37

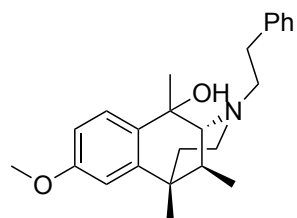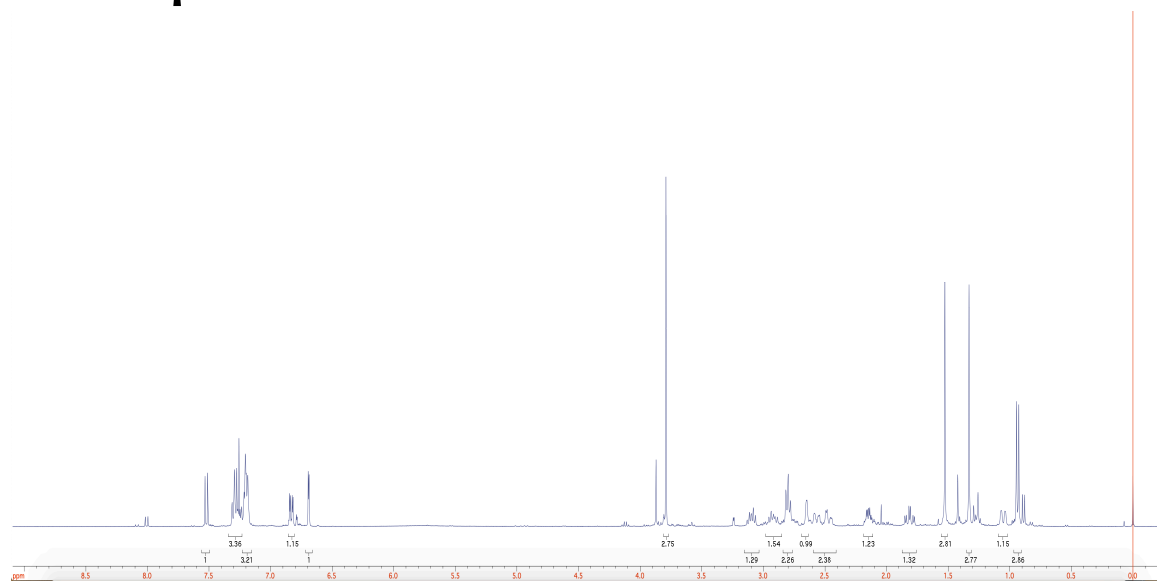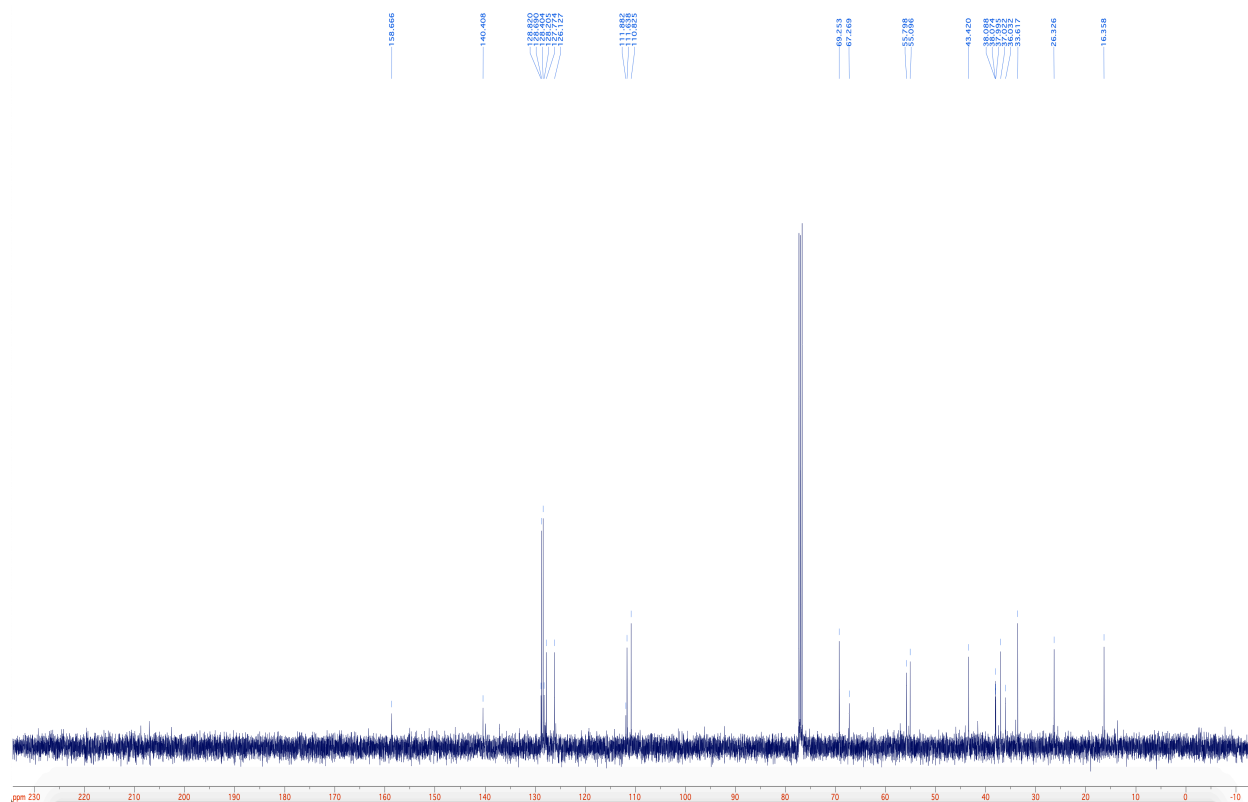

# <sup>1</sup>H NMR and <sup>13</sup>C NMR of (-)-38

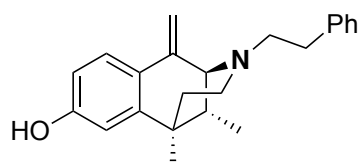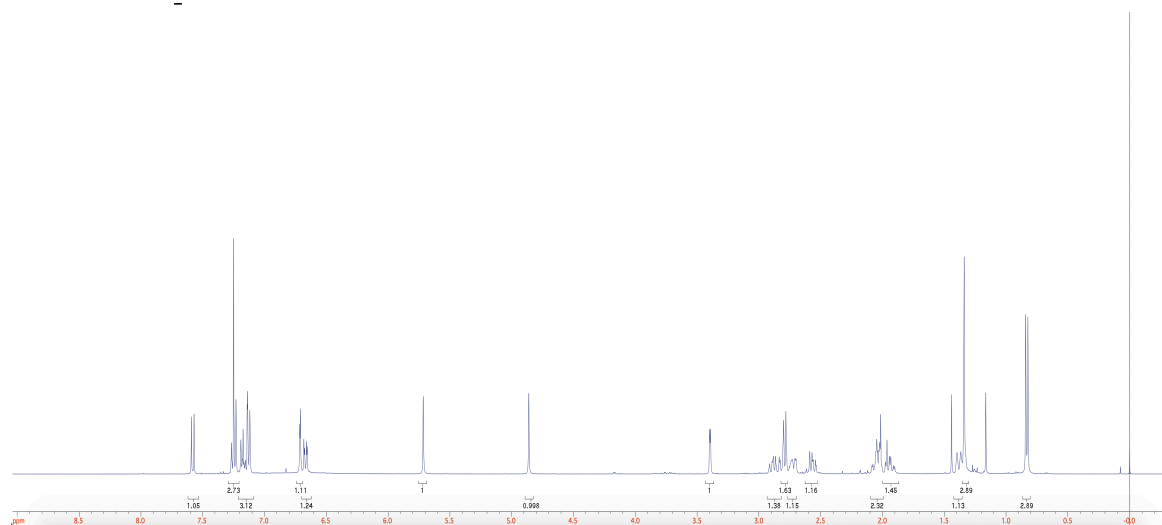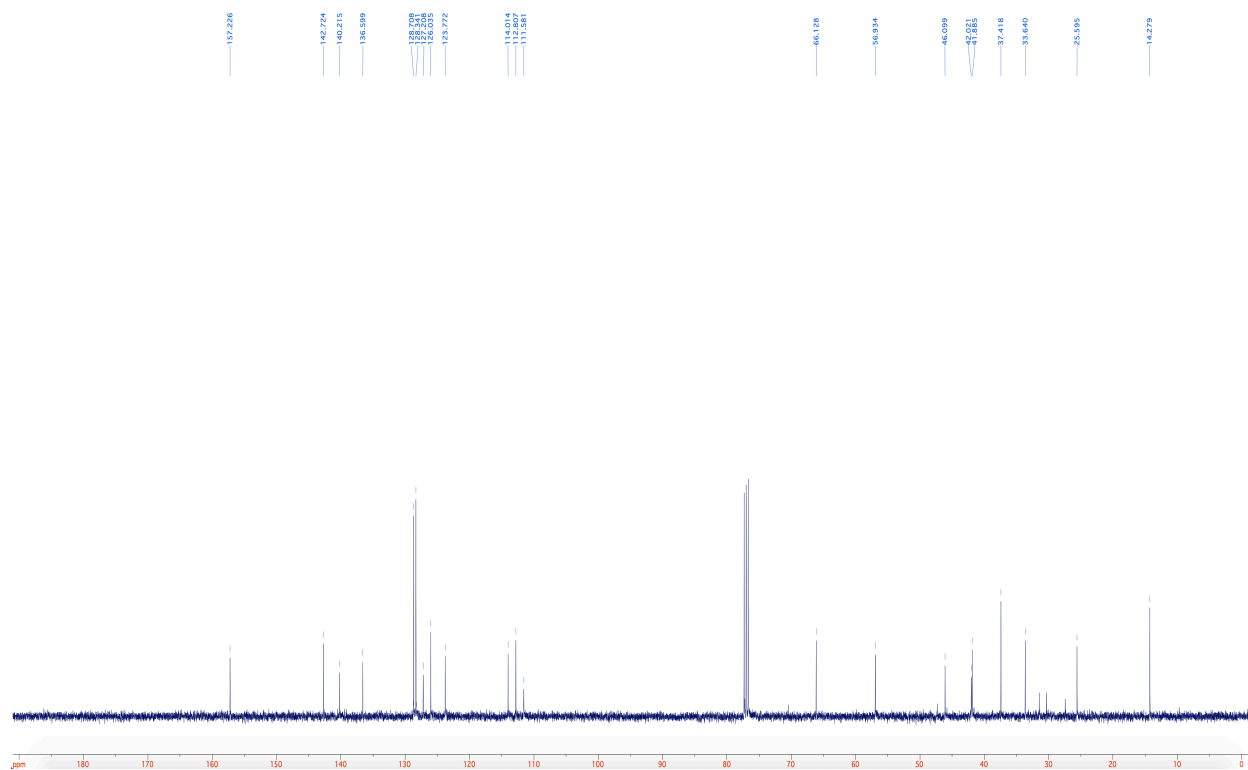

# <sup>1</sup>H NMR and <sup>13</sup>C NMR of (+)-38

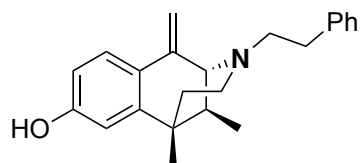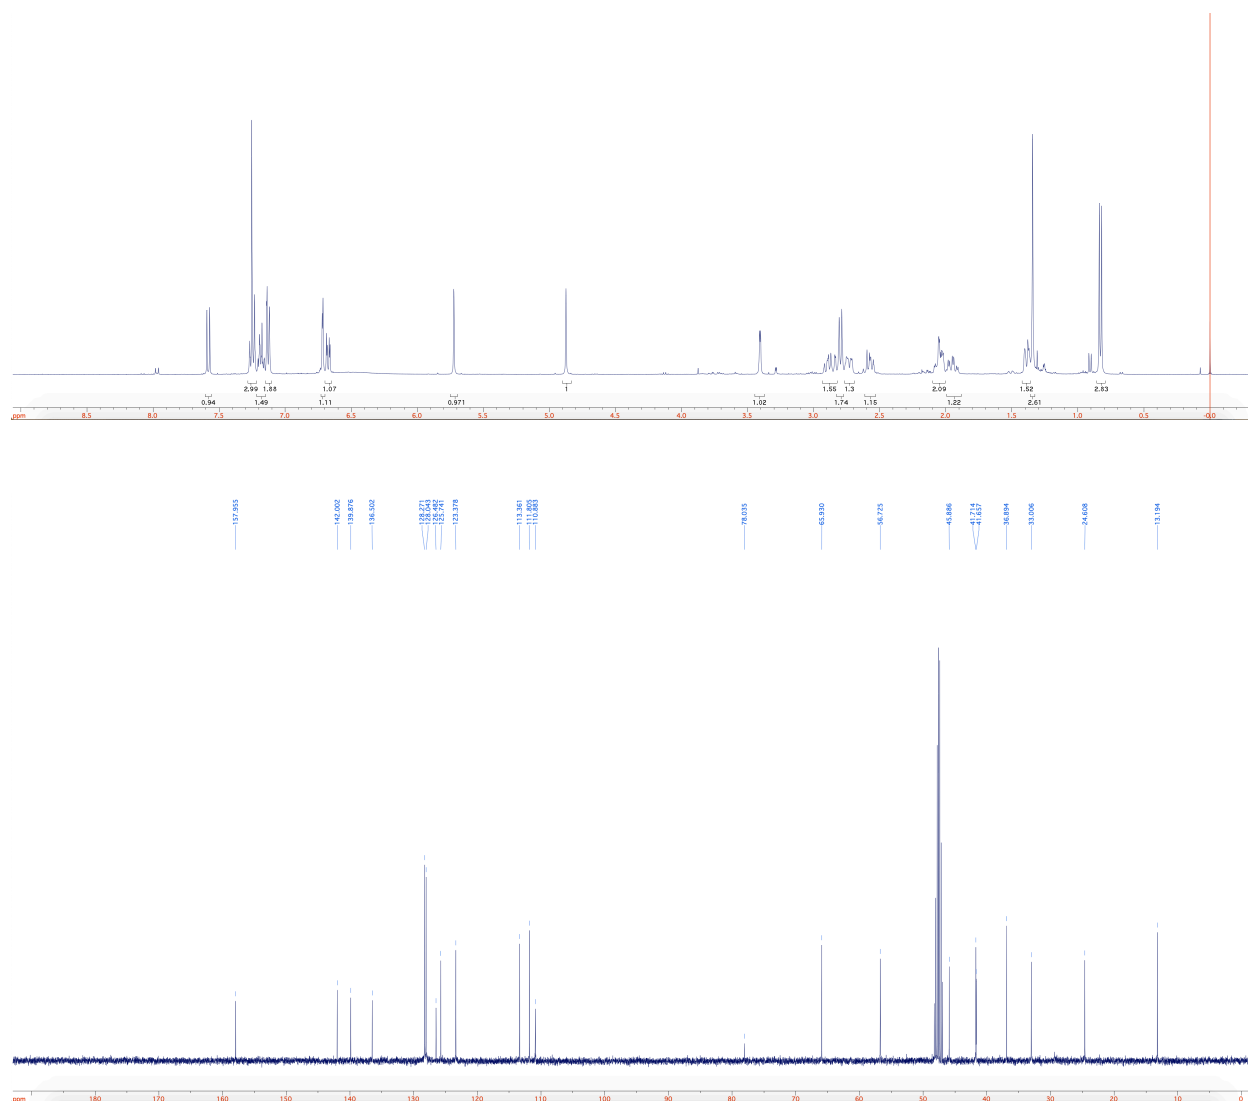

# <sup>1</sup>H NMR and <sup>13</sup>C NMR of (–)-39

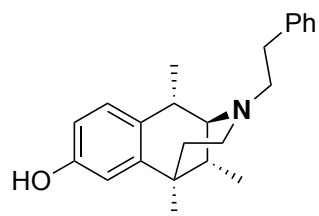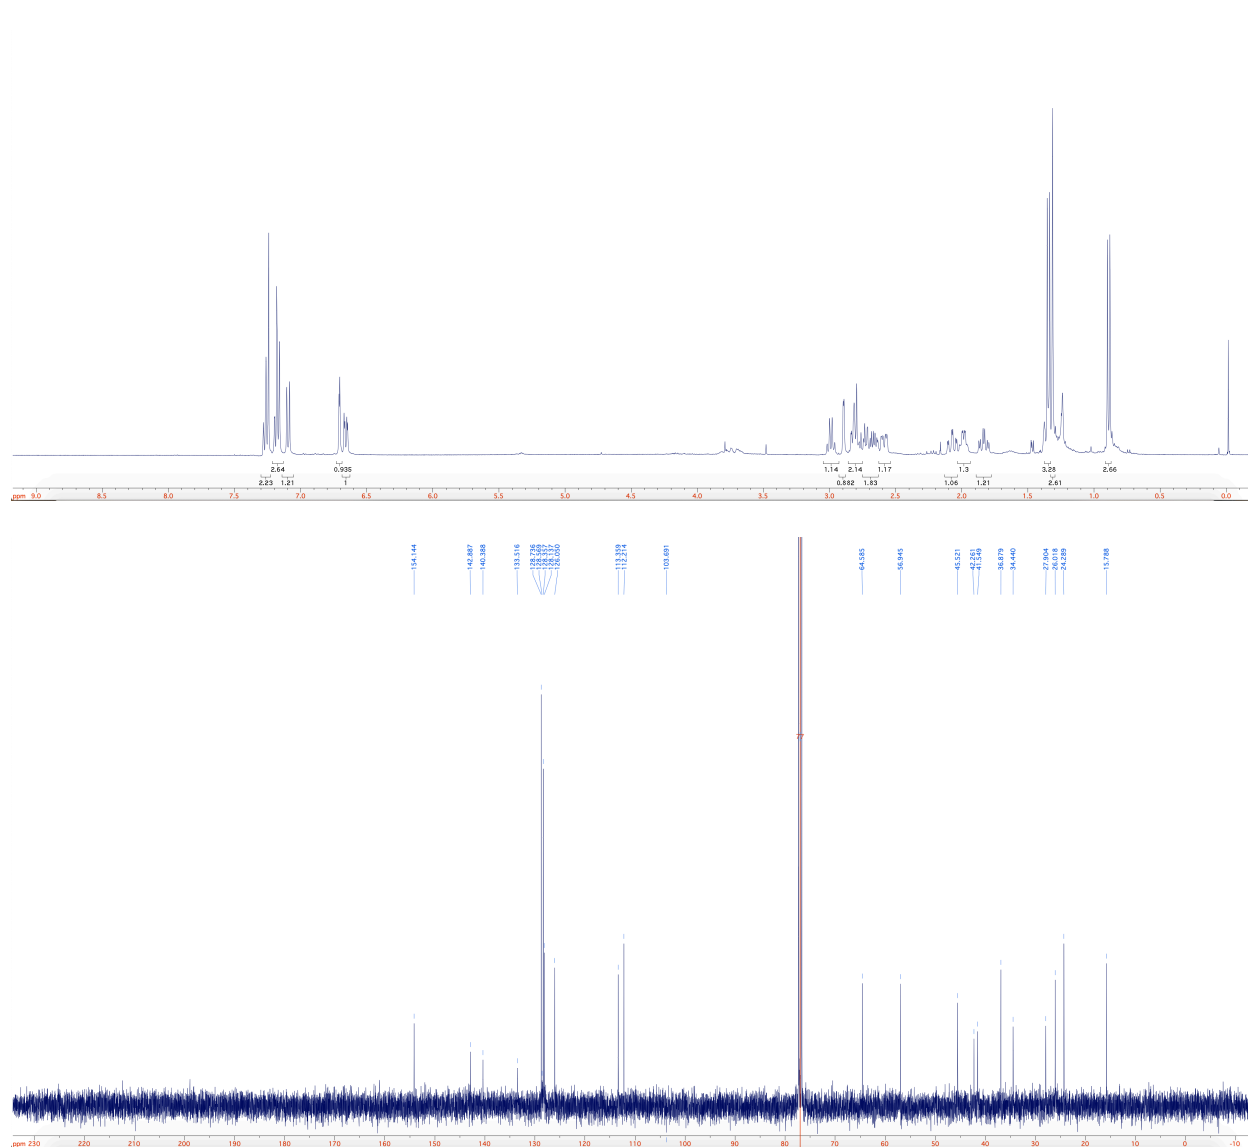

# <sup>1</sup>H NMR and <sup>13</sup>C NMR of (+)-39

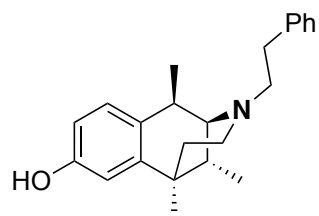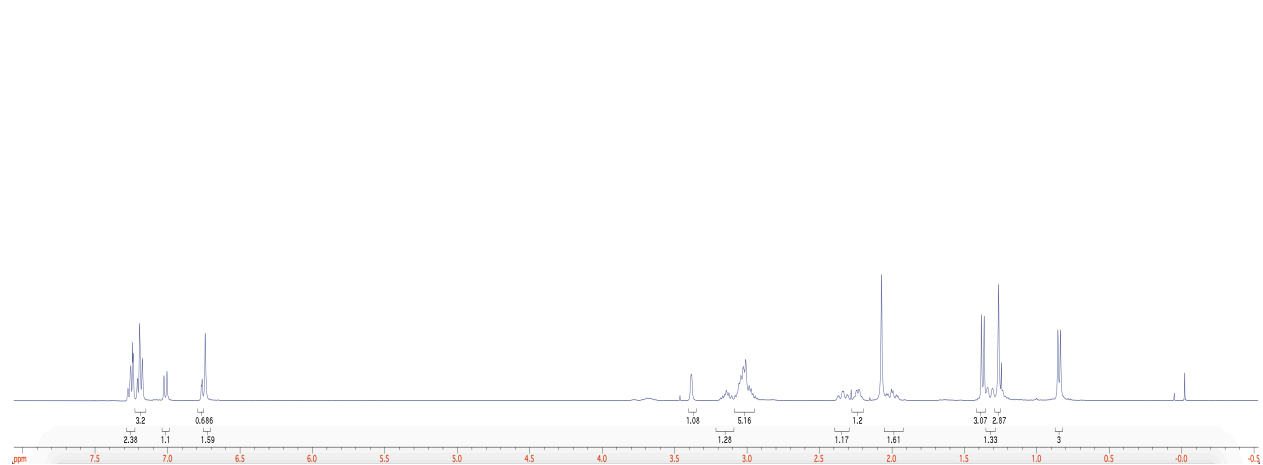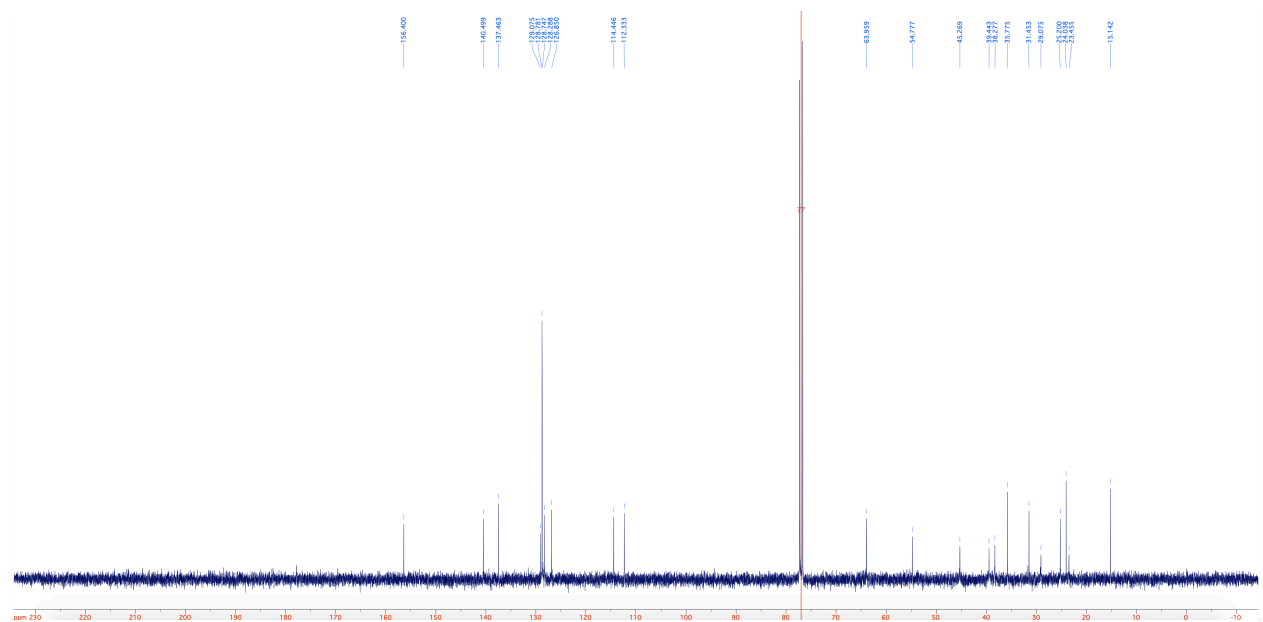

**Table S1.** Crystal data and structure refinement for (+)-**34**•HBr

|                                   |                                                         |                                                                               |
|-----------------------------------|---------------------------------------------------------|-------------------------------------------------------------------------------|
| Identification code               | knih131                                                 |                                                                               |
| Empirical formula                 | C <sub>24</sub> H <sub>32</sub> BrNO <sub>3</sub>       |                                                                               |
| Formula weight                    | 462.41                                                  |                                                                               |
| Temperature                       | 293(2) K                                                |                                                                               |
| Wavelength                        | 1.54178 Å                                               |                                                                               |
| Crystal system                    | Monoclinic                                              |                                                                               |
| Space group                       | P2 <sub>1</sub>                                         |                                                                               |
| Unit cell dimensions              | a = 11.2668(6) Å<br>b = 7.8053(4) Å<br>c = 13.0428(6) Å | $\alpha = 90^\circ$ .<br>$\beta = 97.890(2)^\circ$ .<br>$\gamma = 90^\circ$ . |
| Volume                            | 1136.13(10) Å <sup>3</sup>                              |                                                                               |
| Z                                 | 2                                                       |                                                                               |
| Density (20°C)                    | 1.352 Mg/m <sup>3</sup>                                 |                                                                               |
| Absorption coefficient            | 2.652 mm <sup>-1</sup>                                  |                                                                               |
| F(000)                            | 484                                                     |                                                                               |
| Crystal size                      | 0.097 x 0.074 x 0.060 mm <sup>3</sup>                   |                                                                               |
| Theta range for data collection   | 3.421 to 74.642°                                        |                                                                               |
| Index ranges                      | -13 ≤ h ≤ 14, -9 ≤ k ≤ 9, -16 ≤ l ≤ 16                  |                                                                               |
| Reflections collected             | 17096                                                   |                                                                               |
| Independent reflections           | 4606 [R <sub>int</sub> = 0.0970]                        |                                                                               |
| Completeness to theta = 67.679°   | 100.0 %                                                 |                                                                               |
| Absorption correction             | Semi-empirical from equivalents                         |                                                                               |
| Max. and min. transmission        | 0.7516 and 0.6310                                       |                                                                               |
| Refinement method                 | Full-matrix least-squares on F <sup>2</sup>             |                                                                               |
| Data / restraints / parameters    | 4606 / 4 / 272                                          |                                                                               |
| Goodness-of-fit on F <sup>2</sup> | 1.062                                                   |                                                                               |
| Final R indices [I > 2σ(I)]       | R <sub>1</sub> = 0.0573, wR <sub>2</sub> = 0.1474       |                                                                               |
| R indices (all data)              | R <sub>1</sub> = 0.0586, wR <sub>2</sub> = 0.1501       |                                                                               |
| Absolute structure parameter      | -0.02(2)                                                |                                                                               |
| Largest diff. peak and hole       | 1.083 and -0.458 e.Å <sup>-3</sup>                      |                                                                               |

**Table S2.** Atomic coordinates ( $\times 10^4$ ) and equivalent isotropic displacement parameters ( $\text{\AA}^2 \times 10^3$ ) for (+)-**34**•HBr.  $U(\text{eq})$  is defined as one third of the trace of the orthogonalized  $U^{ij}$  tensor.

|        | x        | y        | z       | $U(\text{eq})$ |
|--------|----------|----------|---------|----------------|
| C(1)   | 6834(3)  | 4479(4)  | 4542(3) | 50(1)          |
| N(2)   | 7036(3)  | 2914(4)  | 3901(3) | 50(1)          |
| C(3)   | 7565(3)  | 1456(5)  | 4570(3) | 50(1)          |
| C(4)   | 8685(3)  | 2034(5)  | 5261(3) | 54(1)          |
| C(5)   | 8512(3)  | 3661(5)  | 5894(3) | 50(1)          |
| C(6)   | 7610(3)  | 3295(5)  | 6645(3) | 51(1)          |
| C(7)   | 6382(3)  | 3508(5)  | 6321(3) | 52(1)          |
| O(8)   | 4856(2)  | 4285(7)  | 4968(3) | 75(1)          |
| C(8)   | 5918(3)  | 4082(6)  | 5278(3) | 54(1)          |
| C(9)   | 8033(3)  | 5072(5)  | 5123(3) | 51(1)          |
| C(10)  | 7868(4)  | 6833(5)  | 5607(4) | 65(1)          |
| C(11)  | 9745(3)  | 4174(9)  | 6466(4) | 68(1)          |
| C(12)  | 7997(4)  | 2716(6)  | 7637(4) | 61(1)          |
| O(13)  | 7498(6)  | 1897(7)  | 9322(4) | 95(1)          |
| C(13)  | 7173(5)  | 2418(6)  | 8327(4) | 70(1)          |
| C(13A) | 8747(9)  | 1691(15) | 9693(6) | 115(3)         |
| C(14)  | 5957(5)  | 2640(7)  | 8012(4) | 73(1)          |
| C(15)  | 5568(4)  | 3166(5)  | 7021(4) | 62(1)          |
| C(16)  | 5940(4)  | 2305(5)  | 3202(3) | 55(1)          |
| C(17)  | 5492(6)  | 3574(8)  | 2361(5) | 86(2)          |
| C(18)  | 4437(5)  | 2808(7)  | 1670(4) | 69(1)          |
| C(19)  | 3289(6)  | 3006(8)  | 1901(5) | 82(1)          |
| C(20)  | 2316(7)  | 2289(14) | 1303(9) | 116(4)         |
| C(21)  | 2521(12) | 1314(15) | 463(9)  | 124(4)         |
| C(22)  | 3625(13) | 1112(11) | 198(6)  | 125(4)         |
| C(23)  | 4591(8)  | 1851(10) | 809(5)  | 91(2)          |
| Br(24) | 8999(1)  | 4191(1)  | 2459(1) | 79(1)          |
| O(25)  | 7380(5)  | 7844(11) | 2635(6) | 117(2)         |
| C(26)  | 7585(7)  | 8882(14) | 1818(7) | 108(3)         |



**Table S3.** Bond lengths [Å] and angles [°] for (+)-**34**•HBr.

|                 |           |                  |           |
|-----------------|-----------|------------------|-----------|
| C(1)-N(2)       | 1.515(5)  | C(1)-C(9)        | 1.527(5)  |
| C(1)-C(8)       | 1.535(5)  | C(1)-H(1)        | 0.9800    |
| N(2)-C(3)       | 1.506(4)  | N(2)-C(16)       | 1.507(5)  |
| N(2)-H(2)       | 1.02(8)   | C(3)-C(4)        | 1.515(5)  |
| C(3)-H(3A)      | 0.9700    | C(3)-H(3B)       | 0.9700    |
| C(4)-C(5)       | 1.541(5)  | C(4)-H(4A)       | 0.9700    |
| C(4)-H(4B)      | 0.9700    | C(5)-C(6)        | 1.533(5)  |
| C(5)-C(11)      | 1.536(5)  | C(5)-C(9)        | 1.538(5)  |
| C(6)-C(12)      | 1.383(6)  | C(6)-C(7)        | 1.399(5)  |
| C(7)-C(15)      | 1.407(6)  | C(7)-C(8)        | 1.459(6)  |
| O(8)-C(8)       | 1.220(4)  | C(9)-C(10)       | 1.535(5)  |
| C(9)-H(9)       | 0.9800    | C(10)-H(10A)     | 0.9600    |
| C(10)-H(10B)    | 0.9600    | C(10)-H(10C)     | 0.9600    |
| C(11)-H(11A)    | 0.9600    | C(11)-H(11B)     | 0.9600    |
| C(11)-H(11C)    | 0.9600    | C(12)-C(13)      | 1.399(7)  |
| C(12)-H(12)     | 0.9300    | O(13)-C(13)      | 1.361(7)  |
| O(13)-C(13A)    | 1.433(12) | C(13)-C(14)      | 1.387(9)  |
| C(13A)-H(13A)   | 0.9600    | C(13A)-H(13B)    | 0.9600    |
| C(13A)-H(13C)   | 0.9600    | C(14)-C(15)      | 1.369(8)  |
| C(14)-H(14)     | 0.9300    | C(15)-H(15)      | 0.9300    |
| C(16)-C(17)     | 1.512(6)  | C(16)-H(16A)     | 0.9700    |
| C(16)-H(16B)    | 0.9700    | C(17)-C(18)      | 1.512(7)  |
| C(17)-H(17A)    | 0.9700    | C(17)-H(17B)     | 0.9700    |
| C(18)-C(19)     | 1.376(9)  | C(18)-C(23)      | 1.380(10) |
| C(19)-C(20)     | 1.375(11) | C(19)-H(19)      | 0.9300    |
| C(20)-C(21)     | 1.38(2)   | C(20)-H(20)      | 0.9300    |
| C(21)-C(22)     | 1.345(19) | C(21)-H(21)      | 0.9300    |
| C(22)-C(23)     | 1.384(14) | C(22)-H(22)      | 0.9300    |
| C(23)-H(23)     | 0.9300    | O(25)-C(26)      | 1.383(13) |
| O(25)-H(25)     | 0.82(3)   | C(26)-H(26A)     | 0.9600    |
| C(26)-H(26B)    | 0.9600    | C(26)-H(26C)     | 0.9600    |
|                 |           |                  |           |
| N(2)-C(1)-C(9)  | 109.2(3)  | N(2)-C(1)-C(8)   | 110.3(3)  |
| C(9)-C(1)-C(8)  | 112.1(3)  | N(2)-C(1)-H(1)   | 108.4     |
| C(9)-C(1)-H(1)  | 108.4     | C(8)-C(1)-H(1)   | 108.4     |
| C(3)-N(2)-C(16) | 109.8(3)  | C(3)-N(2)-C(1)   | 111.6(3)  |
| C(16)-N(2)-C(1) | 114.6(3)  | C(3)-N(2)-H(2)   | 109(4)    |
| C(16)-N(2)-H(2) | 110(4)    | C(1)-N(2)-H(2)   | 101(4)    |
| N(2)-C(3)-C(4)  | 110.5(3)  | N(2)-C(3)-H(3A)  | 109.5     |
| C(4)-C(3)-H(3A) | 109.5     | N(2)-C(3)-H(3B)  | 109.5     |
| C(4)-C(3)-H(3B) | 109.5     | H(3A)-C(3)-H(3B) | 108.1     |
| C(3)-C(4)-C(5)  | 114.1(3)  | C(3)-C(4)-H(4A)  | 108.7     |
| C(5)-C(4)-H(4A) | 108.7     | C(3)-C(4)-H(4B)  | 108.7     |
| C(5)-C(4)-H(4B) | 108.7     | H(4A)-C(4)-H(4B) | 107.6     |
| C(6)-C(5)-C(11) | 111.9(3)  | C(6)-C(5)-C(9)   | 110.3(3)  |
| C(11)-C(5)-C(9) | 110.1(3)  | C(6)-C(5)-C(4)   | 109.4(3)  |
| C(11)-C(5)-C(4) | 107.6(4)  | C(9)-C(5)-C(4)   | 107.4(3)  |
| C(12)-C(6)-C(7) | 119.5(4)  | C(12)-C(6)-C(5)  | 120.5(3)  |
| C(7)-C(6)-C(5)  | 120.0(4)  | C(6)-C(7)-C(15)  | 119.2(4)  |
| C(6)-C(7)-C(8)  | 122.0(3)  | C(15)-C(7)-C(8)  | 118.8(4)  |
| O(8)-C(8)-C(7)  | 124.0(4)  | O(8)-C(8)-C(1)   | 118.7(4)  |
| C(7)-C(8)-C(1)  | 117.4(3)  | C(1)-C(9)-C(10)  | 109.1(3)  |
| C(1)-C(9)-C(5)  | 108.3(3)  | C(10)-C(9)-C(5)  | 115.0(4)  |
| C(1)-C(9)-H(9)  | 108.0     | C(10)-C(9)-H(9)  | 108.0     |

|                      |           |                      |          |
|----------------------|-----------|----------------------|----------|
| C(5)-C(9)-H(9)       | 108.0     | C(9)-C(10)-H(10A)    | 109.5    |
| C(9)-C(10)-H(10B)    | 109.5     | H(10A)-C(10)-H(10B)  | 109.5    |
| C(9)-C(10)-H(10C)    | 109.5     | H(10A)-C(10)-H(10C)  | 109.5    |
| H(10B)-C(10)-H(10C)  | 109.5     | C(5)-C(11)-H(11A)    | 109.5    |
| C(5)-C(11)-H(11B)    | 109.5     | H(11A)-C(11)-H(11B)  | 109.5    |
| C(5)-C(11)-H(11C)    | 109.5     | H(11A)-C(11)-H(11C)  | 109.5    |
| H(11B)-C(11)-H(11C)  | 109.5     | C(6)-C(12)-C(13)     | 120.3(4) |
| C(6)-C(12)-H(12)     | 119.9     | C(13)-C(12)-H(12)    | 119.9    |
| C(13)-O(13)-C(13A)   | 118.6(6)  | O(13)-C(13)-C(14)    | 116.4(5) |
| O(13)-C(13)-C(12)    | 123.3(5)  | C(14)-C(13)-C(12)    | 120.3(5) |
| O(13)-C(13A)-H(13A)  | 109.5     | O(13)-C(13A)-H(13B)  | 109.5    |
| H(13A)-C(13A)-H(13B) | 109.5     | O(13)-C(13A)-H(13C)  | 109.5    |
| H(13A)-C(13A)-H(13C) | 109.5     | H(13B)-C(13A)-H(13C) | 109.5    |
| C(15)-C(14)-C(13)    | 119.5(4)  | C(15)-C(14)-H(14)    | 120.2    |
| C(13)-C(14)-H(14)    | 120.2     | C(14)-C(15)-C(7)     | 121.1(4) |
| C(14)-C(15)-H(15)    | 119.4     | C(7)-C(15)-H(15)     | 119.4    |
| N(2)-C(16)-C(17)     | 113.4(3)  | N(2)-C(16)-H(16A)    | 108.9    |
| C(17)-C(16)-H(16A)   | 108.9     | N(2)-C(16)-H(16B)    | 108.9    |
| C(17)-C(16)-H(16B)   | 108.9     | H(16A)-C(16)-H(16B)  | 107.7    |
| C(18)-C(17)-C(16)    | 109.3(4)  | C(18)-C(17)-H(17A)   | 109.8    |
| C(16)-C(17)-H(17A)   | 109.8     | C(18)-C(17)-H(17B)   | 109.8    |
| C(16)-C(17)-H(17B)   | 109.8     | H(17A)-C(17)-H(17B)  | 108.3    |
| C(19)-C(18)-C(23)    | 117.8(6)  | C(19)-C(18)-C(17)    | 120.7(6) |
| C(23)-C(18)-C(17)    | 121.5(6)  | C(20)-C(19)-C(18)    | 122.0(8) |
| C(20)-C(19)-H(19)    | 119.0     | C(18)-C(19)-H(19)    | 119.0    |
| C(19)-C(20)-C(21)    | 117.9(10) | C(19)-C(20)-H(20)    | 121.1    |
| C(21)-C(20)-H(20)    | 121.1     | C(22)-C(21)-C(20)    | 122.1(8) |
| C(22)-C(21)-H(21)    | 119.0     | C(20)-C(21)-H(21)    | 119.0    |
| C(21)-C(22)-C(23)    | 119.0(9)  | C(21)-C(22)-H(22)    | 120.5    |
| C(23)-C(22)-H(22)    | 120.5     | C(18)-C(23)-C(22)    | 121.2(9) |
| C(18)-C(23)-H(23)    | 119.4     | C(22)-C(23)-H(23)    | 119.4    |
| C(26)-O(25)-H(25)    | 117(5)    | O(25)-C(26)-H(26A)   | 109.5    |
| O(25)-C(26)-H(26B)   | 109.5     | H(26A)-C(26)-H(26B)  | 109.5    |
| O(25)-C(26)-H(26C)   | 109.5     | H(26A)-C(26)-H(26C)  | 109.5    |
| H(26B)-C(26)-H(26C)  | 109.5     |                      |          |

---

**Table S4.** Anisotropic displacement parameters ( $\text{\AA}^2 \times 10^3$ ) for (+)-**34**•HBr. The anisotropic displacement factor exponent takes the form:  $-2\pi^2 [h^2 a^{*2} U^{11} + \dots + 2 h k a^* b^* U^{12}]$

|        | U <sup>11</sup> | U <sup>22</sup> | U <sup>33</sup> | U <sup>23</sup> | U <sup>13</sup> | U <sup>12</sup> |
|--------|-----------------|-----------------|-----------------|-----------------|-----------------|-----------------|
| C(1)   | 50(1)           | 39(2)           | 61(2)           | 2(1)            | 10(1)           | 2(1)            |
| N(2)   | 49(1)           | 42(1)           | 58(2)           | 4(1)            | 11(1)           | 2(1)            |
| C(3)   | 53(2)           | 40(1)           | 60(2)           | 3(1)            | 13(1)           | 7(1)            |
| C(4)   | 45(2)           | 50(2)           | 70(2)           | 5(2)            | 14(2)           | 6(1)            |
| C(5)   | 41(1)           | 48(2)           | 61(2)           | 2(1)            | 9(1)            | -2(1)           |
| C(6)   | 51(2)           | 45(2)           | 58(2)           | -1(1)           | 14(1)           | -4(1)           |
| C(7)   | 51(2)           | 43(1)           | 65(2)           | -5(1)           | 19(2)           | -2(1)           |
| O(8)   | 46(1)           | 94(2)           | 85(2)           | -8(2)           | 9(1)            | 12(2)           |
| C(8)   | 43(1)           | 49(2)           | 71(2)           | -7(2)           | 12(1)           | 3(2)            |
| C(9)   | 50(2)           | 42(2)           | 65(2)           | 5(1)            | 14(1)           | -3(1)           |
| C(10)  | 71(2)           | 46(2)           | 79(3)           | -4(2)           | 10(2)           | -2(2)           |
| C(11)  | 48(2)           | 73(2)           | 82(2)           | 12(3)           | 2(2)            | -10(2)          |
| C(12)  | 64(2)           | 58(2)           | 62(2)           | 1(2)            | 9(2)            | -6(2)           |
| O(13)  | 131(4)          | 93(3)           | 65(2)           | 11(2)           | 27(2)           | -6(3)           |
| C(13)  | 99(3)           | 55(2)           | 60(2)           | 0(2)            | 24(2)           | -9(2)           |
| C(13A) | 142(7)          | 126(7)          | 70(3)           | 22(4)           | -6(4)           | -6(5)           |
| C(14)  | 89(3)           | 64(2)           | 73(3)           | -10(2)          | 41(2)           | -15(2)          |
| C(15)  | 58(2)           | 51(2)           | 83(3)           | -11(2)          | 29(2)           | -6(2)           |
| C(16)  | 59(2)           | 47(2)           | 58(2)           | 1(1)            | 6(2)            | -1(1)           |
| C(17)  | 95(3)           | 69(3)           | 87(3)           | 27(2)           | -19(3)          | -16(2)          |
| C(18)  | 81(3)           | 60(2)           | 64(2)           | 14(2)           | -1(2)           | -4(2)           |
| C(19)  | 90(3)           | 74(3)           | 80(3)           | 16(2)           | 13(2)           | -3(2)           |
| C(20)  | 80(3)           | 118(6)          | 141(8)          | 61(6)           | -11(4)          | -21(4)          |
| C(21)  | 150(8)          | 109(6)          | 98(6)           | 25(5)           | -40(6)          | -43(6)          |
| C(22)  | 220(12)         | 84(4)           | 61(3)           | 0(3)            | -15(5)          | -6(6)           |
| C(23)  | 118(4)          | 87(4)           | 68(3)           | 9(3)            | 8(3)            | 12(3)           |
| Br(24) | 83(1)           | 86(1)           | 74(1)           | 2(1)            | 30(1)           | -8(1)           |
| O(25)  | 80(3)           | 140(5)          | 136(5)          | -5(4)           | 38(3)           | 7(3)            |
| C(26)  | 99(4)           | 124(8)          | 97(4)           | -28(5)          | -3(3)           | 31(5)           |

**Table S5.** Hydrogen coordinates ( $\times 10^4$ ) and isotropic displacement parameters ( $\text{\AA}^2 \times 10^3$ ) for (+)-**34**•HBr.

|        | x         | y         | z        | U(eq) |
|--------|-----------|-----------|----------|-------|
| H(1)   | 6512      | 5397      | 4071     | 60    |
| H(2)   | 7660(60)  | 3360(100) | 3480(60) | 74    |
| H(3A)  | 7762      | 519       | 4134     | 60    |
| H(3B)  | 6981      | 1044      | 4993     | 60    |
| H(4A)  | 9311      | 2246      | 4835     | 65    |
| H(4B)  | 8955      | 1112      | 5735     | 65    |
| H(9)   | 8597      | 5202      | 4619     | 62    |
| H(10A) | 7303      | 6742      | 6092     | 98    |
| H(10B) | 7576      | 7634      | 5073     | 98    |
| H(10C) | 8624      | 7225      | 5959     | 98    |
| H(11A) | 9649      | 5083      | 6943     | 102   |
| H(11B) | 10248     | 4555      | 5974     | 102   |
| H(11C) | 10107     | 3203      | 6838     | 102   |
| H(12)  | 8809      | 2524      | 7845     | 74    |
| H(13A) | 9064      | 762       | 9331     | 172   |
| H(13B) | 8847      | 1444      | 10421    | 172   |
| H(13C) | 9166      | 2728      | 9575     | 172   |
| H(14)  | 5409      | 2433      | 8470     | 87    |
| H(15)  | 4751      | 3299      | 6808     | 74    |
| H(16A) | 5306      | 2082      | 3617     | 66    |
| H(16B) | 6127      | 1233      | 2883     | 66    |
| H(17A) | 5250      | 4626      | 2669     | 104   |
| H(17B) | 6127      | 3842      | 1955     | 104   |
| H(19)  | 3169      | 3645      | 2480     | 98    |
| H(20)  | 1543      | 2455      | 1460     | 139   |
| H(21)  | 1877      | 780       | 67       | 149   |
| H(22)  | 3737      | 485       | -388     | 150   |
| H(23)  | 5358      | 1699      | 636      | 110   |
| H(25)  | 7700(130) | 6900(90)  | 2680(90) | 175   |
| H(26A) | 7957      | 9928      | 2081     | 162   |
| H(26B) | 6837      | 9137      | 1399     | 162   |
| H(26C) | 8103      | 8300      | 1406     | 162   |

**Table S6.** Torsion angles [°] for (+)-**34**•HBr.

|                          |           |                          |           |
|--------------------------|-----------|--------------------------|-----------|
| C(9)-C(1)-N(2)-C(3)      | 60.5(4)   | C(8)-C(1)-N(2)-C(3)      | -63.0(3)  |
| C(9)-C(1)-N(2)-C(16)     | -174.0(3) | C(8)-C(1)-N(2)-C(16)     | 62.5(4)   |
| C(16)-N(2)-C(3)-C(4)     | 178.7(3)  | C(1)-N(2)-C(3)-C(4)      | -53.2(4)  |
| N(2)-C(3)-C(4)-C(5)      | 52.1(4)   | C(3)-C(4)-C(5)-C(6)      | 63.7(4)   |
| C(3)-C(4)-C(5)-C(11)     | -174.6(4) | C(3)-C(4)-C(5)-C(9)      | -56.0(4)  |
| C(11)-C(5)-C(6)-C(12)    | -28.0(5)  | C(9)-C(5)-C(6)-C(12)     | -151.0(4) |
| C(4)-C(5)-C(6)-C(12)     | 91.1(4)   | C(11)-C(5)-C(6)-C(7)     | 153.5(4)  |
| C(9)-C(5)-C(6)-C(7)      | 30.6(5)   | C(4)-C(5)-C(6)-C(7)      | -87.3(4)  |
| C(12)-C(6)-C(7)-C(15)    | 1.5(6)    | C(5)-C(6)-C(7)-C(15)     | 180.0(3)  |
| C(12)-C(6)-C(7)-C(8)     | -178.7(4) | C(5)-C(6)-C(7)-C(8)      | -0.3(6)   |
| C(6)-C(7)-C(8)-O(8)      | -179.9(5) | C(15)-C(7)-C(8)-O(8)     | -0.1(7)   |
| C(6)-C(7)-C(8)-C(1)      | -1.0(6)   | C(15)-C(7)-C(8)-C(1)     | 178.8(3)  |
| N(2)-C(1)-C(8)-O(8)      | -87.9(5)  | C(9)-C(1)-C(8)-O(8)      | 150.2(4)  |
| N(2)-C(1)-C(8)-C(7)      | 93.1(4)   | C(9)-C(1)-C(8)-C(7)      | -28.8(5)  |
| N(2)-C(1)-C(9)-C(10)     | 169.6(3)  | C(8)-C(1)-C(9)-C(10)     | -67.9(4)  |
| N(2)-C(1)-C(9)-C(5)      | -64.5(4)  | C(8)-C(1)-C(9)-C(5)      | 58.0(4)   |
| C(6)-C(5)-C(9)-C(1)      | -58.3(4)  | C(11)-C(5)-C(9)-C(1)     | 177.7(4)  |
| C(4)-C(5)-C(9)-C(1)      | 60.8(4)   | C(6)-C(5)-C(9)-C(10)     | 64.1(4)   |
| C(11)-C(5)-C(9)-C(10)    | -59.9(5)  | C(4)-C(5)-C(9)-C(10)     | -176.8(3) |
| C(7)-C(6)-C(12)-C(13)    | -2.9(6)   | C(5)-C(6)-C(12)-C(13)    | 178.6(4)  |
| C(13A)-O(13)-C(13)-C(14) | -178.5(7) | C(13A)-O(13)-C(13)-C(12) | 1.9(10)   |
| C(6)-C(12)-C(13)-O(13)   | -178.0(5) | C(6)-C(12)-C(13)-C(14)   | 2.4(7)    |
| O(13)-C(13)-C(14)-C(15)  | 179.9(5)  | (12)-C(13)-C(14)-C(15)   | -0.5(8)   |
| C(13)-C(14)-C(15)-C(7)   | -0.9(7)   | C(6)-C(7)-C(15)-C(14)    | 0.4(6)    |
| C(8)-C(7)-C(15)-C(14)    | -179.4(4) | C(3)-N(2)-C(16)-C(17)    | -168.6(5) |
| C(1)-N(2)-C(16)-C(17)    | 64.9(6)   | N(2)-C(16)-C(17)-C(18)   | 177.0(5)  |
| C(16)-C(17)-C(18)-C(19)  | 88.3(7)   | C(16)-C(17)-C(18)-C(23)  | -89.7(7)  |
| C(23)-C(18)-C(19)-C(20)  | -0.2(9)   | C(17)-C(18)-C(19)-C(20)  | -178.3(6) |
| C(18)-C(19)-C(20)-C(21)  | 1.5(10)   | C(19)-C(20)-C(21)-C(22)  | -2.7(13)  |
| C(20)-C(21)-C(22)-C(23)  | 2.5(14)   | C(19)-C(18)-C(23)-C(22)  | 0.0(9)    |
| C(17)-C(18)-C(23)-C(22)  | 178.1(6)  | C(21)-C(22)-C(23)-C(18)  | -1.1(12)  |

**Table S7.** Hydrogen bonds for (+)-**34**•HBr [ $\text{\AA}$  and  $^\circ$ ].

| D-H...A              | d(D-H)  | d(H...A) | d(D...A) | <(DHA) |
|----------------------|---------|----------|----------|--------|
| N(2)-H(2)...Br(24)   | 1.02(8) | 2.24(8)  | 3.251(3) | 176(6) |
| C(3)-H(3B)...O(8)#1  | 0.97    | 2.49     | 3.336(5) | 145.6  |
| C(9)-H(9)...Br(24)   | 0.98    | 3.02     | 3.843(4) | 142.4  |
| C(16)-H(16A)...O(8)  | 0.97    | 2.56     | 3.155(6) | 119.6  |
| O(25)-H(25)...Br(24) | 0.82(3) | 2.61(4)  | 3.410(7) | 166(7) |

Symmetry transformations used to generate equivalent atoms:

#1 -x+1,y-1/2,-z+1
